1

2

3 **Extremely flexible infection programs in a fungal plant pathogen**

4

5

6 Janine Haueisen<sup>1,2</sup>, Mareike Möller<sup>1,2</sup>, Christoph J. Eschenbrenner<sup>1,2</sup>, Jonathan Grandaubert<sup>1</sup>, Heike

7 Seybold<sup>1,2</sup>, Holger Adamiak<sup>2</sup> and Eva H. Stukenbrock<sup>1,2\*</sup>

8

9

10

11 <sup>1</sup>Environmental Genomics Group, Max Planck Institute for Evolutionary Biology, August-

12 Thienemann-Str. 2, 24306 Plön, Germany

13

14 <sup>2</sup>Environmental Genomics Group, Christian-Albrechts University Kiel, Am Botanischen Garten 1-

15 11, 24118 Kiel, Germany

16

17

18

19 \*Corresponding author:

20 Eva H. Stukenbrock

21 Environmental Genomics, CAU Kiel

22 Am Botanischen Garten 1-11, 24118 Kiel, Germany

23 Email: [estukenbrock@bot.uni-kiel.de](mailto:estukenbrock@bot.uni-kiel.de)

24 Phone: +49 (0) 431 880 6368

## 25 **Abstract**

26 Filamentous plant pathogens exhibit extraordinary levels of genomic variability that is proposed  
27 to facilitate rapid adaptation to changing host environments. However, the impact of genomic  
28 variation on phenotypic differentiation in pathogen populations is largely unknown. Here, we  
29 address the extent of variability in infection phenotypes of the hemibiotrophic wheat pathogen  
30 *Zymoseptoria tritici* by studying three field isolates collected in Denmark, Iran, and the  
31 Netherlands. These three isolates differ extensively in genome structure and gene content, but  
32 produce similar disease symptoms in the same susceptible wheat cultivar. Using advanced  
33 confocal microscopy, staining of reactive oxygen species, and comparative analyses of infection  
34 stage-specific RNA-seq data, we demonstrate considerable variation in the temporal and spatial  
35 course of infection of the three isolates. Based on microscopic observation, we determined four  
36 core infection stages: establishment, biotrophic growth, lifestyle transition, and necrotrophic  
37 growth and asexual reproduction. Comparative analyses of the fungal transcriptomes, sequenced  
38 for every infection stage, revealed that the gene expression profiles of the isolates differed  
39 significantly, and 20% of the genes are differentially expressed between the three isolates during  
40 infection. The genes exhibiting isolate-specific expression patterns are enriched in genes encoding  
41 effector candidates that are small, secreted, cysteine-rich proteins and putative virulence  
42 determinants. Moreover, the differentially expressed genes were located significantly closer to  
43 transposable elements, which are enriched for the heterochromatin-associated histone marks  
44 H3K9me3 and H3K27me3 on the accessory chromosomes. This observation indicates that  
45 transposable elements and epigenetic regulation contribute to the infection-associated  
46 transcriptional variation between the isolates. Our findings illustrate how high genetic diversity  
47 in a pathogen population can result in highly differentiated infection and expression phenotypes  
48 that can support rapid adaptation in changing environments. Furthermore, our study reveals an  
49 exceptionally high extent of plasticity in the infection program of an important wheat pathogen  
50 and shows a substantial redundancy in infection-related gene expression.

## 51 **Author summary**

52 *Zymoseptoria tritici* is a pathogen that infects wheat and induces necrosis in leaf tissue. *Z. tritici*  
53 field populations exhibit high levels of genetic diversity, and here we addressed the consequences  
54 of this diversity on infection phenotypes. We conducted a detailed comparison of the infection  
55 processes of three *Z. tritici* isolates collected in Denmark, the Netherlands, and Iran. We inoculated  
56 leaves of a susceptible wheat cultivar and monitored development of disease symptoms and  
57 infection structures in leaf tissue by confocal microscopy. The three isolates exhibited highly  
58 differentiated spatial and temporal patterns of infection, although quantitative disease was  
59 similar. Furthermore, more than 20% of the genes were differentially expressed in the three  
60 isolates during wheat infection. Variation in gene expression is particularly associated with  
61 transposable elements, suggesting a role of epigenetic regulation in transcriptional variation  
62 among the three isolates. Finally, we find that genes encoding putative virulence determinants  
63 were enriched among the differentially expressed genes, suggesting that each of the three *Z. tritici*  
64 isolates utilizes different strategies to manipulate host defenses. Our results emphasize that  
65 phenotypic diversity plays an important role in pathogen populations and should be considered  
66 when developing crop protection strategies.

## 67 **Introduction**

68 Population genomics and comparative genome analyses have been applied to characterize genetic  
69 variation within and between species of pathogens [1]. Studies of eukaryotic pathogens have  
70 demonstrated high levels of intraspecies genetic variability, even in species that predominantly  
71 propagate by clonal reproduction [2–5]. In sexual species, frequent recombination contributes to  
72 the formation of new genotypes, while transposable elements and repeat-rich genome  
73 compartments facilitate the generation of novel genetic variants, most notably in asexual species  
74 [6–8]. In addition, many fungal plant pathogens—both sexual and asexual species—carry  
75 exceptionally high levels of karyotypic variability that originates from structural chromosome  
76 rearrangements and the presence of accessory chromosomes or genome compartments  
77 composed of transposable elements [4,5,9–11].

78 Genetic variation can translate into phenotypic variation that is important for populations to  
79 persist in changing environments. High levels of phenotypic variation can provide an adaptive  
80 advantage to pathogens exposed to new host resistances or, in agricultural systems, drug  
81 treatments. However, while theoretical and empirical data support the importance of genetic  
82 variation in rapid adaptation, we still know little about the overall extent and consequences of  
83 phenotypic variation in populations of pathogens.

84 Phenotypic variation in pathogen populations has been studied mainly in the context of virulence  
85 and drug resistance. Disease phenotypes have been correlated with genetic maps or genome-wide  
86 single nucleotide polymorphism (SNP) data to identify variable sites responsible for distinct  
87 virulence phenotypes [12–15]. While virulence and drug resistance traits are main determinants  
88 of the overall fitness of a pathogen, other traits also influence infection development. For example,  
89 individual strains of pathogens may exhibit variation in the spatial, temporal, and physiological  
90 exploration of host tissues, as well in reproductive success. While these traits are not directly  
91 linked to virulence, they may greatly impact the fitness of individual isolates and evolution at the  
92 population scale [16].

93 In this study, we addressed the extent of variation in infection phenotypes of a fungal plant  
94 pathogen characterized by a high level of genomic variability. We used the wheat pathogen  
95 *Zymoseptoria tritici* (syn. *Mycosphaerella graminicola*) as a model to investigate how the  
96 development of disease symptoms and the transcriptional program induced during infection  
97 varies among three field isolates from geographically distinct locations. *Z. tritici* has a  
98 hemibiotrophic lifestyle characterized by an initial biotrophic phase, where the fungus feeds on  
99 living host cells, followed by necrotrophic growth where the fungus degrades and takes up  
100 nutrients from dead host cells. Genomics, transcriptomics, and proteomics studies have been  
101 applied to identify virulence determinants of *Z. tritici*. The haploid genome of *Z. tritici* comprises  
102 a high number of accessory chromosomes ranging from 400 kb to 1 Mb in size in the reference  
103 isolate IPO323 [17,18]. Recent studies provide evidence for the presence of virulence  
104 determinants on the accessory chromosomes, however the genes responsible for these effects  
105 have so far not been identified [19]. Furthermore, several genome-wide association (GWAS) and  
106 quantitative trait loci (QTL) mapping studies have linked a variety of phenotypic traits to genetic  
107 variants and candidate genes [20–24], including the avirulence gene *AvrStb6*, which interacts with  
108 the wheat resistance gene *Stb6* [25]. *Z. tritici* has served as a prominent model in population  
109 genetic studies of crop pathogens, and genetic variation has been assessed on a local (individual  
110 lesions) up to a continental scale. The amount of genetic variation in a *Z. tritici* field population is  
111 comparable to the variation found on a continental scale, including multiple regional populations  
112 [26–28]. Thus, the plants in a single wheat field are infected by *Z. tritici* isolates with wide  
113 genotypic diversity.

114 Here, we investigated how infection of a susceptible host by genetically and morphologically  
115 distinct isolates results in similar levels of quantitative virulence. By combining confocal  
116 microscopy, disease monitoring, reactive oxygen species (ROS) localization, and transcriptome  
117 analyses, we compiled a detailed characterization of infection phenotypes of the three isolates.  
118 We hypothesized that high genetic diversity not only increases the evolutionary potential of the  
119 pathogen but also results in a variety of host-pathogen interactions that cause a range of different

120 infection phenotypes. Our combined comparative analyses enabled us to characterize infection  
121 morphology and gene expression of the three *Z. tritici* isolates, including a core infection program  
122 and isolate-specific infection phenotypes. We conclude that variation in infection and expression  
123 phenotypes is important for adaptive evolution of pathogens and needs to be considered in the  
124 development of disease control strategies.

125

126

## 127 **Results and Discussion**

128

### 129 **The *Z. tritici* isolates Zt05, Zt09, and Zt10 are equally virulent, but disease** 130 **symptoms develop at different speeds**

131 We compared virulence phenotypes of three *Z. tritici* isolates Zt05 [29], Zt09 ( $\triangle$  IPO323 $\Delta$ Chr18, a  
132 derivate of the reference strain IPO323 [18] that lost chromosome 18 [30]), and Zt10 [31],  
133 previously collected in Denmark, the Netherlands, and Iran, respectively (S1 Table), on leaves of  
134 the highly susceptible winter wheat cultivar Obelisk. We evaluated infections 28 days post  
135 inoculation (dpi) by estimating the percentage of leaf area affected by necrosis (Fig 1A) and  
136 covered with pycnidia, the asexual fruiting bodies (Fig 1B). The production of pycnidia is an  
137 essential measure for pathogen fitness and virulence [32]. Although we observed different levels  
138 of necrosis (two-sided Mann-Whitney *U* tests,  $P \leq 0.0048$ ) we found no significant differences in  
139 the amount of pycnidia produced by the three isolates (two-sided Mann-Whitney *U* tests,  $P$   
140  $\geq 0.034$ ) (S1 Fig).

141 Because the three *Z. tritici* isolates are equally fit and virulent on the wheat cultivar Obelisk, we  
142 next investigated whether disease symptoms and pathogen infection develop at a similar pace.  
143 We monitored temporal disease progress by screening the leaves every other day for visible  
144 necrotic spots and pycnidia. Leaves inoculated with Zt05 and Zt09 showed necrosis and pycnidia  
145 significantly earlier than leaves inoculated with Zt10 (one-sided Mann-Whitney *U* tests,  $P \leq$   
146  $7.73 \cdot 10^{-8}$ ) (Fig 2A). The median onset of necrosis caused by Zt09 occurred one day after that

147 caused by Zt05 and is significantly later (one-sided Mann-Whitney  $U$  test,  $P = 0.0089$ ), although  
148 the first pycnidia of both isolates developed at the same time (two-sided Mann-Whitney  $U$  test,  $P$   
149 = 0.9455). Thus, although the three *Z. tritici* isolates produced the same pycnidia density in the  
150 cultivar Obelisk, disease develops at different paces.

151 ROS play a central role in plant pathogen defense by acting as signalling molecules after pathogen  
152 recognition and activating defense responses [33]. We visualized the accumulation of the ROS  
153  $H_2O_2$  in infected leaves by diaminobenzidine (DAB) staining to determine whether the observed  
154 differences in temporal disease development of *Z. tritici* isolates reflect a temporal variation in  
155 host response. Ten to 14 days after inoculation, we observed no ROS (Fig 2B) indicating that  
156 *Z. tritici* suppresses the activation of wheat immune responses during this phase. ROS  
157 accumulation coincided with the onset of necrosis (Fig 2B, S2 Fig) and, consistent with the faster  
158 disease progress, ROS accumulates earlier in leaves infected with Zt05 than Zt09 or Zt10. For Zt09  
159 and Zt10, high ROS concentrations appear at only 18 dpi when Zt05 infected leaves are already  
160 largely necrotic and the DAB staining indicates further increased ROS concentrations (Fig 2B, S2  
161 Fig). Thereby, the timing of ROS accumulation in response to the three *Z. tritici* isolates is  
162 consistent with the observed differences in the temporal development of disease symptoms in  
163 infected wheat tissue.

164

### 165 ***Z. tritici* isolates tolerate different levels of abiotic stress**

166 *Z. tritici* is characterized by a dimorphic lifestyle with hyphal growth during host infection and  
167 predominantly yeast-like growth in culture [34]. The yeast/hyphae dimorphism is likely inherited  
168 as a multigenic quantitative trait [35] and is essential for pathogenicity [36]. The fungus is exposed  
169 to a multitude of environmental influences during infection, dispersal, and other less well  
170 characterized stages of the life cycle such as saprotrophic growth and spore dormancy. We  
171 compared tolerance of the three *Z. tritici* isolates to several abiotic *in vitro* stressors (temperature,  
172 oxidative, osmotic, and cell wall stresses) to assess the variability in growth phenotypes. Colonies  
173 of the three isolates exhibited different morphologies and tolerated different levels of abiotic

174 stress (Table 1, S3 Fig). Only osmotic stress led to the same level of reduced growth in all strains.  
175 Under all tested conditions, colonies of Zt09 and Zt10 were mainly composed of yeast-like cells,  
176 whereas Zt05 predominantly grew as hyphae. On plates with Congo red or calcoflour white, Zt05  
177 formed hyphal colonies, similar to those formed on yeast-malt-sucrose (YMS) control plates,  
178 whereas Zt09 and Zt10 were growth-impaired. These results indicate differences in the cell wall  
179 composition of yeast-like and hyphal cells, and that yeast-like cells are more susceptible to cell  
180 wall-interfering agents.

181 Elevated temperatures greatly impact development of Zt10 that formed strongly melanized  
182 colonies at 20/22°C and 28°C. Melanin pigments have several important functions in fungal  
183 pathogens, including protection against harsh environmental conditions [37]. Zt10 was collected  
184 in the Ilam Province, one of the hottest and driest regions in Iran [38], and the increased  
185 melanization could reflect local adaptation to extreme temperatures and temperature  
186 fluctuations [39], desiccation, and increased UV radiation.

187 Oxidative stress eventually diminishes growth of all isolates, although Zt09 tolerated exposure to  
188 H<sub>2</sub>O<sub>2</sub> more than Zt05 and Zt10. *Z. tritici* experiences oxidative stress *in planta* from ROS produced  
189 as a host defense response or released from dead tissue. In general, higher tolerance to ROS is  
190 advantageous [40], for example during necrotrophic growth and pycnidia formation in dead  
191 mesophyll tissue [41]. However, mechanisms to detoxify extracellular ROS must be tightly  
192 regulated to avoid ROS levels that are toxic to the hosts [33], and we speculate that the observed  
193 differences in H<sub>2</sub>O<sub>2</sub> tolerance reflect divergent adaptation of the *Z. tritici* isolates to host  
194 populations with different defense responses to pathogen invasion. Together, the *in vitro* stress  
195 assay revealed unanticipated intraspecies variation in tolerance to abiotic stresses among the *Z.*  
196 *tritici* isolates, especially considering that all were isolated in agro-ecosystems from the same host  
197 species, *Triticum aestivum*. The variation in colony morphology and stress responses may reflect  
198 different adaptations of the *Z. tritici* isolates to their local environments, and our observations  
199 suggest that ecological adaptation of fungal plant pathogens can be a strong driver of phenotypic  
200 divergence.



201 **Table 1. The three *Z. tritici* isolates vary in tolerance to abiotic stressors.**

|      | 20/22C° at<br>16-h day /<br>8-h night | 28C° | 2 mM H <sub>2</sub> O <sub>2</sub> | 3 mM H <sub>2</sub> O <sub>2</sub> | 1 M<br>sorbitol | 1 M NaCl | 500 µg/mL<br>Congo red | 200 µg/mL<br>calcofluor<br>white |
|------|---------------------------------------|------|------------------------------------|------------------------------------|-----------------|----------|------------------------|----------------------------------|
| Zt05 | -                                     | +    | ++                                 | +++                                | +               | ++       | -                      | -                                |
| Zt09 | -                                     | -    | -                                  | +                                  | +               | ++       | ++                     | ++                               |
| Zt10 | ++                                    | +++  | +                                  | ++                                 | +               | ++       | ++                     | +                                |

202 Summary of the *in vitro* stress assay comparing tolerance of the *Z. tritici* isolates Zt05, Zt09, and  
203 Zt10 to abiotic stressors. Symbols indicate tolerance levels in comparison to growth on YMS  
204 control plates at 18°C: - isolate was not affected, + isolate was mildly sensitive, ++ isolate was  
205 moderately sensitive, +++ isolate was highly sensitive.

206

### 207 ***Z. tritici* infection is characterized by four core developmental stages**

208 Next, we aimed to morphologically characterize host colonization of the three *Z. tritici* isolates.  
209 We conducted detailed confocal microscopy analyses in which we scanned 101 leaves harvested  
210 at 16 time points after inoculation. Analyses of large z-stacks of longitudinal optical sections  
211 allowed us to infer the spatial and temporal fungal colonization on and in infected leaves. First,  
212 we focused on the commonalities in host colonization between the different isolates and identified  
213 a sequence of four stages that we define as the core infection program of *Z. tritici* (Fig 3).

214 Stage A, or infection establishment, involves the penetration of wheat leaf tissue by fungal hyphae.  
215 Fungal cells germinate after inoculation on the leaf surface, indicating that germination is  
216 triggered extrinsically after the fungus senses particular plant-derived cues, as has been  
217 previously shown for *Fusarium oxysporum* [42]. Germ tubes develop into infection hyphae, some  
218 of which grow in the direction of stomata (Fig 3A stage A, S1 and S2 Animation). During stomatal  
219 penetration and in the sub-stomatal cavities, infection hyphae grow in tight contact with the guard  
220 cells. We occasionally noticed slight swelling of hyphae on top of stomatal openings resembling  
221 primitive appressoria [43,44]. However, we never observed penetration of epidermal cells.

222 Stage B refers to the symptomless, biotrophic intercellular colonization of the wheat mesophyll  
223 (Fig 3A stage B, S3 and S4 Animation). During this stage, the pathogen explores host tissue while

224 avoiding recognition by the host immune system, which otherwise would have resulted in a  
225 resistance response in the infected leaf tissue (Fig 2B). Interestingly, hyphae first grow in the  
226 interspace of epidermis and mesophyll, where they spread via the grooves between adjacent  
227 epidermal cells before deeper mesophyll cell layers are colonized.

228 Infection stage C comprises the transition from biotrophic to necrotrophic growth when the first  
229 disease symptoms develop (Fig 3A, stage C). For asexual reproduction, *Z. tritici* requires large  
230 amounts of nutrients that are released from dead host cells. Fungal hyphae branch extensively  
231 and colonize all mesophyll layers, with hyphae growing around individual plant cells as they die.  
232 Primal structures of pycnidia start to develop (S5-S7 Animation), and ring-like scaffolds form in  
233 sub-stomatal cavities where hyphae align and build stromata that give rise to conidiogenous cells.  
234 Finally, infection stage D is characterized by necrotrophic colonization and asexual reproduction  
235 (Fig 3A, stage D). Hyphae colonize an environment that is nutrient-rich but also hostile due to the  
236 high abundance of ROS, as demonstrated by DAB staining (Fig 2B). Within necrotic lesions,  
237 mesophyll tissue is heavily colonized, plant cells are dead, and mature pycnidia are visible (S8 and  
238 S9 Animation). Hyphae wrap around collapsed host cells, possibly to improve the acquisition of  
239 nutrients and protect resources from competing saprotrophs. Sub-stomatal cavities are occupied  
240 by sub-globose pycnidia which harbour hyaline, oblong asexual pycnidiospores that extrude  
241 through stomatal openings.

242 While the four infection stages of *Z. tritici* can be clearly distinguished, infections by different cells  
243 of one isolate are not completely synchronized; different infection stages can be present  
244 simultaneously on the same inoculated leaf.

245 During biotrophic colonization of wheat tissue, fluorescence emitted from fluorescein  
246 isothiocyanate conjugated to wheat germ agglutinin (WGA-FITC) primarily came from septae and  
247 was weak compared to that during necrotrophic colonization, during which fluorescence was also  
248 emitted from interseptal regions. Previously, similar observations were reported in endophytic  
249 and epiphyllous [45] and biotrophic and necrotrophic hyphae [46]. WGA binds to N-  
250 acetylglucosamine residues that build chitin, an elicitor of plant immunity [47]. Fungal plant

251 pathogens can prevent recognition, e.g. through chitin-binding LysM effectors [48–50] like the  
252 extracellular LysM protein ChELP2, that was also shown to limit accessibility of chitin to WGA in  
253 biotrophic hyphae of *C. higginsianum* [46]. In *Z. tritici*, two LysM effectors protect hyphae from  
254 plant chitinases [51], and Mg3LysM shields chitin from recognition by wheat receptors [52].  
255 Hence, it is possible that Mg3LysM also limits binding of WGA to chitin during biotrophic, but not  
256 necrotrophic, colonization of *Z. tritici* leading to the differences in fluorescence signals from  
257 biotrophic and necrotrophic hyphae.

258

### 259 **Highly distinct development of host infection by the three *Z. tritici* isolates**

260 While we clearly recognized the four core infection stages for the isolates Zt05, Zt09, and Zt10, we  
261 also observed differences. In stage A, a main difference was the time between inoculation and first  
262 stomatal penetration. Infection hyphae of Zt05 enter stomata at 1 to 5 dpi, whereas germ tube  
263 formation and stomatal penetration for Zt09 and Zt10 occur later (Fig 3A, stage A). For Zt05, we  
264 observed strong epiphyllous proliferation and, in contrast to the two other isolates, frequently the  
265 occurrence of several hyphae entering a single stoma (Fig 3A, stage A: Zt05). Stomatal  
266 penetrations were evenly distributed for Zt05 and Zt09 within inoculated leaf areas, while Zt10  
267 penetrations were more clustered, leading to patchy infections (Fig 3A, stage C and D: Zt10).

268 The most striking difference between the isolates was the extent of biotrophic colonization during  
269 stage B (Fig 3B). Zt05 develops expanded biotrophic hyphal networks with long “runner” hyphae  
270 growing longitudinally between epidermis and mesophyll (Fig 3A, stage B: Zt05, Fig 3B.1, S3  
271 Animation). Zt09 produces fewer hyphae that are located mainly between epidermis and  
272 mesophyll and in the first mesophyll cell layer (Fig 3A, stage B: Zt09, Fig 3B.2). Biotrophic growth  
273 of Zt10 is limited to the mesophyll cells adjacent to sub-stomatal cavities (Fig 3A, stage B: Zt10,  
274 Fig 3B.3). Because biotrophic colonization depends on successful evasion of host immunity [53],  
275 the different extent of colonization could reflect different strategies to bypass recognition in a  
276 given host genotype.

277 During stages C and D, the differences in infection development primarily relate to temporal  
278 variances. First, Zt05 switches to necrotrophic growth (9 to 14 dpi), followed by Zt09 (13 to 16  
279 dpi) and Zt10 (13 and 17 dpi) (Fig 3A, stage C). The isolates enter stage D in the same order.  
280 Furthermore, Zt10 forms two pycnidia in one sub-stomatal cavity (Fig 3A, stages C and D: Zt10,  
281 S7 Animation) more often than Zt05 and Zt09. Taken together, the infection development of the  
282 studied *Z. tritici* isolates is highly divergent, although the final production of asexual pycnidia does  
283 not differ significantly (Fig 1), suggesting that the isolate-specific characteristics in host-pathogen  
284 interactions add up to equally successful strategies for colonization and reproduction in a  
285 susceptible wheat cultivar. We conclude that infection development of *Z. tritici* can be highly  
286 flexible with respect to the timing of the lifestyle transition and the spatial distribution of infecting  
287 hyphae inside host tissue.

288

### 289 **Genomes of the three *Z. tritici* isolates exhibit high variation and different** 290 **chromosome composition**

291 Next, we investigated the genomes of the three isolates. High levels of genomic variability have  
292 previously been described within and between species in the genus *Zymoseptoria* to which, in  
293 particular, the content and composition of the accessory chromosomes contribute [18,28,54–56].  
294 A previously conducted whole genome comparison using the isolate IPO323 (39.7 Mb) [18] as  
295 reference, identified 500,177 single nucleotide polymorphisms (SNPs) in Zt05 and 617,431 SNPs  
296 in Zt10, indicating a considerable genetic distance between the three isolates [57]. In order to  
297 further quantify genomic variation between the three isolates in our study, we performed  
298 electrophoretic karyotyping and whole genome long read-sequencing (S1 Text).

299 We visualized and compared small chromosomes in the range of 225 to 1,125 kb that are known  
300 to exhibit size variation and presence-absence polymorphisms by pulsed-field gel electrophoresis  
301 (PFGE). We observed very different karyotypes with no small chromosomes of the same size (S4  
302 Fig). Further, the PFGE results suggest that Zt05 and Zt10 possess at least seven and four putative  
303 accessory chromosomes, respectively and show length polymorphisms of the smallest core

304 chromosomes 12 (~1.463 kb) and 13 (~1,186 kb) compared to Zt09, consistent with a previous  
305 study [58]. However, the loss of chromosome 18 (~574 kb) in Zt09 in comparison to IPO323 could  
306 not be visualized by PFGE as the applied conditions allow no separation from chromosomes 17  
307 (~584 kb) and 16 (~607 kb).

308 To further assess variation in genomic content and structure, we compared the synteny of Zt05  
309 and Zt10 contigs to the chromosomes of the *Z. tritici* reference IPO323 [18]. To this end, we  
310 assembled long-read SMRT Sequencing data for Zt05 and Zt10 and obtained high-quality *de novo*  
311 genome assemblies with contig N50 values of 2.45 Mb and 2.93 Mb and assembly sizes of 41.95 Mb  
312 and 39.33 Mb, respectively (S2 Table). In total, we obtained 62 unique contigs (unitigs) for Zt05  
313 and 22 for Zt10. We identified telomeric repeats at both ends of 15 unitigs in Zt05 and 17 unitigs  
314 in Zt10 and consider these to be completely assembled chromosomes (S2 Table). By whole-  
315 chromosome synteny analyses using SyMAP, we identified large syntenic DNA blocks for all 21  
316 chromosomes of IPO323 in the Zt05 assembly, while Zt10 lacked homologs of chromosomes 18,  
317 20 and 21 (S5 and S6 Figs, S2 Table). Although karyotypes and chromosome structure are very  
318 different in Zt05 and Zt10 in comparison to the reference IPO323 and hence the derived Zt09  
319 ( $\triangleq$ IPO323 $\Delta$ Chr18), we find homologous regions from all chromosomes and only ~ 2.58 Mb (Zt05)  
320 and ~ 2.75 Mb (Zt10) of unique DNA.

321 To identify the genes that are shared between the three *Z. tritici* isolates, we performed nucleotide  
322 BLAST analyses using the coding sequences of the 11,839 annotated genes of the reference  
323 IPO323 as input [59]. We identified 11,138 IPO323 genes (94.08%) in Zt05 and 10,745 (90.76%)  
324 in Zt10 (e-value cut-off  $1e^{-3}$ , identity  $\geq 90\%$ , query coverage between 90% and 110%). The gene  
325 presence/absence patterns correlate with the absence of large syntenic DNA blocks of  
326 chromosomes 18, 20, and 21 in Zt10 (S6 Fig, S2 Table). 91% of genes on core chromosomes are  
327 shared, while only 49% (313 of 643) of the genes located on accessory chromosomes are present  
328 in Zt05, Zt09, and Zt10 (S2 Table). Similarly, only 85% (370 of 434) of the previously identified  
329 genes encoding candidate secreted effector proteins (CSEPs) [6] were found in all isolates,  
330 pointing to high levels of plasticity in the effector repertoire of the three isolates Zt05, Zt09, and

331 Zt10. In total, 10,426 genes were present in Zt05, Zt09, and Zt10 and were considered to be  
332 *Z. tritici* core genes for further analyses (S3 Table). In summary, the genome comparison of Zt05,  
333 Zt09, and Zt10 shows a high extent of variation at single nucleotide positions as well as structural  
334 variation including differences in the total gene content.

335

### 336 **Generation of isolate- and stage-specific transcriptomes based on confocal** 337 **microscopy analyses**

338 Given the morphological and temporal differences in infection development, we next asked how  
339 gene expression profiles differ between the *Z. tritici* isolates Zt05, Zt09, and Zt10 during wheat  
340 infection. Previous studies have demonstrated transcriptional re-programming in *Z. tritici* during  
341 infection [30,60–64] and shown different transcriptional programs of strains that differ in extent  
342 of virulence [65]. Those studies focused primarily on the reference isolate IPO323, and the  
343 sequenced material was sampled at defined time points of infection that were not coordinated to  
344 distinct infection stages as described above.

345 We collected leaf material at up to nine time points per isolate and conducted confocal microscopy  
346 analyses to select samples for RNA extraction and transcriptome sequencing based on the  
347 morphological infection stage (S7 Fig, S4 Table). We generated stage-specific RNA-seq datasets  
348 corresponding to the four core infection stages, allowing us to compare the isolate-specific  
349 expression profiles at the same developmental stage of infection. Our final dataset comprises four  
350 stage-specific transcriptomes per isolate with two biological replicates per sample (Table 2).

351 We obtained 89.2 to 147.5 million single-end, strand-specific reads per replicate (in total >2.7  
352 billion reads) that were quality trimmed and filtered. Between 4.54% (early infection) and 76.4%  
353 (late infection) of the reads could be mapped to the genome of the respective isolate, reflecting  
354 the infection stage-specific amount of fungal biomass (Table 2, S5 Table, S1 Text). Across all  
355 isolates, transcriptomes of stages A and B, representing biotrophic growth, cluster together and  
356 are clearly different from transcriptomes of stages C and D that likewise cluster and represent  
357 necrotrophic growth of *Z. tritici* (S8 and S9 Figs). Exploring the transcriptome datasets based on

358 gene read counts shows the greatest variation of biological replicates for Zt10 at stage C (S10 Fig),  
 359 possibly reflecting variability in the infection development of the two biological replicates.  
 360

361 **Table 2. Summary of the stage-specific transcriptomes (A-D) of the three *Z. tritici* isolates**

| Isolate           | Infection stage | Sample       | Time point (dpi) | No. of filtered reads | No. of reads mapped to genome | % reads mapped to genome | No. of genes FPKM $\geq 2^*$ | No. of genes FPKM $\geq 10^*$ |
|-------------------|-----------------|--------------|------------------|-----------------------|-------------------------------|--------------------------|------------------------------|-------------------------------|
| Zt05 <sup>1</sup> | A               | Zt05_Ta_A_01 | 3                | 107,507,137           | 15,213,307                    | 14.15                    | 9,302                        | 7,455                         |
|                   |                 | Zt05_Ta_A_02 |                  | 81,479,903            | 10,509,515                    | 12.90                    |                              |                               |
|                   | B               | Zt05_Ta_B_01 | 8                | 113,732,295           | 15,057,425                    | 13.24                    | 9,404                        | 7,623                         |
|                   |                 | Zt05_Ta_B_02 |                  | 128,271,704           | 14,856,314                    | 11.58                    |                              |                               |
|                   | C               | Zt05_Ta_C_01 | 13               | 91,298,814            | 26,756,807                    | 29.31                    | 9,538                        | 7,982                         |
|                   |                 | Zt05_Ta_C_02 |                  | 135,198,719           | 34,329,884                    | 25.39                    |                              |                               |
| D                 | Zt05_Ta_D_01    | 20           | 86,100,462       | 41,871,582            | 48.63                         | 9,585                    | 7,914                        |                               |
|                   | Zt05_Ta_D_02    |              | 119,101,106      | 76,123,086            | 63.91                         |                          |                              |                               |
| Zt09 <sup>2</sup> | A               | Zt09_Ta_A_01 | 4                | 129,342,007           | 5,868,572                     | 4.54                     | 9,435                        | 7,482                         |
|                   |                 | Zt09_Ta_A_02 |                  | 92,711,865            | 5,582,561                     | 6.02                     |                              |                               |
|                   | B               | Zt09_Ta_B_01 | 11               | 96,767,482            | 5,034,677                     | 5.20                     | 9,718                        | 7,910                         |
|                   |                 | Zt09_Ta_B_02 |                  | 103,428,015           | 5,964,566                     | 5.77                     |                              |                               |
|                   | C               | Zt09_Ta_C_01 | 13               | 121,529,652           | 31,264,373                    | 25.73                    | 9,892                        | 8,220                         |
|                   |                 | Zt09_Ta_C_02 |                  | 93,253,633            | 27,790,773                    | 29.80                    |                              |                               |
| D                 | Zt09_Ta_D_01    | 20           | 110,296,264      | 84,263,562            | 76.40                         | 9,867                    | 7,949                        |                               |
|                   | Zt09_Ta_D_02    |              | 101,757,635      | 75,044,880            | 73.75                         |                          |                              |                               |
| Zt10 <sup>3</sup> | A               | Zt10_Ta_A_01 | 6                | 93,557,587            | 4,895,650                     | 5.23                     | 8,814                        | 7,219                         |
|                   |                 | Zt10_Ta_A_02 |                  | 91,111,840            | 4,836,535                     | 5.31                     |                              |                               |
|                   | B               | Zt10_Ta_B_01 | 11               | 94,828,793            | 5,951,869                     | 6.28                     | 9,068                        | 7,407                         |
|                   |                 | Zt10_Ta_B_02 |                  | 110,255,245           | 7,896,227                     | 7.16                     |                              |                               |
|                   | C               | Zt10_Ta_C_01 | 13               | 86,652,710            | 20,804,110                    | 24.01                    | 9,241                        | 7,742                         |
|                   |                 | Zt10_Ta_C_02 |                  | 91,070,127            | 8,620,099                     | 9.47                     |                              |                               |
| D                 | Zt10_Ta_D_01    | 24           | 98,493,807       | 29,939,216            | 30.40                         | 9,062                    | 7,308                        |                               |
|                   | Zt10_Ta_D_02    |              | 93,690,628       | 34,607,371            | 36.94                         |                          |                              |                               |

362 Overview of RNA-seq datasets including time point of sampling, number of sequenced reads post  
 363 filtering, number of mapped reads, percentage of mapped reads, and numbers of transcribed  
 364 genes. \* FPKM values were calculated using Cuffdiff2 and are normalized over all infection stages  
 365 within the respective isolate (normalization method: geometric, dispersion method: per-  
 366 condition). <sup>1</sup> 11,138 genes of IPO323 (94.08%) found by nucleotide blast for Zt05. <sup>2</sup> 11,754 of the  
 367 11,839 genes predicted and annotated for IPO323 [59]; 85 genes located on chromosome 18 were  
 368 not considered. <sup>3</sup> 10,745 genes of IPO323 (90.76%) found by nucleotide blast for Zt10.

## 369 **Core *Zymoseptoria tritici* transcriptional program during wheat infection**

370 The mean expression of genes located on accessory chromosomes was between 6-fold and 20-  
371 fold lower than the expression levels of genes located on core chromosomes (S6 Table). We  
372 performed differential gene expression analyses to compare expression of the 10,426 *Z. tritici* core  
373 genes. We identified 597 genes that were differentially expressed between the infection stages  
374 (DESeq2,  $P_{\text{adj}} \leq 0.01$ ,  $|\log_2 \text{fold change}| \geq 2$ ) and show the same expression kinetics in all three  
375 isolates (Fig 4A). Interestingly, 79 of these genes were differentially expressed between several  
376 infection stages, suggesting dynamic, wave-like expression kinetics (S11 Fig). A total of 246 genes  
377 were differentially expressed (S7 Table) between stage A and stage B; the vast majority of these  
378 (242) were up-regulated in stage B. In stage A, three of the four genes that were up-regulated  
379 encode candidate secreted effector proteins (CSEPs), and the fourth encodes a carbohydrate  
380 active enzyme (CAZyme) similar to an extracellular chitosanase (*Zt09\_chr\_11\_00040*). This gene  
381 is significantly down-regulated or not expressed during later infection (stages B to D), suggesting  
382 a role of the enzyme during early establishment in the leaf, similar to the role of a homolog  
383 described in *Fusarium solani* [66]. Another gene (*Zt09\_chr\_6\_00402*) that was strongly up-  
384 regulated in all isolates during early infection encodes a putative hsp30-like small heat shock  
385 protein, possibly reflecting a response to stressful environmental conditions on the wheat leaf  
386 surface [67].

387 The 242 genes up-regulated during biotrophic colonization are enriched with Gene Ontology (GO)  
388 groups involved in proteolysis (GO:0006508; 27 genes) and amino acid transmembrane transport  
389 (GO:0003333; 5 genes) ( $P < 0.01$ , Fischer's exact test). Furthermore, three previously  
390 characterized LysM homologs [51] and two homologs (*Zt09\_chr\_11\_00358*, *Zt09\_chr\_13\_00167*) of  
391 *Ecp2*, an effector gene of the tomato-infecting fungus *Cladosporium fulvum* [68], are also strongly  
392 up-regulated during early infection, emphasizing the importance of these genes for biotrophic  
393 colonization. PFAM domain analysis further shows enrichment of genes encoding cytochrome  
394 P450- and polyketide synthase-like proteins that possibly play a role in the production of  
395 secondary metabolites ( $P < 0.001$ ,  $\chi^2$  test).



396 In stage B, 22 genes are up-regulated compared to stage C (S8 Table), including four genes  
397 encoding CSEPs of unknown function and a gene encoding the putative non-secreted catalase  
398 *Zt09\_chr\_6\_00289*. Metabolite profiling showed that oxidative catabolism of lipids plays an  
399 important role for *Z. tritici* during biotrophic colonization [63]. High catabolic activity in the  
400 peroxisome entails accumulation of H<sub>2</sub>O<sub>2</sub>, which likely requires high abundance of catalase to  
401 maintain cellular redox homeostasis. *Zt09\_chr\_10\_00421* is also highly expressed during  
402 biotrophic growth and down-regulated at later infection stages. It encodes a protein similar to  
403 siderophore iron transporter 1, previously described to be involved in the uptake of iron [69]  
404 which is essential for fungal growth and pathogenesis [70].

405 In stage C, 334 genes are significantly up-regulated compared to stage B (S8 Table) and 58 genes  
406 in comparison to stage D (S9 Table). Genes up-regulated from B to C are enriched with GO groups  
407 involved in metabolic processes (GO:0008152; 97 genes), in particular L-arabinose metabolic  
408 processes (GO:0046373; 4 genes), and transmembrane transport (GO:0055085; 25 genes).  
409 Similarly, a PFAM analysis shows an enrichment of genes encoding transporters; CAZymes  
410 including different groups of glycosyl hydrolases, serine hydrolases, alpha-L-  
411 arabinofuranosidases and cutinases that play important roles as plant tissue and cell wall  
412 degrading enzymes [71]; polyketide synthases; and cytochrome P450s. This transcriptional  
413 reprogramming reflects the physiological changes that *Z. tritici* undergoes during the transition  
414 from biotrophic to necrotrophic growth and is consistent with our microscopic observations.  
415 Among the 58 genes down-regulated from C to D (S9 Table) we identified GO groups involved in  
416 arabinan metabolic processes (GO:0031221; one gene) and an enrichment of PFAM domains  
417 related to beta-ketoacyl-ACP synthases, which are known to be involved in fatty acid production  
418 and important for the generation of new cell membrane, as well as cytochrome P450s, polyketide  
419 synthases, hydrophobic surface binding protein A [72], and tyrosinases.

420 Only 16 genes were significantly up-regulated from stage C to D, which is when the pycnidia  
421 mature (S9 Table), indicating overall similar transcription profiles during the two necrotrophic  
422 stages. Genes that are up-regulated during necrotrophic growth and reproduction are predicted

423 to encode proteins similar to CAZymes, transporters, and proteins containing RNA-binding  
424 domains. Up-regulation of the secreted catalase-like protein-encoding gene *Zt09\_chr\_5\_00821*  
425 shows the importance of detoxification of the ROS H<sub>2</sub>O<sub>2</sub>, which is highly abundant in necrotic leaf  
426 tissue as shown by DAB staining (Fig 2B).

427 In summary, we identified a core set of genes that show the same expression pattern in the three  
428 isolates during infection development. This core set includes genes encoding putative effectors as  
429 well as enzymes predicted to play a role in the breakdown and metabolism of plant cell  
430 components.

431

### 432 **Core biotrophic and necrotrophic effector candidates with shared expression** 433 **profiles in *Z. tritici* isolates**

434 Given their importance in plant-pathogen interactions, we particularly focused our analyses on  
435 genes encoding candidate secreted effector proteins (CSEPs) [73]. CSEP genes are significantly  
436 enriched among the core differentially expressed genes ( $P \leq 2.7 \times 10^{-13}$ , Fischer's exact tests) (Fig  
437 4A), indicating highly dynamic expression profiles of many core effectors during all stages of  
438 wheat infection. We filtered the differentially expressed CSEP genes according to their expression  
439 profiles (S12 Fig, S13 Fig) to identify putative key genes for biotrophic and necrotrophic growth  
440 inside the host (Table 3 and 4).

441 During symptomless stage B, 78 CSEP genes are specifically up-regulated, highlighting that a large  
442 suite of *Z. tritici* effectors is induced after stomatal penetration and is required for biotrophic  
443 colonization of the mesophyll. We narrowed down these genes to 25 core biotrophic CSEP genes  
444 (Table 3, S12 Fig, S10 Table) that mostly encode hypothetical proteins and may have a role in  
445 bypassing host recognition. In comparison to Zt05 and Zt09, expression of the biotrophic effectors  
446 in Zt10 is lower during stage B, and expression profiles often greatly deviated during the other  
447 infection stages. This diverging expression phenotype likely reflects the strongly limited  
448 biotrophic colonization that we observed for Zt10 (Fig 3B).

449 Among the biotrophic CSEP genes is *MgNLP* (*Zt09\_chr\_13\_00229*) that encodes the necrosis and  
 450 ethylene-inducing peptide 1-like protein MgNLP in *Z. tritici* [74]. *MgNLP* is strongly expressed  
 451 before the transition to necrotrophy in wheat; however it only induces necrosis in dicots and its  
 452 role in *Z. tritici* is still unknown [74,75].

453 A set of 35 CSEP genes are specifically up-regulated at stage C (S13 Fig) and represent candidates  
 454 for necrotrophic core effectors (Table 4, S11 Table). These genes may be involved in the transition  
 455 from biotrophic to necrotrophic growth and the induction of necrosis. 9 CSEP genes encode  
 456 putative plant cell wall degrading enzymes and cutinase-like proteins, demonstrating that the  
 457 lifestyle switch to necrotrophy involves intensified degradation of plant tissue and cell wall  
 458 components. The gene *Zt09\_chr\_9\_00038* encodes a putative hydrophobin; hydrophobins are  
 459 small fungal-specific proteins with various functions [76], such as formation of a protective  
 460 surface layer on hyphae and conidia [77] or as toxins in plant-pathogen interactions [78]. Further,  
 461 *Zt09\_chr\_7\_00263* encodes a putative secreted metalloprotease, which are known fungal virulence  
 462 factors in animal pathogens [79] and are significantly induced during the transition to  
 463 necrotrophy in the hemibiotrophic anthracnose-causing *Colletotrichum higginsianum* [80]. In  
 464 *Fusarium verticillioides* and *F. oxysporum* f. sp. *lycopersici*, the secreted metalloproteases Fv-cmp  
 465 and FoMep1 cleave antifungal extracellular host chitinases [81,82].

466

467 **Table 3. *Z. tritici* core biotrophic effector candidate genes**

|                                                  |                                                                                                                                                                                                    |                                |              |                     |
|--------------------------------------------------|----------------------------------------------------------------------------------------------------------------------------------------------------------------------------------------------------|--------------------------------|--------------|---------------------|
| <b>Criteria</b>                                  | <ul style="list-style-type: none"> <li>Significantly up-regulated at stage B</li> <li>Lower/No expression during stage C and D</li> <li>FPKM stage B &gt; FPKM stage C in Zt05 and Zt09</li> </ul> |                                |              |                     |
| <b>Expression profiles</b>                       |                                                                                                                                                                                                    |                                |              |                     |
| <b>Putative functions</b>                        | <ul style="list-style-type: none"> <li>Bypass host recognition during biotrophic colonization</li> </ul>                                                                                           |                                |              |                     |
| <b>Candidate genes</b>                           | 25 (S12 Fig)                                                                                                                                                                                       |                                |              |                     |
| <b>Candidates encoding hypothetical proteins</b> | 23 (S10 Table)                                                                                                                                                                                     |                                |              |                     |
|                                                  | Gene                                                                                                                                                                                               | Function/Functional prediction | PFAM domains | GO terms associated |

|                                           |                                               |                                                                     |         |                                                         |
|-------------------------------------------|-----------------------------------------------|---------------------------------------------------------------------|---------|---------------------------------------------------------|
| <b>Candidates with predicted function</b> | <i>MgNLP</i> [74]<br><i>Zt09_chr_13_00229</i> | necrosis and ethylene-inducing peptide 1-like protein MgNLP [74,75] | PF05630 | GO:0008150;<br>GO:0003674;<br>GO:0005575                |
|                                           | <i>Zt09_chr_2_00129</i>                       | hypothetical protein, secreted phospholipase A2 precursor           | PF06951 | GO:0004623;<br>GO:0005509;<br>GO:0005576;<br>GO:0016042 |

468 Summary of core *Z. tritici* biotrophic effector candidate genes that were identified based on their  
 469 specific expression profiles within the *Z. tritici* core transcriptional program during wheat  
 470 infection. Functional annotation, PFAM, and GO term information from [59].

471

472 **Table 4. *Z. tritici* core necrotrophic effector candidate genes**

|                                                  |                                                                                                                                           |                                                                                |                                 |                                                         |
|--------------------------------------------------|-------------------------------------------------------------------------------------------------------------------------------------------|--------------------------------------------------------------------------------|---------------------------------|---------------------------------------------------------|
| <b>Criteria</b>                                  | <ul style="list-style-type: none"> <li>Significantly up-regulated at stage C</li> <li>Lower/No expression during stage A and B</li> </ul> |                                                                                |                                 |                                                         |
| <b>Expression profiles</b>                       |                                                                                                                                           |                                                                                |                                 |                                                         |
| <b>Putative functions</b>                        | <ul style="list-style-type: none"> <li>Facilitate transition from biotrophy to necrotrophy</li> <li>Induction of necrosis</li> </ul>      |                                                                                |                                 |                                                         |
| <b>Candidate genes</b>                           | 35 (S13 Fig)                                                                                                                              |                                                                                |                                 |                                                         |
| <b>Candidates encoding hypothetical proteins</b> | 24 (S11 Table)                                                                                                                            |                                                                                |                                 |                                                         |
| <b>Candidates with predicted function</b>        | Gene                                                                                                                                      | Functional prediction                                                          | PFAM domains                    | GO terms associated                                     |
|                                                  | <i>Zt09_chr_3_00584</i>                                                                                                                   | PCWDE, similar to alpha-1, Glycosyl transferases group 1                       | PF00128;<br>PF00534;<br>PF08323 | GO:0003824;<br>GO:0043169;<br>GO:0005975;<br>GO:0009058 |
|                                                  | <i>Zt09_chr_9_00308</i>                                                                                                                   | PCWDE, similar to carbohydrate-binding module family 63 protein, expansin-like |                                 | GO:0008150;<br>GO:0003674;<br>GO:0005575                |
|                                                  | <i>Zt09_chr_3_01063</i>                                                                                                                   | PCWDE, similar to pectate lyase                                                | PF00544                         | GO:0008150;<br>GO:0003674;<br>GO:0005575                |
|                                                  | <i>Zt09_chr_12_00112</i>                                                                                                                  | cutinase-like protein                                                          | PF01083                         | GO:0050525;<br>GO:0016787;<br>GO:0005576;<br>GO:0008152 |
|                                                  | <i>Zt09_chr_2_00663</i>                                                                                                                   | similar to Chain A, cutinase-like protein                                      | PF01083                         | GO:0050525;<br>GO:0016787;<br>GO:0005576;<br>GO:0008152 |

|  |                          |                                                                                      |         |                                          |
|--|--------------------------|--------------------------------------------------------------------------------------|---------|------------------------------------------|
|  | <i>Zt09_chr_2_01151</i>  | PCWDE, similar to acetyl xylan esterase,                                             | PF01083 | GO:0016787;<br>GO:0008152                |
|  | <i>Zt09_chr_6_00446</i>  | PCWDE, similar to acetyl xylan esterase,                                             | PF01083 | GO:0016787;<br>GO:0008152                |
|  | <i>Zt09_chr_10_00107</i> | PCWDE, similar to glycoside hydrolase family 12 protein                              | PF01670 | GO:0008810;<br>GO:0004553;<br>GO:0000272 |
|  | <i>Zt09_chr_2_01205</i>  | PCWDE, similar to putative extracellular cellulase CelA/allergen Asp F7-like protein | PF03330 | GO:0008150;<br>GO:0003674;<br>GO:0005575 |
|  | <i>Zt09_chr_6_00626</i>  | similar to metalloprotease                                                           | PF05572 | GO:0008237                               |
|  | <i>Zt09_chr_9_00038</i>  | similar to hydrophobin                                                               | PF06766 | GO:0005576                               |

473 Summary of core *Z. tritici* necrotrophic effector candidate genes that were identified based on  
 474 their specific expression profiles within the *Z. tritici* core transcriptional program during wheat  
 475 infection. PCWDE = putative plant cell wall degrading enzyme. Functional annotation, PFAM, and  
 476 GO term information from [59].

477

#### 478 **Isolate-specific transcriptional changes during wheat infection**

479 The 597 genes that we identified as differentially expressed between the stages show the same  
 480 regulatory profile in each of the three isolates and we consider them as part of the core *Z. tritici*  
 481 transcriptional infection program. However, we observed that transcript levels of many genes  
 482 strongly deviate between the isolates within an infection stage.

483 To further study how the infection phenotypes of the *Z. tritici* isolates relate to differences in gene  
 484 expression, we compared expression profiles during the infection stages (Fig 4B). In total, 2,377  
 485 (~22.8%) of the 10,426 shared genes are differentially expressed between the *Z. tritici* isolates  
 486 during wheat infection (Table 5, S12 and S13 Tables), suggesting a high extent of redundancy and  
 487 flexibility in the transcriptional program of *Z. tritici* during infection.

488 For all isolate comparisons, the identified differentially expressed genes are significantly enriched  
 489 in CSEP genes ( $P \leq 1.18 \times 10^{-7}$ , Fischer's exact tests) (Fig 4B) indicating isolate-specific effector  
 490 transcriptional profiles (S14 Table). Figure 5 summarizes the expression kinetics of five CSEP  
 491 genes in the three isolates during the four infection stages. These examples illustrate the  
 492 differentiated expression profiles of CSEP genes in *Z. tritici* isolates during wheat infection (Fig 5)

493 They encode one hypothetical effector (*Zt09\_chr\_12\_00427*) and secreted proteins with various  
 494 functions, including a hydrophobin (*Zt09\_chr\_9\_00020*), a DNase (*Zt09\_chr\_2\_01162*), and the  
 495 ribonuclease *Zt6* (*Zt09\_chr\_3\_00610*), which possesses ribotoxin-like activity and is cytotoxic  
 496 against plants and various microbes [83]. Among them, there is also a gene (*Zt09\_chr\_4\_00039*)  
 497 encoding a protein with homology to the phytotoxin cerato-platanin that was shown to induce  
 498 necrosis and defense responses in the plant pathogen *Ceratocystis fimbriata* [84]. During all  
 499 infection stages, *Zt09\_chr\_4\_00039* is significantly higher expressed in Zt09 than in Zt10, as well  
 500 as during stages B and D in comparison to Zt05 and might contribute to the higher necrosis levels  
 501 caused by Zt09 (Fig 1A).

502 In addition to the differences in the expression of CSEP genes, we also noted isolate-specific  
 503 expression patterns for genes located on accessory chromosomes. For example, three neighboring  
 504 genes located on chromosome 19 in Zt09 (*Zt09\_chr\_19\_00071*, *Zt09\_chr\_19\_00072*, and  
 505 *Zt09\_chr\_19\_00073*) are significantly higher expressed in Zt10 during all four infection stages (S14  
 506 Fig, S13 Table), and other genes located ~70 kb downstream are likewise specifically up-  
 507 regulated in Zt10 compared to one or both of the other isolates. In Zt10, these genes are located  
 508 on unitig 16, which is syntenic to the accessory chromosome 19 of Zt09. However, transposable  
 509 elements (RLG elements) are located downstream of *Zt09\_chr\_19\_00072* and upstream of  
 510 *Zt09\_chr\_19\_00073* in Zt09, and these are not present within the vicinity of these genes on unitig  
 511 16 in Zt10. Instead, the right arm of unitig 16 of Zt10 (~100 MB) is inverted compared to Zt09 and  
 512 Zt05, and the inversion starts up-stream of the gene *Zt09\_chr\_19\_00073*, reflecting a significant  
 513 sequence variation in the accessory chromosomes.

514

515 **Table 5. Genes with isolate-specific expression profiles during wheat infection**

|                                                         |                                                                                                                    |            |                        |
|---------------------------------------------------------|--------------------------------------------------------------------------------------------------------------------|------------|------------------------|
| <b>Genes differentially expressed between isolates*</b> | <ul style="list-style-type: none"> <li>• 2,377 genes in total</li> <li>• 22.8% of all 10,426 core genes</li> </ul> |            |                        |
|                                                         | Comparison (all four stages)                                                                                       | DE genes** | Regulation             |
|                                                         | Zt05 - Zt09                                                                                                        | 1,311      | ↑Zt05: 917 ↑Zt09: 436  |
|                                                         | Zt05 - Zt10                                                                                                        | 1,482      | ↑Zt05: 1086 ↑Zt10: 412 |

|                                          |                                       |                       |                        |
|------------------------------------------|---------------------------------------|-----------------------|------------------------|
|                                          | Zt09 - Zt10                           | 1,514                 | ↑Zt09: 1062 ↑Zt10: 541 |
| <b>GO groups enriched***</b>             | GO term                               | DE genes in GO group  | GO ID                  |
|                                          | transmembrane transport               | 159 (of 491)          | GO:0055085             |
|                                          | carbohydrate metabolic process        | 82 (of 242)           | GO:0005975             |
|                                          | proteolysis                           | 64 (of 237)           | GO:0006508             |
|                                          | amino acid transmembrane transport    | 17 (of 36)            | GO:0003333             |
|                                          | oxidation-reduction process           | 159 (of 627)          | GO:0055114             |
|                                          | lipid catabolic process               | 6 (of 15)             | GO:0016042             |
| <b>Candidate secreted effector genes</b> | • 245 of 370 effector candidate genes |                       |                        |
|                                          | Comparison (all four stages)          | DE effector genes**** | Regulation             |
|                                          | Zt05 - Zt09                           | 161                   | ↑Zt05: 120 ↑Zt09: 50   |
|                                          | Zt05 - Zt10                           | 167                   | ↑Zt05: 141 ↑Zt10: 31   |
|                                          | Zt09 - Zt10                           | 193                   | ↑Zt09: 167 ↑Zt10: 60   |

516 Summary of genes that are differentially expressed between the three *Z. tritici* isolates Zt05, Zt09,  
517 and Zt10 during the four infection stages. \*Differentially expressed genes identified by DESeq2,  
518  $P_{adj} \leq 0.01$ ,  $|\log_2 \text{fold change}| \geq 2$ . \*\*774 genes are differentially expressed in at least two isolate  
519 comparisons. \*\*\*Gene Ontology (GO) group enrichment analyses by topGO for ontology  
520 “Biological Process”,  $P \leq 0.01$ . \*\*\*\*198 effector candidate genes are differentially expressed in at  
521 least two isolate comparisons. DE = differentially expressed. ↑ = significantly up-regulated in the  
522 isolate.

523

## 524 **Transposable elements are associated with the differentially expressed genes**

525 Detailed analyses of the *Z. tritici* transcriptomes revealed considerable variation in the  
526 transcriptional landscapes among isolates. The extent of genetic differentiation between Zt05,  
527 Zt09, and Zt10 likely accounts for much of the transcriptional variation in the form of SNPs in  
528 regulatory sequences. However, other layers of gene regulation may also contribute to the  
529 heterogeneous transcriptional landscapes. We hypothesized that epigenetic transcriptional  
530 regulation, such as co-regulation of sequences associated with transposable elements, could  
531 impact gene expression variation. In a previous study, we showed that transposable elements and

532 the accessory chromosomes of *Z. tritici* are enriched with the histone modifications H3K9me3 and  
533 H3K27me3, which are associated with repressive regions of chromatin [85]. In *Fusarium*  
534 *graminearum*, the histone modification H3K27me3 is associated with gene clusters encoding  
535 secondary metabolites and pathogenicity-related traits [86]. It is possible that variation in the  
536 distribution of histone modifications like H3K27me3 across the genome sequences of Zt05, Zt09,  
537 and Zt10 contributes to the dramatic variation in expression phenotypes.

538 To test this, we assessed the distances of all genes to the closest annotated transposable element.

539 In the genomes of all three isolates, we found that isolate-specific differentially expressed genes

540 are located significantly closer to transposable elements than genes that were not differentially

541 expressed (Mann-Whitney U tests,  $P < 2.2 \times 10^{-16}$ ). Within the differentially expressed genes,

542 isolate-specific up-regulated genes (genes that are significantly up-regulated in one isolate in

543 contrast to the others) are significantly enriched within a distance of 2 kb to transposable

544 elements in Zt05 and Zt09 (Fisher's exact tests,  $p \leq 0.0094$ ), but not in Zt10. We note however,

545 that the transposable element annotation in Zt10 is not as complete as in Zt05 and Zt09 as it was

546 based on the Illumina short read assembly which is 6.7 Mb smaller than the *de novo* genome

547 assembly of SMRT Sequencing reads. We also analyzed the *in vitro* histone 3 methylation data for

548 Zt09 [85] and found that differentially expressed genes are indeed significantly closer to

549 H3K9me3 and H3K27me3 peaks (Mann-Whitney U tests,  $P < 2.2 \times 10^{-16}$ ). Further, we observed

550 significant enrichment of genes significantly up-regulated in Zt09 in comparison to Zt05 and Zt10

551 within a distance of 2 kb to H3K9me3 and H3K27me3 peaks (Fisher's exact tests,  $P \leq 1.55 \times 10^{-15}$ ),

552 but down-regulated genes were only enriched in the vicinity of H3K27me3 peaks (distance  $\leq 2$  kb,

553 Fisher's exact test,  $P = 1.35 \times 10^{-15}$ ). Poor transcription of genes located on the accessory

554 chromosomes was explained by enrichment of H3K27me3 covering the entire chromosomes and

555 H3K9me3, which is mostly associated with repetitive DNA [85]. Our findings indicate that during

556 host infection chromatin state of repeat-rich genome compartments is highly dynamic and

557 changes between "active" euchromatin and "repressive" heterochromatin, as suggested in

558 *Leptosphaeria maculans* [87]. Further, our observation suggests that the fine-scale distribution of



559 epigenetic marks likely differs between the genomes of *Z. tritici* isolates and contributes to the  
560 isolate-specific gene expression phenotypes that we observed. To further visualize the  
561 transcriptional landscape across the three *Z. tritici* genomes, we calculated expression values  
562 (FPKM) of 1 kb windows (S6 Table) and plotted them in heatmaps along the chromosomes and  
563 unitigs (S15-S17 Figs). This approach allows visualization of the transcriptional landscapes at a  
564 high resolution and resulted in the identification of heterogeneous gene expression patterns  
565 across chromosomes, such as chromosome 19 in Zt10 (S17 Fig), and suggests conservation of  
566 previously identified patterns. Almost no loci on the right arm of chromosome 7 were transcribed  
567 in Zt05, Zt09, and Zt10 (S16 Fig), as was previously found in Zt09 and IPO323 [30,63]. This  
568 chromosomal segment has characteristics of an accessory chromosome, as it is significantly  
569 enriched with H3K27me3 that mediates transcriptional silencing [85]. While syntenic  
570 chromosomal regions generally have a similar composition of transcribed and silenced loci, the  
571 fine-scale distribution of transcriptional cold- and hot-spots is clearly different between the  
572 genomes of the three isolates studied.

573

574

## 575 **Conclusion**

576 We conducted a detailed comparison of infection phenotypes of three pathogenic *Z. tritici* isolates  
577 that are equally virulent in a susceptible host genotype and show an unexpectedly high extent of  
578 plasticity in the infection program of a fungal plant pathogen. The three isolates differ significantly  
579 in their genomic composition, and we show that the genetic variation of the three isolates  
580 translates into highly distinct infection phenotypes that deviate temporally and spatially. The  
581 transcriptional programs associated with host colonization show a high degree of variability  
582 between the three isolates: more than 20% of the core genes are differentially expressed between  
583 the three *Z. tritici* isolates during the four infection stages. This suggests strong redundancy in the  
584 *Z. tritici* “infection program” between isolates. Effector candidates are enriched among the  
585 differentially expressed genes, suggesting that the three isolates employ different molecular

586 strategies to manipulate host defenses. Strikingly, highly variable infection programs result in the  
587 same level of virulence, showing that “host specialization” in *Z. tritici* involves a very flexible  
588 strategy to exploit wheat tissue for growth and reproduction. As necrotic lesions are usually  
589 composed of several distinct *Z. tritici* genotypes, it is highly relevant to investigate whether strains  
590 in one lesion have similar or different infection phenotypes. Various infection strategies within a  
591 lesion could complement each other or, in contrast, have antagonistic effects and facilitate  
592 competition.

593 An intriguing question that emerges from our analyses is which factors cause deviation in gene  
594 expression phenotypes in *Z. tritici*. Genetic variants associated with transcriptional regulation  
595 likely contribute to differences in gene regulation. However, we hypothesize that variation in  
596 epigenetic traits promotes different transcriptional programs. Genome-wide patterns of  
597 transcriptional activity (S15-S17 Figs) indeed suggest some variation in the physical distribution  
598 of transcriptionally active and silent regions, which may result from distinct epigenetic landscapes  
599 related to histone modifications or DNA methylation.

600 We hypothesize that highly diverging infection phenotypes are not exclusive among isolates of  
601 *Z. tritici* and are likely found in populations of other pathogens that retain high levels of genetic  
602 diversity. Variation in infection and expression profiles contributes another layer of  
603 polymorphism to pathogen populations and may be important for the pathogen to rapidly adjust  
604 to environmental changes. Hence, the resulting diversity of infection phenotypes needs to be  
605 acknowledged to understand pathogen evolution and develop sustainable crop protection  
606 strategies.

## 607 **Materials and Methods**

### 608 **Isolates and growth conditions**

609 Cells of *Zymoseptoria tritici* isolates (S1 Table) were inoculated from glycerol stocks onto YMS  
610 agar (0.4% [w/v] yeast extract, 0.4% [w/v] malt extract, 0.4% [w/v] sucrose, 2% [w/v] bacto  
611 agar) and grown at 18°C for 5 days. Single cells were grown in liquid YMS (200 rpm, 18°C) for 2  
612 days and harvested by centrifugation (3500 rpm for 10 min).

613

### 614 **Plant infection experiments**

615 For all plant infection experiments, we used 14-day-old seedlings of the winter wheat (*Triticum*  
616 *aestivum*) cultivar Obelisk (Wiersum Plantbreeding, Winschoten, Netherlands). The fungal  
617 inoculum was adjusted to  $1 \times 10^8$  cells/mL in 0.1% [v/v] Tween 20 (Roth, Karlsruhe, Germany)  
618 and brushed onto labeled areas (8 to 12 cm) of the second leaf of each plant. The same treatment  
619 without fungal cells was conducted for mock controls. After inoculation, plants were incubated at  
620 22°C [day]/20°C [night] and 100% humidity with a 16-h light period for 48 h. Then, humidity was  
621 reduced to 70%. Plants were grown for 3 or 4 weeks after inoculation, depending on the  
622 experiment.

623

### 624 ***In planta* phenotypic assays**

625 To compare quantitative virulence of Zt05, Zt09, and Zt10 on wheat, we performed three  
626 independent, randomized infection experiments with blinded inoculation and evaluation.  
627 Inoculated leaf areas of 460 leaves were evaluated at 28 days post infection (dpi) by scoring the  
628 observed disease symptoms based on the percentage of leaf area covered by necrosis and pycnidia  
629 as previously described [88]. We differentiated six categories: 0 (no visible symptoms), 1 (1-20%),  
630 2 (21-40%), 3 (41-60%), 4 (61-80%), and 5 (81-100%). Statistical differences were evaluated by  
631 Mann-Whitney *U* test considering differences significant if  $P \leq 0.01$ .

632 To compare the temporal development of disease, we manually inspected 40 inoculated leaves  
633 between 9 and 27 dpi and registered the occurrence of first visible symptoms every two days.  
634 Individual leaves were visualized using a Leica S8APO equipped with a Leica DFC450 camera.  
635 To localize accumulation of the reactive oxygen species H<sub>2</sub>O<sub>2</sub> within infected leaf tissue, we  
636 conducted 3,3'-diaminobenzidine (DAB) staining [89] at 4, 10, 14, 18, and 21 dpi (S2 Text). The  
637 presence of H<sub>2</sub>O<sub>2</sub> is indicated by reddish-brown precipitate in cleared leaves. Samples were  
638 documented before (iPhone 7 camera) and after (Canon EOS 600D) staining.

639

#### 640 **Phenotypic assays *in vitro***

641 To compare tolerance towards stress conditions and assess the *in vitro* phenotypes of the *Z. tritici*  
642 isolates, we conducted a stress assay as previously described [88]. After five days, we compared  
643 growth on solid YMS medium at 18°C to growth on YMS medium exposed to stress conditions:  
644 temperature (20/22°C with 16-h day/8-h night rhythm, 28°C in darkness), oxidative stress (2 and  
645 3 mM H<sub>2</sub>O<sub>2</sub>), osmotic stress (1 M NaCl, 1 M sorbitol), and cell wall stress (500 µg/mL Congo red,  
646 200 µg/mL calcofluor white). Colony development was documented using a Canon EOS 600D.  
647 Each stress treatment was replicated three times.

648

#### 649 **Analysis of *Z. tritici* wheat infection by confocal microscopy**

650 Structures of *Z. tritici* isolates inside and on the surface of wheat leaves were analyzed by confocal  
651 laser scanning microscopy. We harvested infected wheat leaves at 3-5, 7, 8, 10-14, 17, 19-21, 25,  
652 and 28 dpi and analyzed the interactions between fungal hyphae and wheat tissue. Likewise, we  
653 analyzed infected leaves to determine the infection stage of leaf samples used for RNA extraction  
654 (see below). In total, we studied 37 infected wheat leaves for Zt05, 34 for Zt09, and 30 for Zt10,  
655 analyzed at least 15 infection events per leaf sample by confocal microscopy, and created a total  
656 of 113 confocal image z-stacks. Cleared leaf material was stained with wheat germ agglutinin  
657 conjugated to fluorescein isothiocyanate (WGA-FITC) in combination with propidium iodide (PI)  
658 (S2 Text for staining protocol). Microscopy was conducted using a Leica TCS SP5 (Leica

659 Microsystems, Germany) and a Zeiss LSM880 (Carl Zeiss Microscopy, Germany). FITC was excited  
660 at 488 nm (argon laser) and detected between 500-540 nm. PI was excited at 561 nm (diode-  
661 pumped solid-state laser) and detected between 600-670 nm. Image stacks were obtained with a  
662 x/y scanning resolution of 1024 x 1024 (Leica) or 1500 x 1500 pixels (Zeiss) and a step size of 0.5  
663 - 1  $\mu\text{m}$  in z. Analyses, visualization, and processing of image z-stacks were performed using Leica  
664 Application Suite Advanced Fluorescence (Leica Microsystems, Germany), ZEN black and Zen blue  
665 (Carl Zeiss Microscopy, Germany), and AMIRA® (FEI™ Visualization Science Group, Germany).  
666 Animations of image z-stacks are .avi format and can be played in VLC media player (available at  
667 <http://www.videolan.org/vlc/>).

668

### 669 **Transcriptome analyses of *Z. tritici* isolates during wheat infection**

670 High-quality total RNA from *Z. tritici*-infected wheat material was isolated using the TRIzol™  
671 reagent (Invitrogen, Karlsruhe, Germany) according to the manufacturer's instructions. Material  
672 of three wheat leaves was harvested synchronously, pooled, and immediately homogenized in  
673 liquid nitrogen. The resulting leaf powder (100 mg) was used for RNA extraction. Because our  
674 analyses revealed differences in the temporal development of infection between the isolates, we  
675 set up independent sampling schedules for each isolate to compare transcriptomes of the same  
676 infection stage (S4 Table). We collected infected leaf material at one to three determined time  
677 points and assigned infection stage based on examination of central sections (1 - 2 cm) of each leaf  
678 by confocal microscopy (S7 Fig). We determined the best representatives of each infection stage  
679 and chose two samples per isolate at each stage as biological replicates for transcriptome  
680 sequencing (Table 2). Preparation of strand-specific RNA-seq libraries including polyA  
681 enrichment was performed at the Max Planck Genome Center, Cologne, Germany  
682 (<http://mpgc.mpipz.mpg.de>) using the NEBNext Ultra™ Directional RNA Library Prep Kit for  
683 Illumina according to the manufacturer's protocol (New England BioLabs, Frankfurt/Main,  
684 Germany) with an input of 1  $\mu\text{g}$  total RNA. Sequencing, performed using an Illumina HiSeq 2500  
685 platform, generated strand-specific, 100-base, single-end reads with an average yield of 112

686 million reads per sample (S5 Table). We assessed the quality of sequencing data with *FastQC*  
687 v0.11.2 (<http://www.bioinformatics.babraham.ac.uk/projects/fastqc/>), removed residual  
688 TruSeq adapter sequences, and applied a stringent read trimming and quality filtering protocol  
689 using *FASTX-toolkit* v0.0.14 ([http://hannonlab.cshl.edu/fastx\\_toolkit/](http://hannonlab.cshl.edu/fastx_toolkit/)) and *Trimmomatic* [90]  
690 v0.33 (S3 Text for details). The resulting 88-bp reads were mapped against the genome of the  
691 respective *Z. tritici* isolate with *TopHat2* v2.0.9 [91]. Read alignments were stored in SAM format,  
692 and indexing, sorting, and conversion to BAM format was performed using SAMtools v0.1.19 [92].  
693 The relative abundance of transcripts for predicted genes was calculated in FPKM by *Cuffdiff2*  
694 v2.2.1 [93]. Total raw read counts per gene were estimated with *HTSeq* v0.6.1p1 using union mode  
695 [94]. Gene coordinates in the Zt05 (S15 Table) and Zt10 (S16 Table) genomes were obtained by  
696 mapping the predicted genes of IPO323 using nucleotide BLAST alignments (e-value cutoff  $1e^{-3}$ ,  
697 identity  $\geq 90\%$ , query coverage between 90% and 110%). Differential gene expression analyses  
698 between *Z. tritici* infection stages and isolates were performed in R using the Bioconductor  
699 package *DESeq2* v1.10.1 [95]. Significantly differentially expressed genes were determined with  
700  $P_{\text{adj}} \leq 0.01$  and  $|\log_2 \text{fold-change}| \geq 2$ . The R package *topGO* [96] was used to perform Gene Ontology  
701 (GO) term enrichment analyses within the differentially expressed genes. *P* values for each GO  
702 term [59] were calculated using Fischer's exact test applying the *topGO* algorithm "weight01" that  
703 takes into account GO term hierarchy. We reported categories significant with  $P \leq 0.01$  for the  
704 ontology "Biological Process". PFAM domain enrichment analyses were performed using a custom  
705 python script, and *P* values were calculated using  $\chi^2$  tests. To analyze genomic distances between  
706 differentially expressed genes and transposable elements (TEs), we annotated TEs as described  
707 in [59] for Zt05 (S17 Table) and Zt10 (S18 Table) and used the published TE annotation of IPO323  
708 for Zt09 [59]. Distances between the genes of interest and the closest annotated TEs were  
709 calculated with *bedtools* v2.26 [97]. Likewise, we used ChIP-seq peak data [85] to calculate  
710 distances between genes and the closest H3K9me3 and H3K27me3 peaks. Statistical analyses  
711 were performed in R. For an overview of all programs and codes used to process and analyze  
712 transcriptome data, including the applied settings and parameters, see S3 Text.

## 713 **Pulsed-field gel electrophoresis**

714 A non-protoplast protocol (S2 Text) was used to produce DNA plugs for separation of small  
715 chromosomes (~0.2 to 1.6 Mb) by pulsed-field gel electrophoresis (PFGE) [98]. Chromosomal  
716 DNA of *Saccharomyces cerevisiae* (Bio-Rad) was used as standard size marker. Gels were stained  
717 for 30 min in 1 µg/mL ethidium bromide solution, and chromosome bands were detected with  
718 Thyphoon Trio™ (GE).

719

## 720 ***De novo* genome assemblies of *Z. tritici* isolates Zt05 and Zt10 and synteny analyses**

721 High molecular weight DNA of Zt05 and Zt10 was extracted from single cells grown in liquid YMS,  
722 using a modified version of the cetyltrimethylammonium bromide (CTAB) extraction protocol  
723 [99], and used as input to prepare Pacific Biosciences (PacBio) SMRTbell libraries that were size-  
724 selected with a 10- to 15-kb cut-off. Single-molecule real-time (SMRT) sequencing was performed  
725 on four SMRT cells and run on a PacBio RS II instrument at the Max Planck Genome Center in  
726 Cologne, Germany (<http://mpgc.mpipz.mpg.de>). Genome assemblies of Zt05 and Zt10 based on  
727 the generated PacBio long reads were done as previously described [56] using *HGAP* [100] v3.0  
728 included in the *SMRTanalysis suite* v2.3.0. Briefly, we applied default settings for *HGAP* runs and  
729 tested the influence of different minimum seed read lengths (13 kb, 15 kb, 19 kb, and 21 kb) used  
730 for initiation of self-correction. A 19-kb minimum seed read length cut-off generated the most  
731 favorable results in terms of pre-assembly yield, assembly N50, and length of total assembly.  
732 Assembled unitigs were polished by applying default settings of *Quiver*, which is part of the  
733 *SMRTanalysis suite*. Unitigs in which median PacBio read coverage deviated more than a factor of  
734 1.5X from all contigs were removed from the final assemblies. Synteny of *Z. tritici* reference strain  
735 IPO323 and the Zt05 and Zt10 unitigs was compared using SyMAP [101] v4.2 applying default  
736 settings and considering all unitigs  $\geq 1,000$  kb (Zt05) and  $\geq 10,000$  kb (Zt10). To estimate the  
737 amount of unique DNA in Zt05 and Zt10 in comparison to IPO323 and Zt09 respectively, we  
738 generated pairwise genome alignments with *Mugsy* v1.r2.2 [102] applying default settings.

739 Alignments were analyzed using a custom python script to extract unique DNA blocks with a  
740 minimum length of 1 bp.

741

## 742 **Data availability**

743 All generated RNA-seq datasets have been deposited at the NCBI Gene Expression Omnibus and  
744 are accessible with the accession number GSE106136. *De novo* genome assemblies of isolates Zt05  
745 and Zt10 are available under accession numbers PEBP000000000 and PEBO000000000. The  
746 genome sequence of the reference isolate IPO323 used for transcriptome analysis of Zt09 is  
747 available at: <http://genome.jgi.doe.gov/Mycgr3/Mycgr3.home.html>. Genome assemblies based  
748 on whole genome shotgun sequencing (Illumina) were also used; the assembly for Zt10 is  
749 available at GenBank (Zt10 = STIR04\_A26b) GCA\_000223645.2. Sequencing data and assembly for  
750 Zt05 (Zt05 = MgDk09\_U34) are available through NCBI BioProject PRJNA312067 [57].

751

752

## 753 **Acknowledgements**

754 We thank Ronny Kellner for insightful comments to a previous version of this manuscript, Julien  
755 Y. Dutheil for support with comparative transcriptome analyses and Petra Happel for help with  
756 the *in vitro* stress assays.

757

## 758 **Funding statement**

759 This work was supported by intramural funding of the Max Planck Society and a personal grant  
760 from the State of Schleswig-Holstein to Eva H. Stukenbrock. The funders had no role in study  
761 design, data collection and analyses, decision to publish, or preparation of the manuscript.

762

## 763 **Author contributions**

764 Conceptualization: JH, EHS. Investigation: JH, MM, HS. Genome and transcriptome sequencing data  
765 curation and analyses: JH, MM, CJE, JG, EHS. Confocal microscopy analyses and data visualization:  
766 JH, HA. Preparation and writing of manuscript: JH, EHS. Editing of manuscript: JH, MM, HS, EHS.

767



## 768 **References**

769

- 770 1. Möller M, Stukenbrock EH (2017) Evolution and genome architecture in fungal plant  
771 pathogens. *Nat Rev Microbiol* 15: 756–771.
- 772 2. Spanu PD, Abbott JC, Amselem J, Burgis TA, Soanes DM, et al. (2010) Genome Expansion  
773 and Gene Loss in Powdery Mildew Fungi Reveal Tradeoffs in Extreme Parasitism. *Science*  
774 330: 1543–1546.
- 775 3. Raffaele S, Farrer RA, Cano LM, Studholme DJ, MacLean D, et al. (2010) Genome Evolution  
776 Following Host Jumps in the Irish Potato Famine Pathogen Lineage. *Science* 330: 1540–  
777 1543.
- 778 4. Ma L-J, van der Does HC, Borkovich KA, Coleman JJ, Daboussi M-J, et al. (2010) Comparative  
779 genomics reveals mobile pathogenicity chromosomes in *Fusarium*. *Nature* 464: 367–373.  
780 doi:10.1038/nature08850.
- 781 5. Rouxel T, Grandaubert J, Hane JK, Hoede C, van de Wouw AP, et al. (2011) Effector  
782 diversification within compartments of the *Leptosphaeria maculans* genome affected by  
783 Repeat-Induced Point mutations. *Nat Commun* 2: 202.
- 784 6. Stukenbrock E, Dutheil JY (2017) Comparison of fine-scale recombination maps in fungal  
785 plant pathogens reveals dynamic recombination landscapes and intragenic hotspots.  
786 bioRxiv.
- 787 7. Xue M, Yang J, Li Z, Hu S, Yao N, et al. (2012) Comparative Analysis of the Genomes of Two  
788 Field Isolates of the Rice Blast Fungus *Magnaporthe oryzae*. *PLoS Genet* 8.  
789 doi:10.1371/journal.pgen.1002869.
- 790 8. Faino L, Seidl MF, Shi-Kunne X, Pauper M, Van Den Berg GCM, et al. (2016) Transposons  
791 passively and actively contribute to evolution of the two-speed genome of a fungal  
792 pathogen. *Genome Res* 26: 1091–1100. doi:10.1101/gr.204974.116.
- 793 9. Miao VP, Covert SF, VanEtten HD (1991) A fungal gene for antibiotic resistance on a  
794 dispensable (“B”) chromosome. *Science* 254: 1773–1776. doi:10.1126/science.1763326.
- 795 10. Balesdent M-H, Fudal I, Ollivier B, Bally P, Grandaubert J, et al. (2013) The dispensable  
796 chromosome of *Leptosphaeria maculans* shelters an effector gene conferring avirulence  
797 towards *Brassica rapa*. *New Phytol* 198: 887–898.
- 798 11. Raffaele S, Kamoun S (2012) Genome evolution in filamentous plant pathogens: why bigger  
799 can be better. *Nat Rev Microbiol* 10: 417–430.

- 800 12. Dalman K, Himmelstrand K, Olson Å, Lind M, Brandström-Durling M, et al. (2013) A  
801 genome-wide association study identifies genomic regions for virulence in the non-model  
802 organism *Heterobasidion annosum* s.s. PLoS One 8: e53525.
- 803 13. Cumagun CJR, Bowden RL, Jurgenson JE, Leslie JF, Miedaner T (2004) Genetic Mapping of  
804 Pathogenicity and Aggressiveness of *Gibberella zeae* (*Fusarium graminearum*) Toward  
805 Wheat. Phytopathology 94: 520–526. doi:10.1094/PHYTO.2004.94.5.520.
- 806 14. Lind M, Dalman K, Stenlid J, Karlsson B, Olson Å (2007) Identification of quantitative trait  
807 loci affecting virulence in the basidiomycete *Heterobasidion annosum* s.l. Curr Genet 52:  
808 35–44. doi:10.1007/s00294-007-0137-y.
- 809 15. Talas F, Kalih R, Miedaner T, McDonald BA (2016) Genome-Wide Association Study  
810 Identifies Novel Candidate Genes for Aggressiveness, Deoxynivalenol Production, and  
811 Azole Sensitivity in Natural Field Populations of *Fusarium graminearum*. Mol Plant-  
812 Microbe Interact 29: MPMI-09-15-0218.
- 813 16. Haueisen J, Stukenbrock EH (2016) Life cycle specialization of filamentous pathogens -  
814 colonization and reproduction in plant tissues. Curr Opin Microbiol 32: 31–37.
- 815 17. Wittenberg AHJ, van der Lee T a J, Ben M'barek S, Ware SB, Goodwin SB, et al. (2009)  
816 Meiosis drives extraordinary genome plasticity in the haploid fungal plant pathogen  
817 *Mycosphaerella graminicola*. PLoS One 4: e5863.
- 818 18. Goodwin SB, M'barek S Ben, Dhillon B, Wittenberg AHJ, Crane CF, et al. (2011) Finished  
819 genome of the fungal wheat pathogen *Mycosphaerella graminicola* reveals dispensome  
820 structure, chromosome plasticity, and stealth pathogenesis. PLoS Genet 7: e1002070.
- 821 19. Habig M, Quade J, Stukenbrock EH (2017) Forward genetics approach reveals host-  
822 genotype dependent importance of accessory chromosomes in the fungal wheat pathogen  
823 *Zymoseptoria tritici*. MBio: Forthcoming.
- 824 20. Lendenmann MH, Croll D, Stewart EL, McDonald B a (2014) Quantitative Trait Locus  
825 Mapping of Melanization in the Plant Pathogenic Fungus *Zymoseptoria tritici*. G3  
826 (Bethesda).
- 827 21. Lendenmann MH, Croll D, McDonald B a. (2015) QTL mapping of fungicide sensitivity  
828 reveals novel genes and pleiotropy with melanization in the pathogen *Zymoseptoria tritici*.  
829 Fungal Genet Biol 80: 53–67
- 830 22. Mirzadi Gohari A, Ware SB, Wittenberg AHJ, Mehrabi R, Ben M'Barek S, et al. (2015) Effector  
831 discovery in the fungal wheat pathogen *Zymoseptoria tritici*. Mol Plant Pathol 16: 931–945.

- 832 23. Stewart EL, Croll D, Lendenmann MH, Sanchez-Vallet A, Hartmann FE, et al. (2017) QTL  
833 mapping reveals complex genetic architecture of quantitative virulence in the wheat  
834 pathogen *Zymoseptoria tritici*. *Mol Plant Pathol*: 1–16. doi:10.1111/mpp.12515.
- 835 24. Hartmann FE, Sánchez-Vallet A, McDonald BA, Croll D (2017) A fungal wheat pathogen  
836 evolved host specialization by extensive chromosomal rearrangements. *ISME J*: 1189–  
837 1204.
- 838 25. Zhong Z, Marcel TC, Hartmann FE, Ma X, Plissonneau C, et al. (2017) A small secreted  
839 protein in *Zymoseptoria tritici* is responsible for avirulence on wheat cultivars carrying the  
840 *Stb6* resistance gene. *New Phytol* 214: 619–631.
- 841 26. Linde CC, Zhan J, McDonald B a (2002) Population Structure of *Mycosphaerella*  
842 *graminicola*: From Lesions to Continents. *Phytopathology* 92: 946–955.
- 843 27. Zhan J, Pettway RE, McDonald BA (2003) The global genetic structure of the wheat  
844 pathogen *Mycosphaerella graminicola* is characterized by high nuclear diversity, low  
845 mitochondrial diversity, regular recombination, and gene flow. *Fungal Genet Biol* 38: 286–  
846 297. doi:10.1016/S1087-1845(02)00538-8.
- 847 28. McDonald MC, McGinness L, Hane JK, Williams AH, Milgate A, et al. (2016) Utilizing Gene  
848 Tree Variation to Identify Candidate Effector Genes in *Zymoseptoria tritici*. *G3 (Bethesda)*  
849 6: 779–791.
- 850 29. Thygesen K, Jørgensen LN, Jensen KS, Munk L (2008) Spatial and temporal impact of  
851 fungicide spray strategies on fungicide sensitivity of *Mycosphaerella graminicola* in winter  
852 wheat. *Eur J Plant Pathol* 123: 435–447.
- 853 30. Kellner R, Bhattacharyya A, Poppe S, Hsu TY, Brem RB, et al. (2014) Expression Profiling of  
854 the Wheat Pathogen *Zymoseptoria tritici* Reveals Genomic Patterns of Transcription and  
855 Host-Specific Regulatory Programs. *Genome Biol Evol* 6: 1353–1365.
- 856 31. Stukenbrock EH, Banke S, Javan-Nikkhah M, McDonald B a (2007) Origin and domestication  
857 of the fungal wheat pathogen *Mycosphaerella graminicola* via sympatric speciation. *Mol*  
858 *Biol Evol* 24: 398–411.
- 859 32. Stewart EL, McDonald BA (2014) Measuring quantitative virulence in the wheat pathogen  
860 *Zymoseptoria tritici* using high-throughput automated image analysis. *Phytopathology*  
861 104: 985–992.
- 862 33. Heller J, Tudzynski P (2011) Reactive Oxygen Species in Phytopathogenic Fungi: Signaling,  
863 Development, and Disease. *Annu Rev Phytopathol Vol 49* 49: 369–390.

- 864 doi:10.1146/annurev-phyto-072910-095355.
- 865 34. Quaedvlieg W, Kema GHJ, Groenewald JZ, Verkley GJM, Seifbarghi S, et al. (2011)  
866 *Zymoseptoria* gen. nov.: a new genus to accommodate *Septoria*-like species occurring on  
867 graminicolous hosts. *Persoonia* 26: 57–69.
- 868 35. Lendenmann MH, Croll D, Palma-Guerrero J, Stewart EL, McDonald BA (2016) QTL  
869 mapping of temperature sensitivity reveals candidate genes for thermal adaptation and  
870 growth morphology in the plant pathogenic fungus *Zymoseptoria tritici*. *Heredity* (Edinb)  
871 116: 384–394.
- 872 36. Mehrabi R, Zwiers L-H, de Waard M a, Kema GHJ (2006) *MgHog1* regulates dimorphism  
873 and pathogenicity in the fungal wheat pathogen *Mycosphaerella graminicola*. *Mol Plant*  
874 *Microbe Interact* 19: 1262–1269.
- 875 37. Butler MJ, Day AW (1998) Fungal melanins : a review. *Can J Microbiol* 44: 1115–1136.
- 876 38. National Centers for Environmental Information: Climate Data Online Asia. Available:  
877 [https://www1.ncdc.noaa.gov/pub/data/wwr/documents/Asia/WWR\\_1991-](https://www1.ncdc.noaa.gov/pub/data/wwr/documents/Asia/WWR_1991-2000_tables.txt)  
878 [2000\\_tables.txt](https://www1.ncdc.noaa.gov/pub/data/wwr/documents/Asia/WWR_1991-2000_tables.txt).
- 879 39. Zhan J, McDonald BA (2011) Thermal adaptation in the fungal pathogen *Mycosphaerella*  
880 *graminicola*. *Mol Ecol* 20: 1689–1701. doi:10.1111/j.1365-294X.2011.05023.x.
- 881 40. Shetty NP, Mehrabi R, Lütken H, Haldrup A, Kema GHJ, et al. (2007) Role of hydrogen  
882 peroxide during the interaction between the hemibiotrophic fungal pathogen *Septoria*  
883 *tritici* and wheat. *New Phytol* 174: 637–647. doi:10.1111/j.1469-8137.2007.02026.x.
- 884 41. Shetty NP, Kristensen BK, Newmana MA, Møller K, Gregersen PL, et al. (2003) Association  
885 of hydrogen peroxide with restriction of *Septoria tritici* in resistant wheat. *Physiol Mol*  
886 *Plant Pathol* 62: 333–346. doi:10.1016/S0885-5765(03)00079-1.
- 887 42. Turrà D, El Ghalid M, Rossi F, Di Pietro A (2015) Fungal pathogen uses sex pheromone  
888 receptor for chemotropic sensing of host plant signals. *Nature* 527: 521–524.
- 889 43. Cohen L, Eyal Z, Aviv T (1993) The histology of processes associated with the infection of  
890 resistant and susceptible wheat cultivars with *Septoria tritici*. *Plant Pathol* 42: 737–743.  
891 doi:10.1111/j.1365-3059.1993.tb01560.x.
- 892 44. Kema GHJ, Yu D, Rijkenberg FHJ, Shaw MW, Baayen RP (1996) Histology of pathogenesis of  
893 *Mycosphaerella graminicola* in wheat. *Phytopathology* 7: 777–786. doi:10.1094/Phyto-86-  
894 777.
- 895 45. Becker M, Becker Y, Green K, Scott B (2016) The endophytic symbiont *Epichloe festucae*

- 896 establishes an epiphyllous net on the surface of *Lolium perenne* leaves by development of  
897 an expressorium, an appressorium-like leaf exit structure. *New Phytol* 211: 240–254.  
898 doi:10.1111/nph.13931.
- 899 46. Takahara H, Hacquard S, Kombrink A, Hughes HB, Halder V, et al. (2016) *Colletotrichum*  
900 *higginsianum* extracellular LysM proteins play dual roles in appressorial function and  
901 suppression of chitin-triggered plant immunity. *New Phytol* 211: 1323–1337.  
902 doi:10.1111/nph.13994.
- 903 47. Sánchez-Vallet A, Mesters JR, Thomma BPHJ (2015) The battle for chitin recognition in  
904 plant-microbe interactions. *FEMS Microbiol Rev* 39: 171–183.  
905 doi:10.1093/femsre/fuu003.
- 906 48. van den Burg H a, Harrison SJ, Joosten MHAJ, Vervoort J, de Wit PJGM (2006) *Cladosporium*  
907 *fulvum* Avr4 protects fungal cell walls against hydrolysis by plant chitinases accumulating  
908 during infection. *Mol Plant Microbe Interact* 19: 1420–1430.
- 909 49. de Jonge R, Peter van Esse H, Kombrink A, Shinya T, Desaki Y, et al. (2010) Conserved  
910 Fungal LysM Effector Ecp6 Prevents Chitin-Triggered Immunity in Plants. *Science* 329:  
911 953–955.
- 912 50. Sánchez-Vallet A, Saleem-Batcha R, Kombrink A, Hansen G, Valkenburg DJ, et al. (2013)  
913 Fungal effector Ecp6 outcompetes host immune receptor for chitin binding through  
914 intrachain LysM dimerization. *Elife* 2013: 1–16. doi:10.7554/eLife.00790.
- 915 51. Marshall R, Kombrink A, Motteram J, Loza-Reyes E, Lucas J, et al. (2011) Analysis of two in  
916 planta expressed LysM effector homologs from the fungus *Mycosphaerella graminicola*  
917 reveals novel functional properties and varying contributions to virulence on wheat. *Plant*  
918 *Physiol* 156: 756–769.
- 919 52. Lee W, Rudd JJ, Hammond-kosack KE, Kanyuka KK (2013) *Mycosphaerella graminicola*  
920 LysM effector-mediated stealth pathogenesis subverts recognition through both CERK1  
921 and CEBiP homologues in wheat. *Mol Plant Microbe Interact* 27: 236–243.
- 922 53. Jones JDG, Dangl JL (2006) The plant immune system. *Nature* 444: 323–329.
- 923 54. Stukenbrock EH, Bataillon T, Dutheil JY, Hansen TT, Li R, et al. (2011) The making of a new  
924 pathogen: insights from comparative population genomics of the domesticated wheat  
925 pathogen *Mycosphaerella graminicola* and its wild sister species. *Genome Res* 21: 2157–  
926 2166.
- 927 55. Croll D, Zala M, McDonald BA (2013) Breakage-fusion-bridge Cycles and Large Insertions

- 928           Contribute to the Rapid Evolution of Accessory Chromosomes in a Fungal Pathogen. PLoS  
929           Genet 9. doi:10.1371/journal.pgen.1003567.
- 930   56.   Plissonneau C, Stürchler A, Croll D (2016) The evolution of orphan regions in genomes of a  
931           fungal pathogen of wheat. MBio 7. doi:10.1128/mBio.01231-16.
- 932   57.   Grandaubert J, Dutheil JY, Stukenbrock EH (2017) The genomic rate of adaptation in the  
933           fungal wheat pathogen *Zymoseptoria tritici*. bioRxiv: 1–33.
- 934   58.   Mehrabi R, Taga M, Kema GHJ (2007) Electrophoretic and cytological karyotyping of the  
935           foliar wheat pathogen *Mycosphaerella graminicola* reveals many chromosomes with a  
936           large size range. Mycologia 99: 868–876.
- 937   59.   Grandaubert J, Bhattacharyya A, Stukenbrock EH (2015) RNA-seq Based Gene Annotation  
938           and Comparative Genomics of Four Fungal Grass Pathogens in the Genus *Zymoseptoria*  
939           Identify Novel Orphan Genes and Species-Specific Invasions of Transposable Elements. G3  
940           (Bethesda) 5: g3.115.017731-.
- 941   60.   Keon J, Antoniw J, Carzaniga R, Deller S, Ward JL, et al. (2007) Transcriptional adaptation  
942           of *Mycosphaerella graminicola* to programmed cell death (PCD) of its susceptible wheat  
943           host. Mol Plant Microbe Interact 20: 178–193.
- 944   61.   Brunner PC, Torriani SFF, Croll D, Stukenbrock EH, McDonald B a (2013) Coevolution and  
945           life cycle specialization of plant cell wall degrading enzymes in a hemibiotrophic pathogen.  
946           Mol Biol Evol 30: 1337–1347.
- 947   62.   Yang F, Li W, Jørgensen HJL (2013) Transcriptional Reprogramming of Wheat and the  
948           Hemibiotrophic Pathogen *Septoria tritici* during Two Phases of the Compatible Interaction.  
949           PLoS One 8: e81606.
- 950   63.   Rudd JJ, Kanyuka K, Hassani-Pak K, Derbyshire M, Andongabo A, et al. (2015)  
951           Transcriptome and Metabolite Profiling of the Infection Cycle of *Zymoseptoria tritici* on  
952           Wheat Reveals a Biphasic Interaction with Plant Immunity Involving Differential Pathogen  
953           Chromosomal Contributions and a Variation on the Hemibiotrophic Lifestyle Def. Plant  
954           Physiol 167: 1158–1185.
- 955   64.   Palma-Guerrero J, Torriani SFF, Zala M, Carter D, Courbot M, et al. (2016) Comparative  
956           transcriptomic analyses of *Zymoseptoria tritici* strains show complex lifestyle transitions  
957           and intraspecific variability in transcription profiles. Mol Plant Pathol 17: 845–859.
- 958   65.   Palma-Guerrero J, Ma X, Torriani SFF, Zala M, Francisco CS, et al. (2017) Comparative  
959           Transcriptome Analyses in *Zymoseptoria tritici* Reveal Significant Differences in Gene

- 960 Expression Among Strains During Plant Infection. *Mol Plant-Microbe Interact* 30: 231–244.
- 961 66. Liu H, Zhang B, Li C, Bao X (2010) Knock down of chitosanase expression in  
962 phytopathogenic fungus *Fusarium solani* and its effect on pathogenicity. *Curr Genet* 56:  
963 275–281. doi:10.1007/s00294-010-0299-x.
- 964 67. Haslbeck M, Vierling E (2015) A first line of stress defense: Small heat shock proteins and  
965 their function in protein homeostasis. *J Mol Biol* 427: 1537–1548.
- 966 68. Laugé R (1997) The in planta-produced extracellular proteins ECP1 and ECP2 of  
967 *Cladosporium fulvum* are virulence factors. *Mol Plant Microbe Interact* 10: 725–734.  
968 doi:10.1094/MPMI.1997.10.6.725.
- 969 69. Yun CW, Tiedeman JS, Moore RE, Philpott CC (2000) Siderophore-iron uptake in  
970 *Saccharomyces cerevisiae*: Identification of ferrichrome and fusarinine transporters. *J Biol*  
971 *Chem* 275: 16354–16359. doi:10.1074/jbc.M001456200.
- 972 70. Haas H, Eisendle M, Turgeon BG (2008) Siderophores in Fungal Physiology and Virulence.  
973 *Annu Rev Phytopathol* 46: 149–187.
- 974 71. Kubicek CP, Starr TL, Glass NL (2014) Plant Cell Wall-Degrading Enzymes and Their  
975 Secretion in Plant-Pathogenic Fungi. *Annu Rev Phytopathol*: 1–25.
- 976 72. Ohtaki S, Maeda H, Takahashi T, Hasegawa F, Gomi K, et al. (2006) Novel Hydrophobic  
977 Surface Binding Protein , HsbA , Produced by *Aspergillus oryzae* Novel Hydrophobic  
978 Surface Binding Protein , HsbA , Produced by *Aspergillus oryzae*. *Appl Environ Microbiol*  
979 72: 2407–2413.
- 980 73. Lo Presti L, Lanver D, Schweizer G, Tanaka S, Liang L, et al. (2015) Fungal Effectors and  
981 Plant Susceptibility. *Annu Rev Plant Biol* 66: 513–545.
- 982 74. Motteram J, Küfner I, Deller S, Brunner F, Hammond-Kosack KE, et al. (2009) Molecular  
983 Characterization and Functional Analysis of *MgNLP* , the Sole NPP1 Domain-Containing  
984 Protein, from the Fungal Wheat Leaf Pathogen *Mycosphaerella graminicola*. *Mol Plant-*  
985 *Microbe Interact* 22: 790–799.
- 986 75. Kettles GJ, Bayon C, Canning G, Rudd JJ, Kanyuka K (2017) Apoplastic recognition of  
987 multiple candidate effectors from the wheat pathogen *Zymoseptoria tritici* in the nonhost  
988 plant *Nicotiana benthamiana*. *New Phytol* 213: 338–350. doi:10.1111/nph.14215.
- 989 76. Wösten H a (2001) Hydrophobins: multipurpose proteins. *Annu Rev Microbiol* 55: 625–  
990 646. doi:10.1146/annurev.micro.55.1.625.
- 991 77. Aimanianda V, Bayry J, Bozza S, Knemeyer O, Perruccio K, et al. (2009) Surface

- 992 hydrophobin prevents immune recognition of airborne fungal spores. *Nature* 460: 1117–  
993 1121.
- 994 78. Takai S (1974) Pathogenicity and cerato-ulmin production in *Ceratocystis ulmi*. *Nature*  
995 252: 124–126.
- 996 79. Vu K, Tham R, Uhrig JP, Thompson GR, Pombejra SN, et al. (2014) Invasion of the central  
997 nervous system by *Cryptococcus neoformans* requires a secreted fungal metalloprotease.  
998 *MBio* 5: 1–13. doi:10.1128/mBio.01101-14.
- 999 80. O’Connell RJ, Thon MR, Hacquard S, Amyotte SG, Kleemann J, et al. (2012) Lifestyle  
1000 transitions in plant pathogenic *Colletotrichum* fungi deciphered by genome and  
1001 transcriptome analyses. *Nat Genet* 44: 1060–1065.
- 1002 81. Naumann TA, Wicklow DT, Price NPJ (2011) Identification of a chitinase-modifying protein  
1003 from *Fusarium verticillioides*: Truncation of a host resistance protein by a fungalysin  
1004 metalloprotease. *J Biol Chem* 286: 35358–35366. doi:10.1074/jbc.M111.279646.
- 1005 82. Karimi Jashni M, Dols IHM, Iida Y, Boeren S, Beenen HG, et al. (2015) Synergistic action of  
1006 serine- and metallo-proteases from *Fusarium oxysporum* f. sp. *lycopersici* cleaves chitin-  
1007 binding tomato chitinases, reduces their antifungal activity and enhances fungal virulence.  
1008 *Mol Plant-Microbe Interact* 28: 150427105219007.
- 1009 83. Kettles G, Bayon C, Sparks CA, Canning G, Kanyuka K, et al. (2017) Characterisation of an  
1010 antimicrobial and phytotoxic ribonuclease secreted by the fungal wheat pathogen  
1011 *Zymoseptoria tritici*. *New Phytol* 44: 1–25. doi:10.1101/130393.
- 1012 84. Pazzagli L, Cappugi G, Manao G, Camici G, Santini A, et al. (1999) Purification,  
1013 characterization, and amino acid sequence of cerato- platanin, a new phytotoxic protein  
1014 from *Ceratocystis fimbriata* f. sp. *platani*. *J Biol Chem* 274: 24959–24964.
- 1015 85. Schotanus K, Soyer JL, Connolly LR, Grandaubert J, Happel P, et al. (2015) Histone  
1016 modifications rather than the novel regional centromeres of *Zymoseptoria tritici*  
1017 distinguish core and accessory chromosomes. *Epigenetics Chromatin* 8: 41.
- 1018 86. Connolly LR, Smith KM, Freitag M (2013) The *Fusarium graminearum* Histone H3 K27  
1019 Methyltransferase KMT6 Regulates Development and Expression of Secondary Metabolite  
1020 Gene Clusters. *PLoS Genet* 9. doi:10.1371/journal.pgen.1003916.
- 1021 87. Soyer JL, El Ghalid M, Glaser N, Ollivier B, Linglin J, et al. (2014) Epigenetic Control of  
1022 Effector Gene Expression in the Plant Pathogenic Fungus *Leptosphaeria maculans*. *PLoS*  
1023 *Genet* 10: e1004227. Available: <http://dx.plos.org/10.1371/journal.pgen.1004227>.



- 1024 88. Poppe S, Dorsheimer L, Happel P, Stukenbrock EH (2015) Rapidly Evolving Genes Are Key  
1025 Players in Host Specialization and Virulence of the Fungal Wheat Pathogen *Zymoseptoria*  
1026 *tritici* (*Mycosphaerella graminicola*). *PLoS Pathog* 11: e1005055.
- 1027 89. Thordal-Christensen H, Zhang Z, Wei Y, Collinge DB (1997) Subcellular localization of H2O2  
1028 in plants. H2O2 accumulation in papillae and hypersensitive response during the barley-  
1029 powdery mildew interaction. *Plant J* 11: 1187–1194. doi:10.1046/j.1365-  
1030 313X.1997.11061187.x.
- 1031 90. Bolger AM, Lohse M, Usadel B (2014) Trimmomatic: A flexible trimmer for Illumina  
1032 sequence data. *Bioinformatics* 30: 2114–2120. doi:10.1093/bioinformatics/btu170.
- 1033 91. Kim D, Pertea G, Trapnell C, Pimentel H, Kelley R, et al. (2013) TopHat2: accurate alignment  
1034 of transcriptomes in the presence of insertions, deletions and gene fusions. *Genome Biol*  
1035 14: R36.
- 1036 92. Li H, Handsaker B, Wysoker A, Fennell T, Ruan J, et al. (2009) The Sequence Alignment/Map  
1037 format and SAMtools. *Bioinformatics* 25: 2078–2079. doi:10.1093/bioinformatics/btp352.
- 1038 93. Trapnell C, Hendrickson DG, Sauvageau M, Goff L, Rinn JL, et al. (2013) Differential analysis  
1039 of gene regulation at transcript resolution with RNA-seq. *Nat Biotechnol* 31: 46–53.
- 1040 94. Anders S, Pyl PT, Huber W (2015) HTSeq—a Python framework to work with high-  
1041 throughput sequencing data. *Bioinformatics* 31: 166–169.
- 1042 95. Love MI, Huber W, Anders S (2014) Moderated estimation of fold change and dispersion  
1043 for RNA-seq data with DESeq2. *Genome Biol* 15: 550.
- 1044 96. Alexa A, Rahnenführer J, Lengauer T (2006) Improved scoring of functional groups from  
1045 gene expression data by decorrelating GO graph structure. *Bioinformatics* 22: 1600–1607.  
1046 doi:10.1093/bioinformatics/btl140.
- 1047 97. Quinlan AR, Hall IM (2010) BEDTools: A flexible suite of utilities for comparing genomic  
1048 features. *Bioinformatics* 26: 841–842. doi:10.1093/bioinformatics/btq033.
- 1049 98. Stukenbrock EH, Jørgensen FG, Zala M, Hansen TT, McDonald BA, et al. (2010) Whole-  
1050 genome and chromosome evolution associated with host adaptation and speciation of the  
1051 wheat pathogen *Mycosphaerella graminicola*. *PLoS Genet* 6: e1001189.
- 1052 99. Allen GC, Flores-Vergara M a, Krasynanski S, Kumar S, Thompson WF (2006) A modified  
1053 protocol for rapid DNA isolation from plant tissues using cetyltrimethylammonium  
1054 bromide. *Nat Protoc* 1: 2320–2325. doi:10.1038/nprot.2006.384.
- 1055 100. Chin C-S, Alexander DH, Marks P, Klammer AA, Drake J, et al. (2013) Nonhybrid, finished

1056 microbial genome assemblies from long-read SMRT sequencing data. *Nat Methods* 10:  
1057 563–569.

1058 101. Soderlund C, Bomhoff M, Nelson WM (2011) SyMAP v3.4: A turnkey synteny system with  
1059 application to plant genomes. *Nucleic Acids Res* 39. doi:10.1093/nar/gkr123.

1060 102. Angiuoli S V., Salzberg SL (2011) Mugsy: Fast multiple alignment of closely related whole  
1061 genomes. *Bioinformatics* 27: 334–342. doi:10.1093/bioinformatics/btq665.

1062

1063 **Tables**

1064

1065 **Table 1. The three *Z. tritici* isolates vary in tolerance to abiotic stressors.**

1066 **Table 2. Summary of the stage-specific transcriptomes (A-D) of the three *Z. tritici* isolates**

1067 **Table 3. *Z. tritici* core biotrophic effector candidate genes**

1068 **Table 4. *Z. tritici* core necrotrophic effector candidate genes**

1069 **Table 5. Genes with isolate-specific expression profiles during wheat infection**

1070 **Figures**

1071

1072

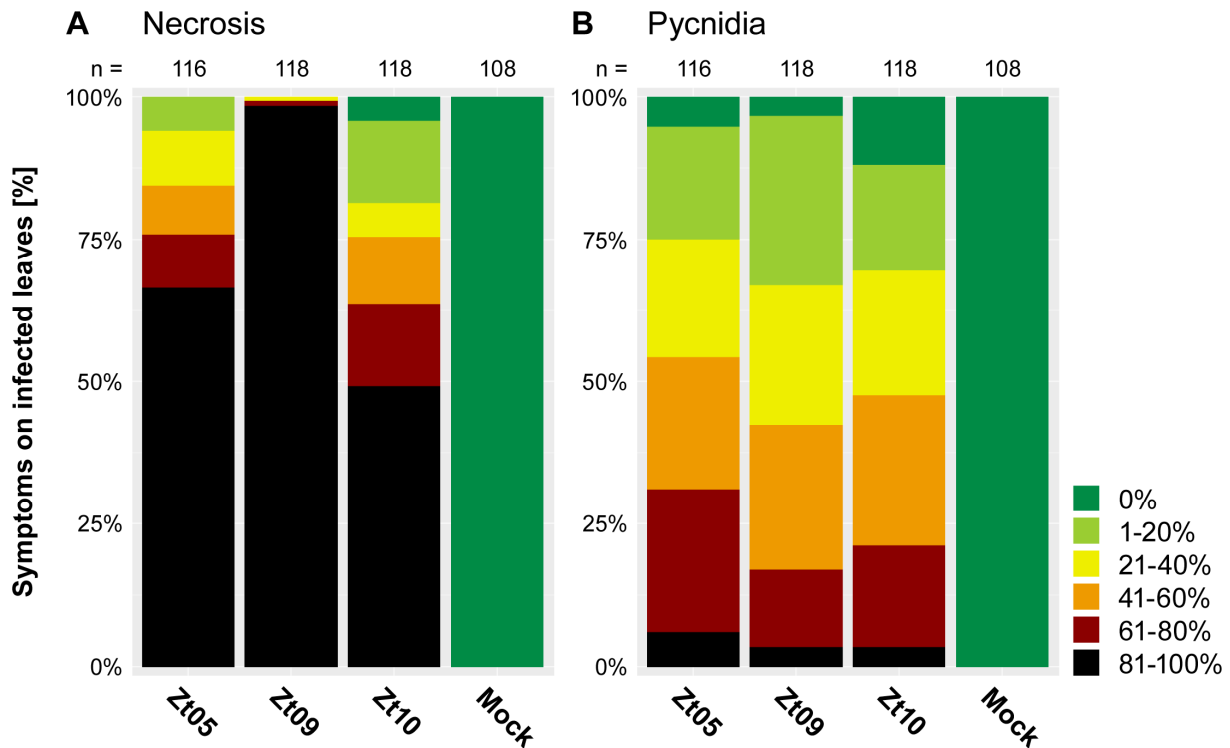

1073

1074

1075 **Figure 1. *In-planta* phenotypic assay demonstrates similar pycnidia levels of *Z. tritici***  
1076 **isolates on the susceptible wheat cultivar Obelisk.**

1077 Quantitative differences in **(A)** necrosis and **(B)** pycnidia coverage of inoculated leaf areas were  
1078 manually assessed at 28 days post inoculation based on six categories: 0 (without visible  
1079 symptoms), 1 (1% to 20%), 2 (21% to 40%), 3 (41% to 60%), 4 (61% to 80%), and 5 (81% to  
1080 100%). The three isolates caused different levels of necrosis (two-sided Mann-Whitney *U* tests,  
1081  $P \leq 0.0048$ ) but pycnidia levels were not different (two-sided Mann-Whitney *U* tests,  $P \geq 0.034$ ).

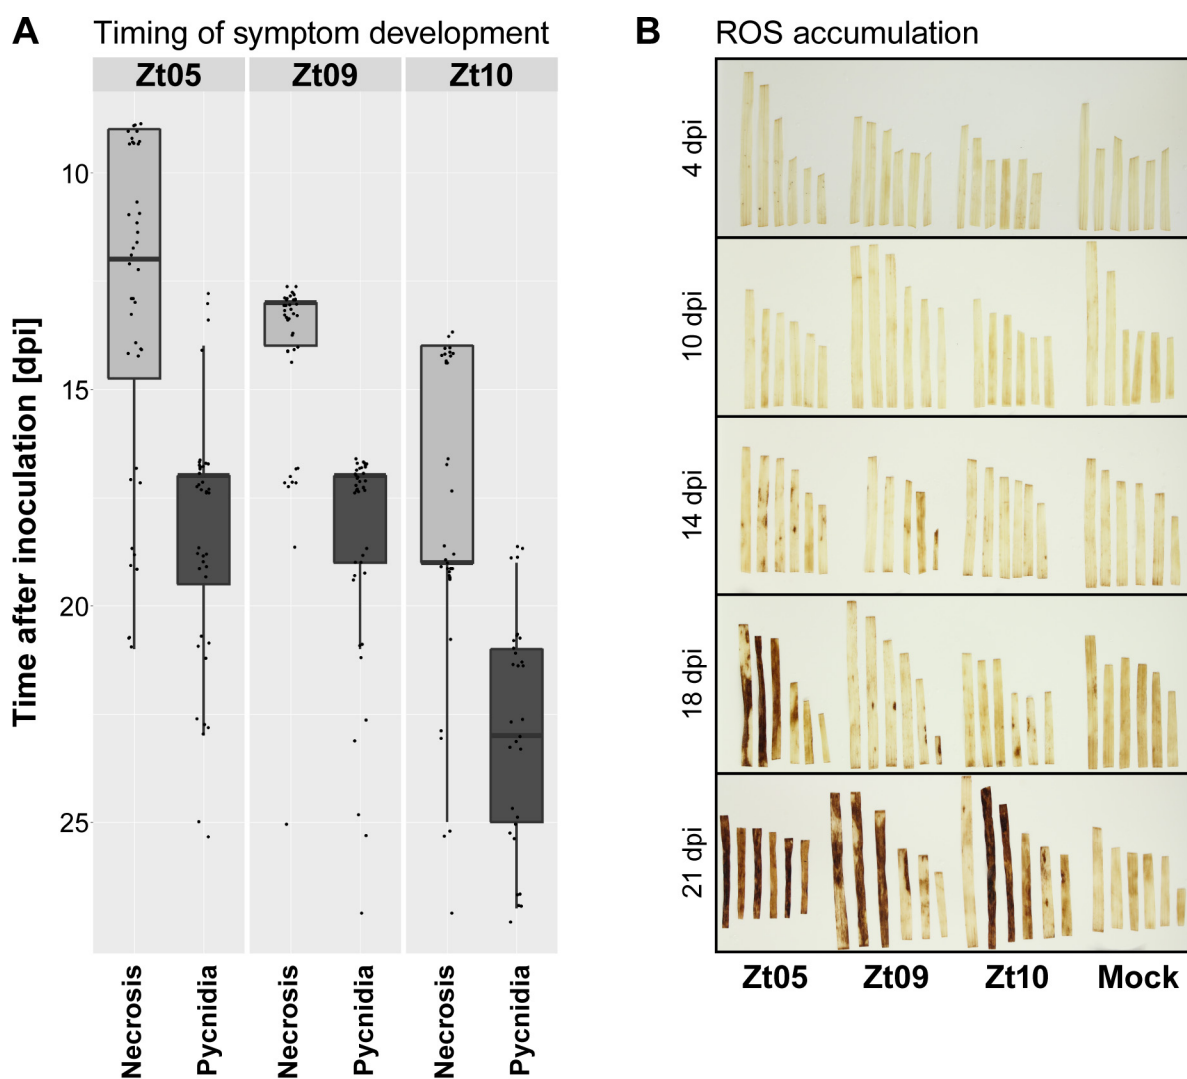

1082  
1083 **Figure 2. Timing of disease symptom development and H<sub>2</sub>O<sub>2</sub> accumulation varies between**  
1084 **wheat leaves infected with different *Z. tritici* isolates.**

1085 **(A)** Temporal disease progression for infections with Zt05, Zt09, and Zt10 was measured by daily  
1086 manual screening for the first occurrence of necrotic spots and pycnidia. For each isolate, 40  
1087 leaves of the wheat cultivar Obelisk were inoculated and tested. No disease developed on seven  
1088 of the leaves inoculated with Zt10. **(B)** Infected leaves were stained for accumulation of the  
1089 reactive oxygen species H<sub>2</sub>O<sub>2</sub> at 4, 10, 14, 18, and 21 dpi by 3,3'-diaminobenzidine. Dark red-  
1090 brown precipitate indicates H<sub>2</sub>O<sub>2</sub> accumulation and appeared first in leaves infected with Zt05 in  
1091 leaf areas beginning to undergo necrosis.

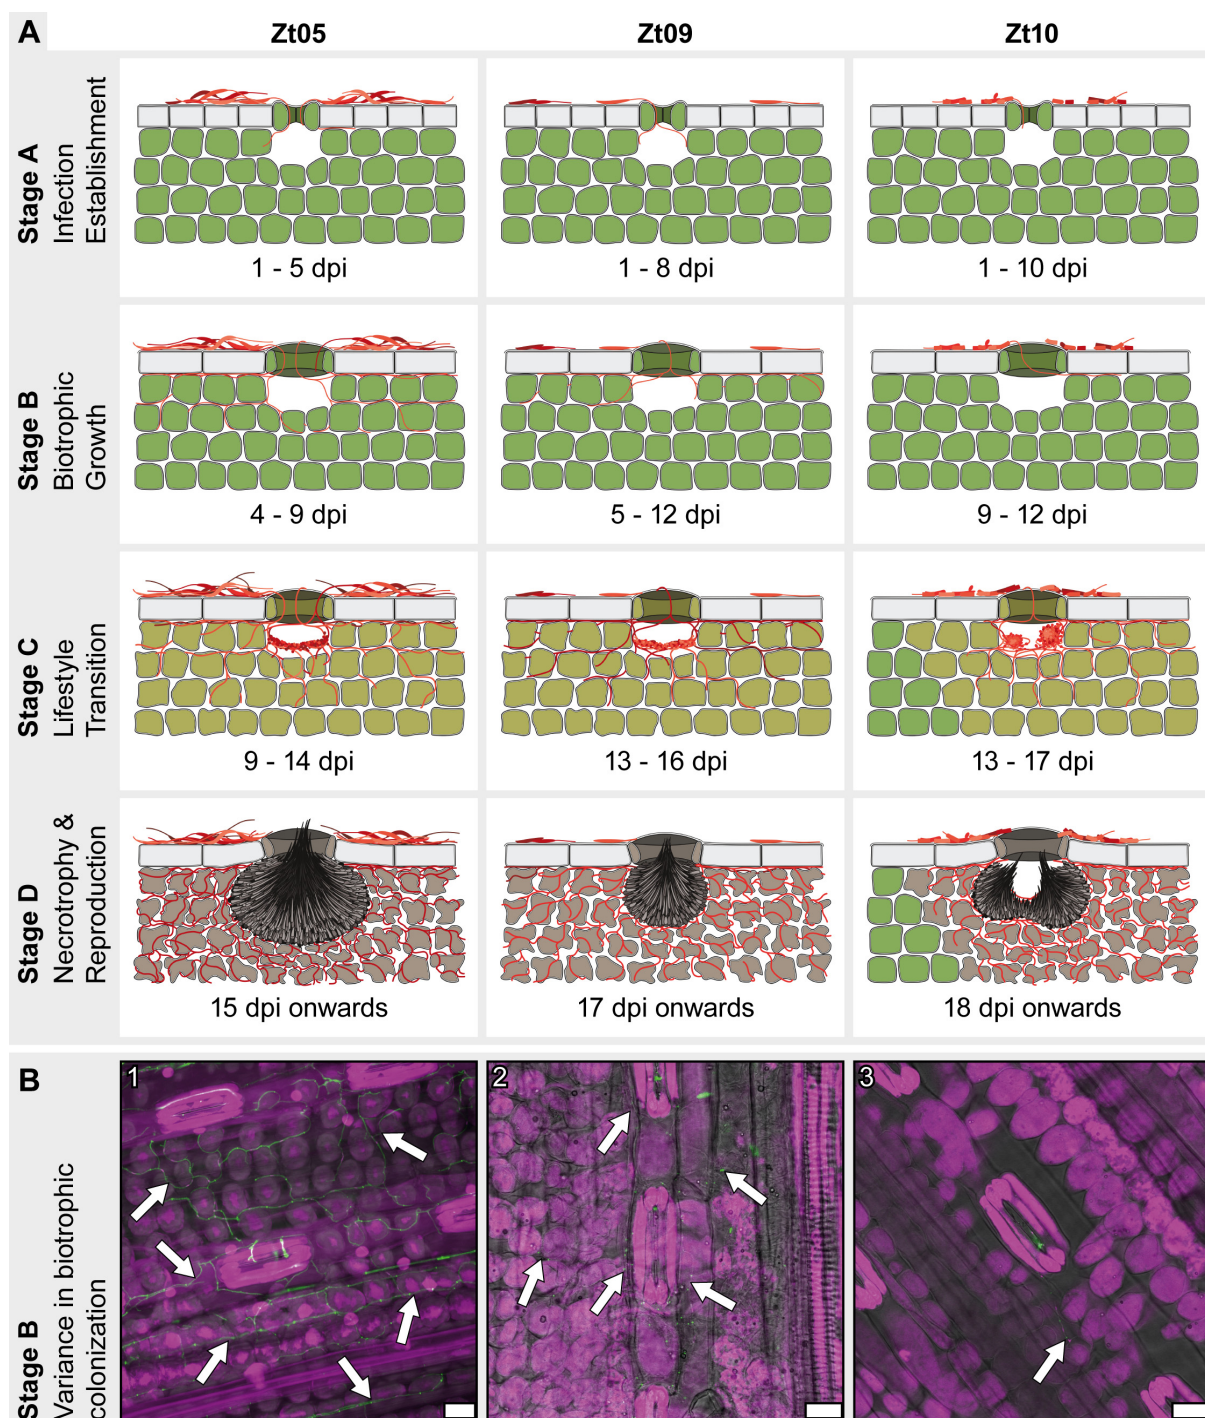

1092

1093 **Figure 3. *Z. tritici* wheat infections are characterized by four distinct infection stages and**  
 1094 **isolate-specific infection development.**

1095 **(A)** Schematic drawings of the key features that characterize the four infection stages of *Z. tritici*  
 1096 and illustrate the infection phenotypes of isolates Zt05, Zt09, and Zt10 on the wheat cultivar  
 1097 Obelisk. **(B)** Micrographs showing *Z. tritici* hyphae (arrows) during biotrophic growth inside  
 1098 wheat leaves. Maximum projections of confocal image z-stacks. Nuclei and wheat cells are  
 1099 displayed in purple and fungal hyphae or septae in green. The panel shows biotrophic colonization  
 1100 of **(1)** isolate Zt05 at 7 dpi, **(2)** Zt09 at 11 dpi, and **(3)** Zt10 at 9 dpi. Scale bars = 25  $\mu$ m.

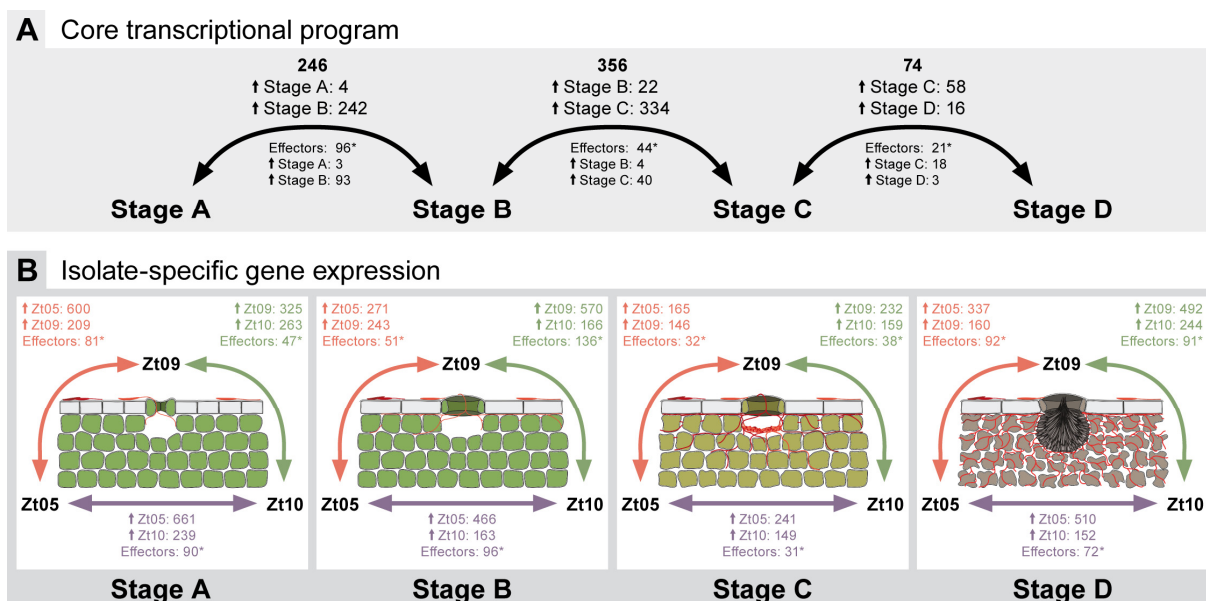

1101

1102

1103 **Figure 4. *Z. tritici* core transcriptional program during wheat infection and isolate-specific**  
 1104 **expression during the four infection stages.**

1105 Numbers of significantly differentially expressed genes across all isolates **(A)** between the four  
 1106 core *Z. tritici* infection stages and **(B)** between the isolates within the infection stages (between  
 1107 Zt05 and Zt09: orange arrows, between Zt05 and Zt10: purple arrows, between Zt09 and Zt10:  
 1108 green arrows). Small arrows (↑) with stage or isolate names indicate the number of genes  
 1109 specifically up-regulated during that stage or in that isolate for the respective comparison.  
 1110 Differential gene expression analyses performed with DESeq2. Genes were considered to be  
 1111 significantly differentially expressed if  $P_{adj} \leq 0.01$  and  $|\log_2 \text{fold change}| \geq 2$ . \*Indicates significant  
 1112 enrichment of effector candidates among differentially expressed genes (Fischer's exact tests,  
 1113  $P < 0.001$ ). Effector candidates encode secreted proteins putatively involved in modulating  
 1114 molecular host-pathogen interactions [73].

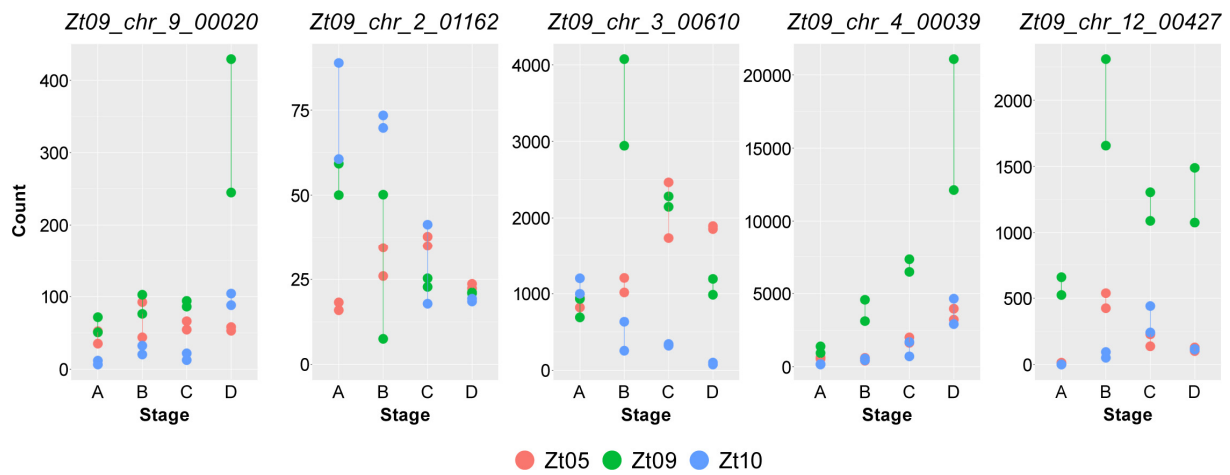

1115

1116

1117 **Figure 5. Five effector candidates with highly different expression profiles during wheat**  
1118 **infection in the three isolates.**

1119 The plots display normalized read counts for five effector candidate genes calculated by DESeq2  
1120 [95] for the twelve RNA-seq datasets. Read counts were normalized across the four core infection  
1121 stages (A to D) and the three *Z. tritici* isolates Zt05, Zt09, and Zt10 and represent a measure of  
1122 relative gene expression between the infection stages and between the isolates.



## 1123 **Supporting Information**

1124

1125 **S1 Table. *Zymoseptoria tritici* isolates used in this study.**

1126

1127 **S2 Table. SMRT Sequencing-based *de novo* genome assemblies, synteny analyses, and**  
1128 **conserved genes.**

1129 The table summarizes basic statistics of *de novo* genome assemblies generated for isolates Zt05  
1130 and Zt10 based on SMRT Sequencing long-read data, results of synteny analyses between  
1131 IPO323/Zt09 chromosomes and Zt05 and Zt10 unitigs, and the presence/absence of IPO323/Zt09  
1132 genes and effector candidates in the genomes of Zt05 and Zt10.

1133

1134 **S3 Table. *Z. tritici* core genes and effector candidates.**

1135 List of 10,426 genes and 370 effector candidate genes that are present in the genomes of the  
1136 *Z. tritici* isolates Zt05, Zt09, and Zt10 based on nBLAST analyses. Genes are based on the *Z. tritici*  
1137 genome annotation [59] and effector gene candidates were predicted by [6].

1138

1139 **S4 Table. Isolate-specific sampling schedules for transcriptome sequencing of infection**  
1140 **stages.**

1141 Post-inoculation time points were scheduled based on previous plant infection experiments to  
1142 cover each of the four *Z. tritici* infection stages. Samples for transcriptome sequencing and  
1143 analyses were collected at one to three different times points and eventually selected based on  
1144 the results of microscopic analyses of central leaf sections. Selected samples are marked by \*.

1145 **S5 Table. Detailed overview of stage-specific transcriptomes of *Z. tritici* isolates during**  
1146 **wheat infection generated in this study.**

1147

1148 **S6 Table. Comparison of expression on core and accessory chromosomes of *Z. tritici* during**  
1149 **wheat infection.**

1150 FPKM expression values calculated with Cuffdiff2 [93] for genes and 1-kb windows located on the  
1151 core (CC) and accessory (AC) chromosomes.

1152

1153 **S7 Table. Genes that are significantly differentially expressed between infection stage A**  
1154 **and B across all *Z. tritici* isolates.**

1155

1156 **S8 Table. Genes that are significantly differentially expressed between infection stage B**  
1157 **and C across all *Z. tritici* isolates.**

1158

1159 **S9 Table. Genes that are significantly differentially expressed between infection stage C**  
1160 **and D across all *Z. tritici* isolates.**

1161

1162 **S10 Table. *Z. tritici* biotrophic core effector candidates.**

1163

1164 **S11 Table. *Z. tritici* necrotrophic core effector candidates.**

1165

1166 **S12 Table. Core *Z. tritici* genes that are differentially expressed between the three isolates**  
1167 **during wheat infection.**

1168

1169 **S13 Table. Core *Z. tritici* genes that are differentially expressed between the three isolates**  
1170 **during wheat infection, sorted by up-regulation per isolate.**

1171

1172 **S14 Table. *Z. tritici* effector candidate genes that are differentially expressed between the**  
1173 **three isolates during wheat infection.**

1174

1175 **S15 Table. Gene annotation for the *Z. tritici* isolate Zt05.**

1176 Gene annotation in .gff file format for the Zt05 genome assembly based on Illumina short reads  
1177 (NCBI BioSample: SAMN04494882).

1178

1179 **S16 Table. Gene annotation for the *Z. tritici* isolate Zt10.**

1180 Gene annotation in .gff file format for the Zt10 genome assembly based on Illumina short reads  
1181 (NCBI accession number: GCA\_000223645.2).

1182

1183 **S17 Table. Transposable element annotation for the *Z. tritici* isolate Zt05.**

1184 Transposable element annotation in .gff file format for the Zt05 genome assembly based on  
1185 Illumina short reads (NCBI BioSample: SAMN04494882).

1186

1187 **S18 Table. Transposable element annotation for the *Z. tritici* isolate Zt10.**

1188 Transposable element annotation in .gff file format for the Zt10 genome assembly based on  
1189 Illumina short reads (NCBI accession number: GCA\_000223645.2).

1190

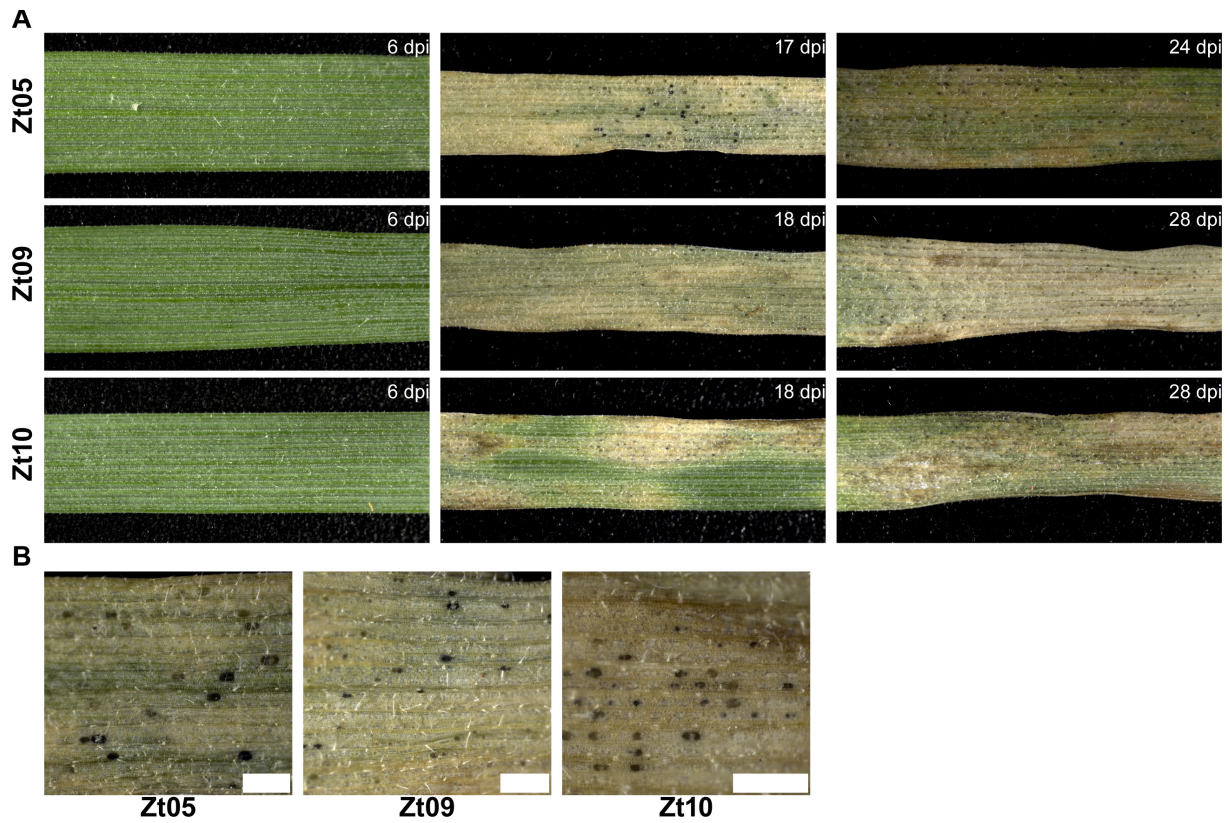

1191

1192

1193 **S1 Figure. Disease development on wheat leaves infected with *Z. tritici* isolates Zt05, Zt09,**  
1194 **and Zt10.**

1195 **(A)** Photographs of wheat leaves taken at different time points after inoculation with *Z. tritici*

1196 isolates Zt05, Zt09, and Zt10. **(B)** Infected wheat leaves contained similar numbers of pycnidia.

1197 Scale bars = 500 µm.

1198

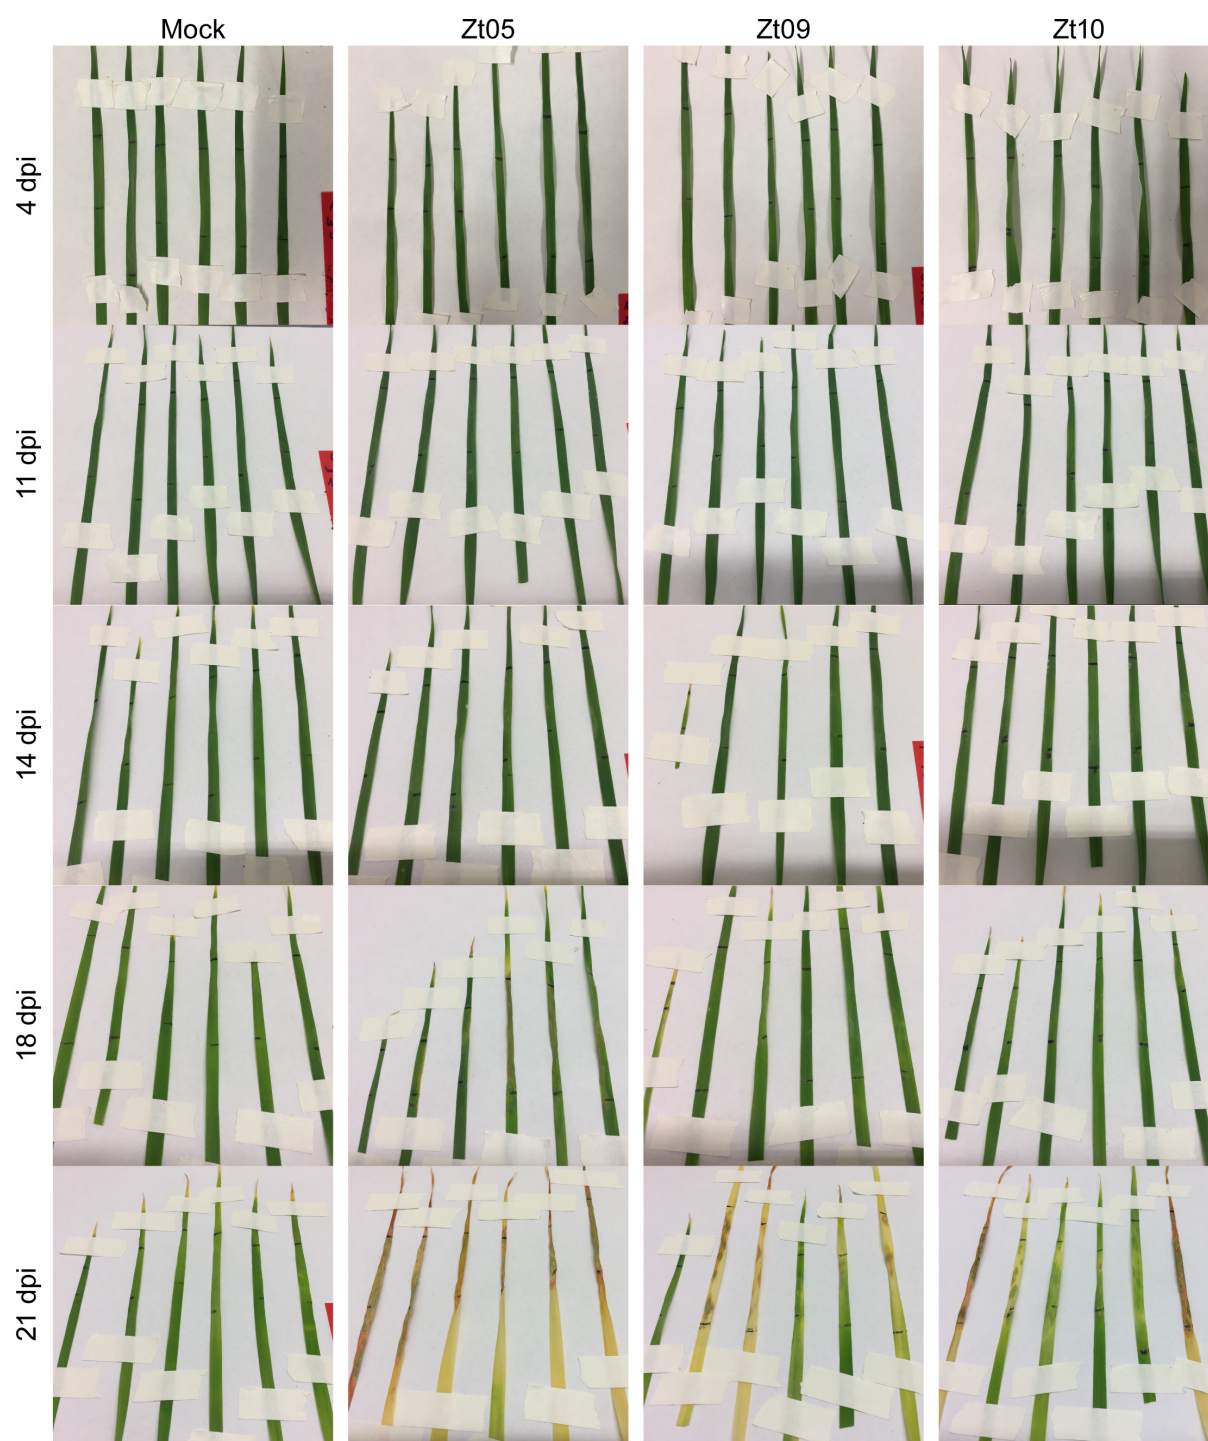

1199

1200

1201 **S2 Figure. Symptom development on wheat leaves used for the ROS staining assay.**

1202 Photographs of *Triticum aestivum* cv. Obelisk leaves taken at 4, 11, 14, 18, and 21 days post  
1203 inoculation with *Z. tritici* isolates Zt05, Zt09, and Zt10 and mock treatment. Leaves were  
1204 subsequently subjected to ROS detection staining.

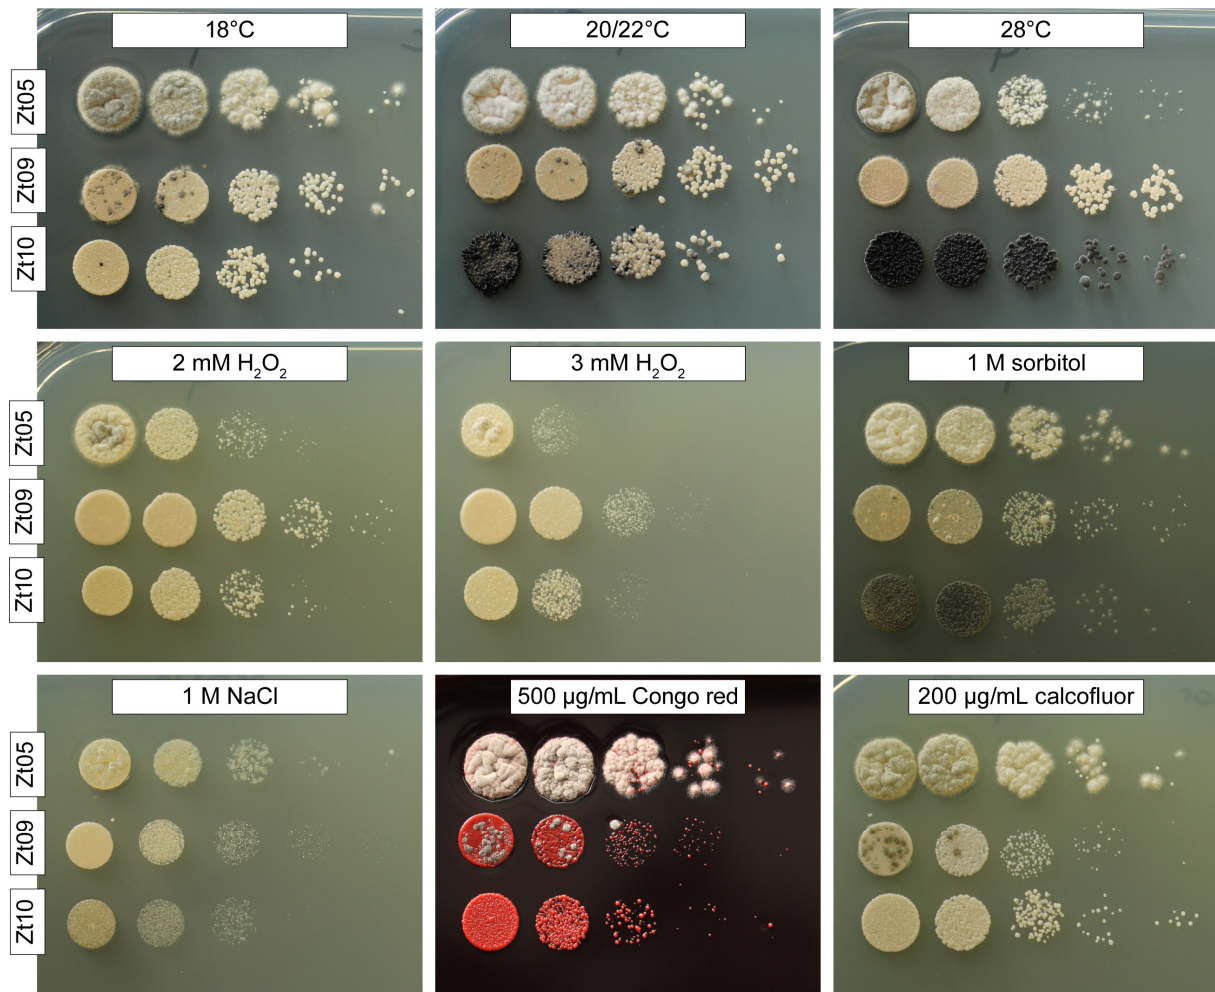

1205

1206

1207 **S3 Figure. Differences in colony morphology and abiotic stress tolerance between *Z. tritici***  
1208 **isolates.**

1209 Growth of the isolates Zt05, Zt09, and Zt10 was tested under multiple stress conditions in  
1210 comparison to the standard cultivation condition *in vitro* (solid YMS medium at 18°C, no light):  
1211 growing conditions of wheat (20/22°C at 16-h day/8-h night rhythm), heat stress (28°C),  
1212 oxidative stress (2 and 3 mM H<sub>2</sub>O<sub>2</sub>), osmotic stress (1 M sorbitol, 1 M NaCl), and cell wall stress  
1213 (500 µg/mL Congo red, 200 µg/mL calcofluor white).

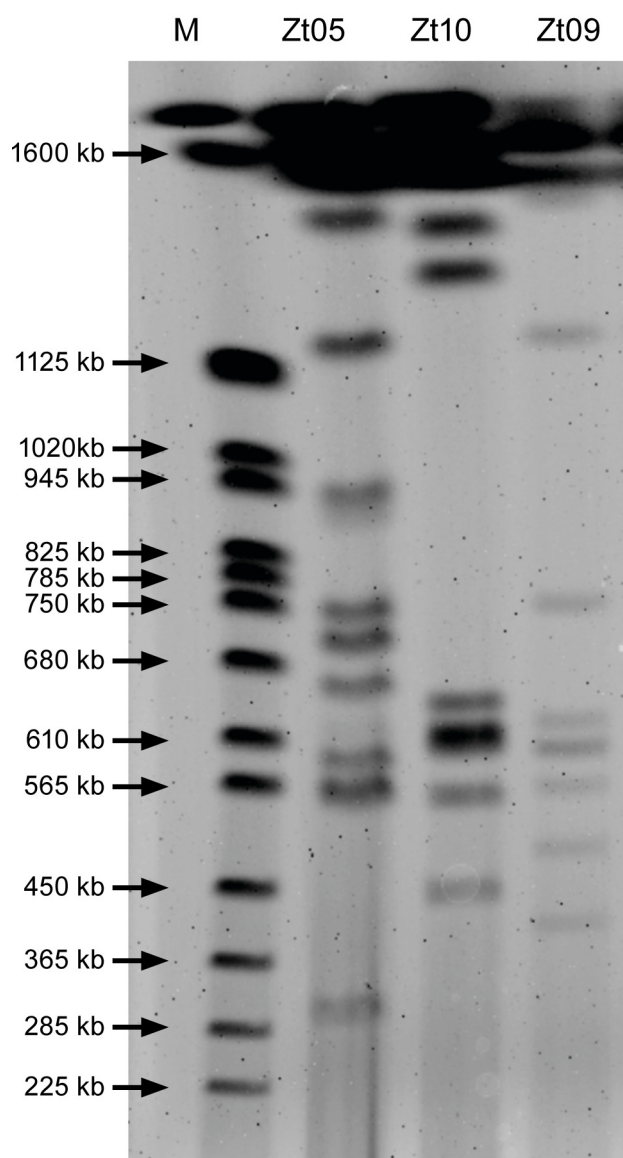

1214

1215

1216 **S4 Figure. Karyotype variation of *Z. tritici* field isolates.**

1217 Pulsed-field gel electrophoresis shows number and size variations for small chromosomes (~225

1218 to 1,460 kb) of *Z. tritici* isolates Zt05, Zt10, and Zt09. Standard chromosome size marker (M):

1219 *Saccharomyces cerevisiae*.

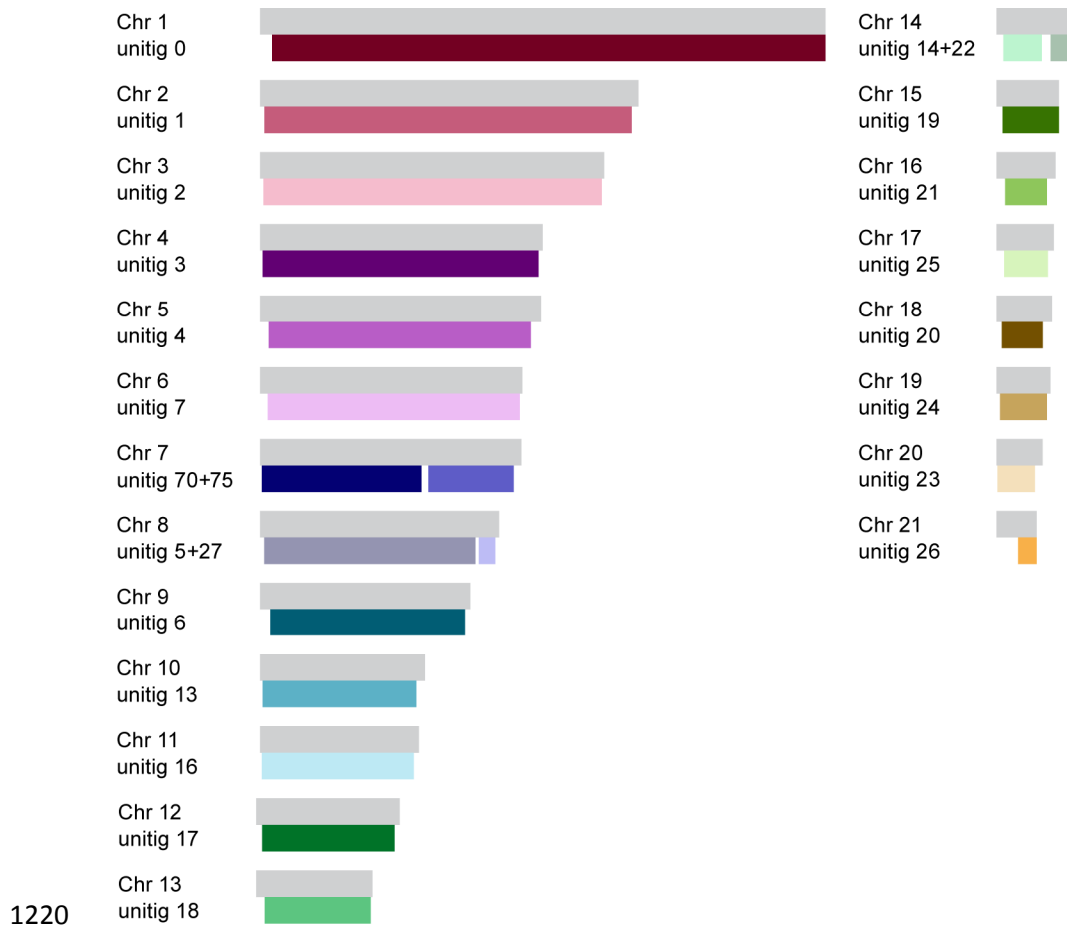

1220

1221

1222 **S5 Figure. Synteny between Zt05 *de novo* assembled unitigs and IPO323 chromosomes.**

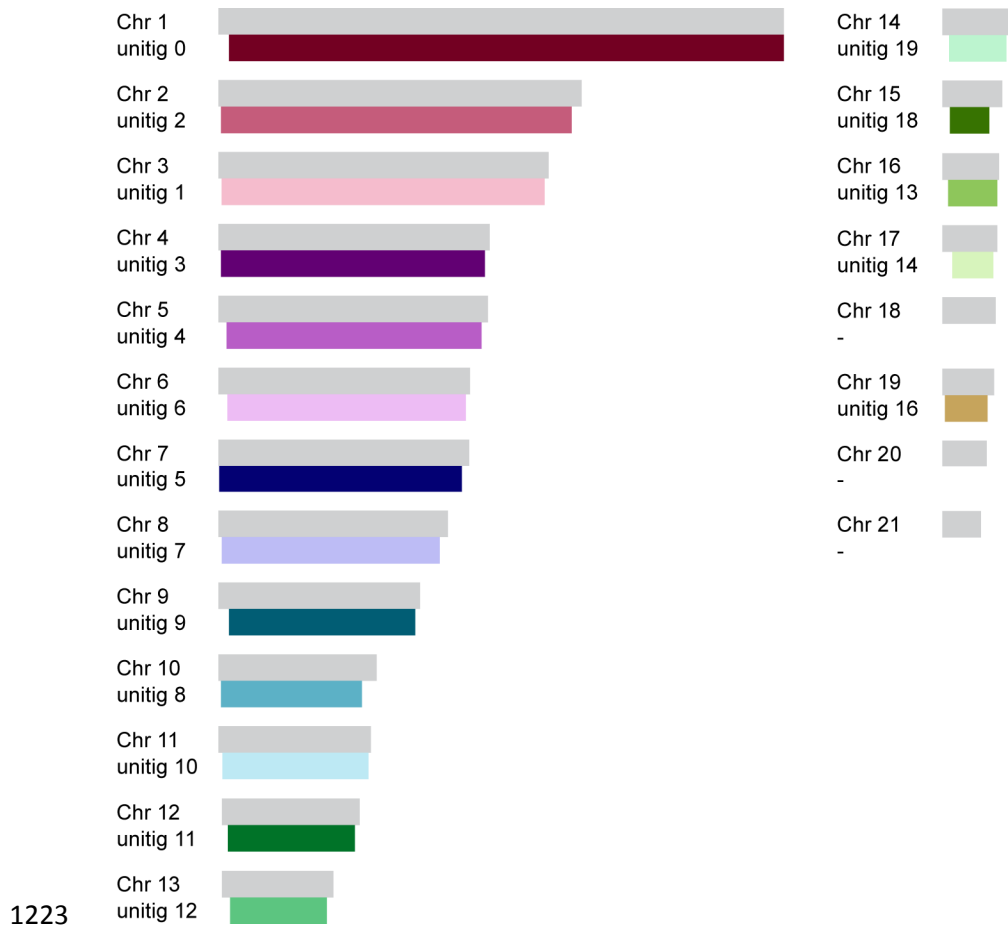

1223

1224

1225

**S6 Figure. Synteny between Zt10 *de novo* assembled unitigs and IPO323 chromosomes.**



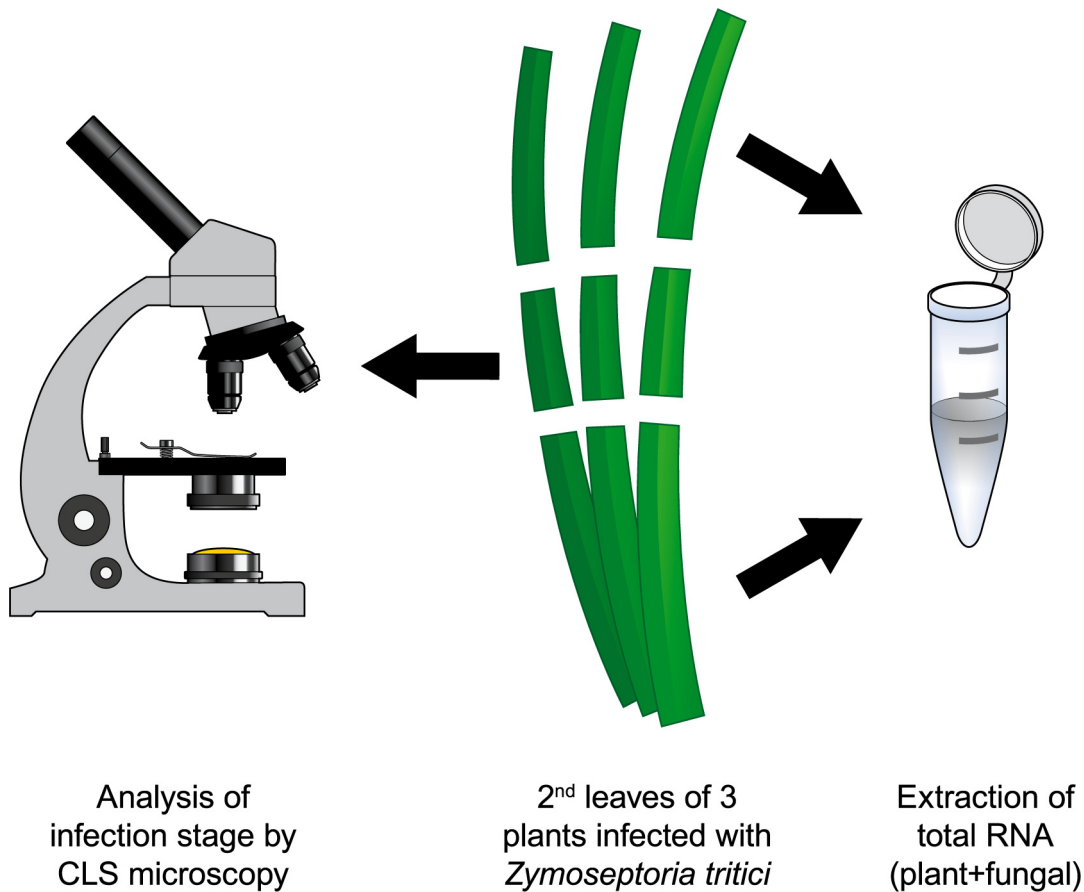

1228 **S7 Figure. Generation of isolate- and stage-specific transcriptomes was enabled by confocal**  
1229 **microscopy analyses.**

1230 The schematic drawing illustrates how we selected samples for RNA-seq. Central sections of  
1231 *Z. tritici*-infected wheat leaves from three independent plants (second leaf of each plant) were  
1232 stained and analyzed by confocal laser-scanning microscopy while the remaining infected leaf  
1233 material was pooled and ground in liquid nitrogen for total RNA extraction. RNA samples  
1234 subjected to sequencing were chosen based on the morphological infection stage that we observed  
1235 in the central leaf section by microscopy.

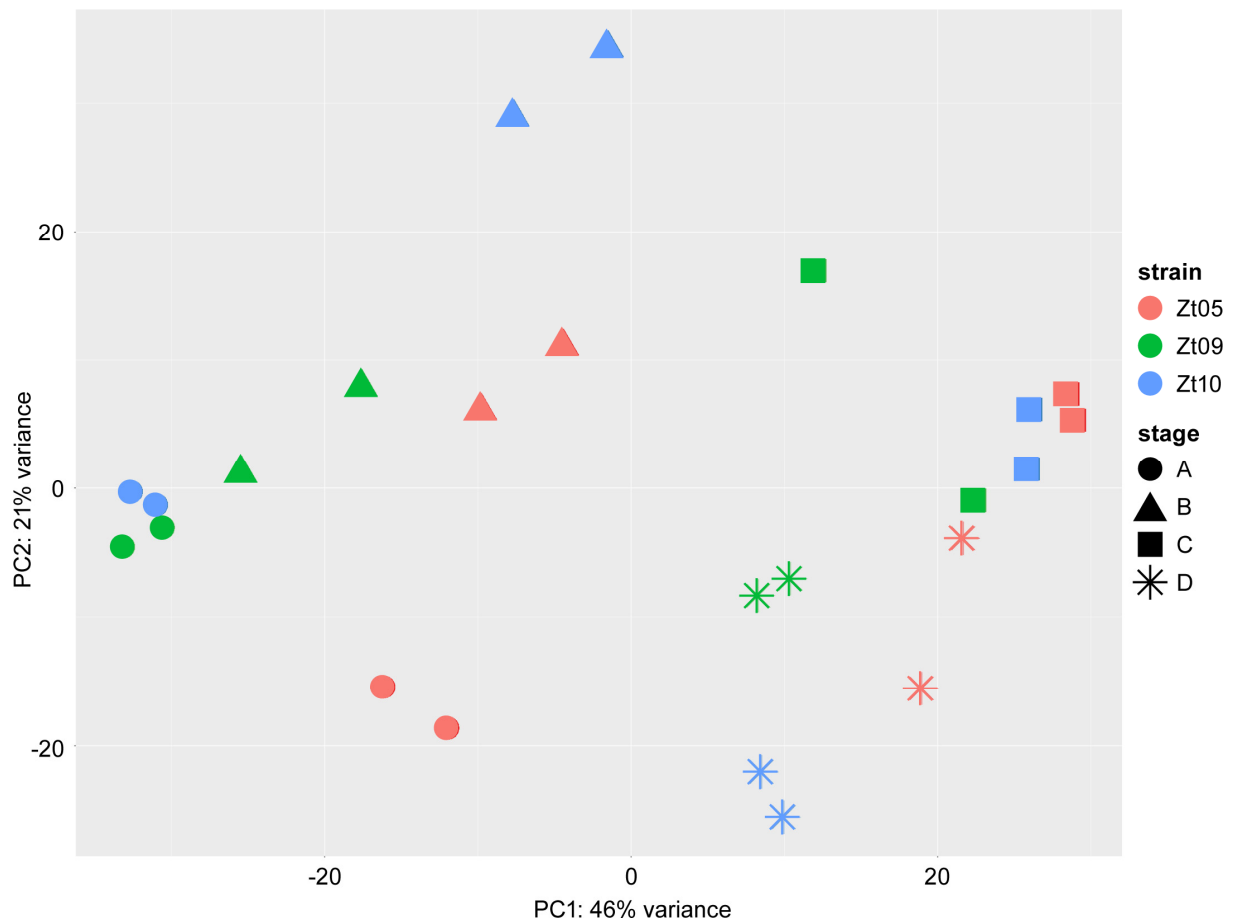

1236

1237

1238 **S8 Figure. RNA-seq data principal component analysis plot based on rlog-transformed read**  
1239 **counts for *Z. tritici* core genes.**

1240 PC1 separates datasets from infections stages A and B from stages C and D. Stage-specific datasets

1241 from all isolates cluster together.

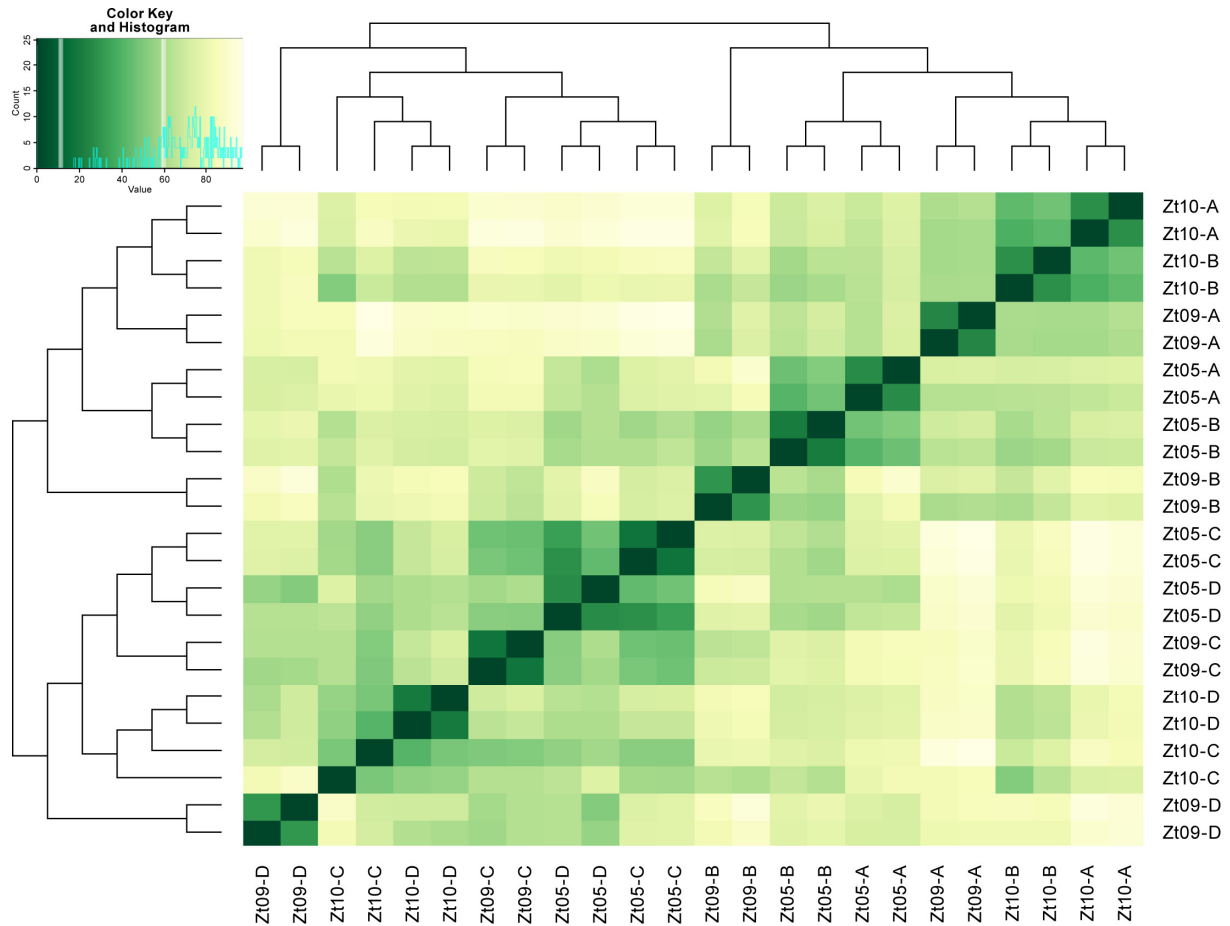

1242

1243

1244 **S9 Figure. Transcriptome data distance matrix based on rlog-transformed read counts for**  
1245 ***Z. tritici* core genes.**

1246 Datasets from stages A and B representing biotrophic growth form one cluster as do datasets of  
1247 stages C and D representing necrotrophic growth.

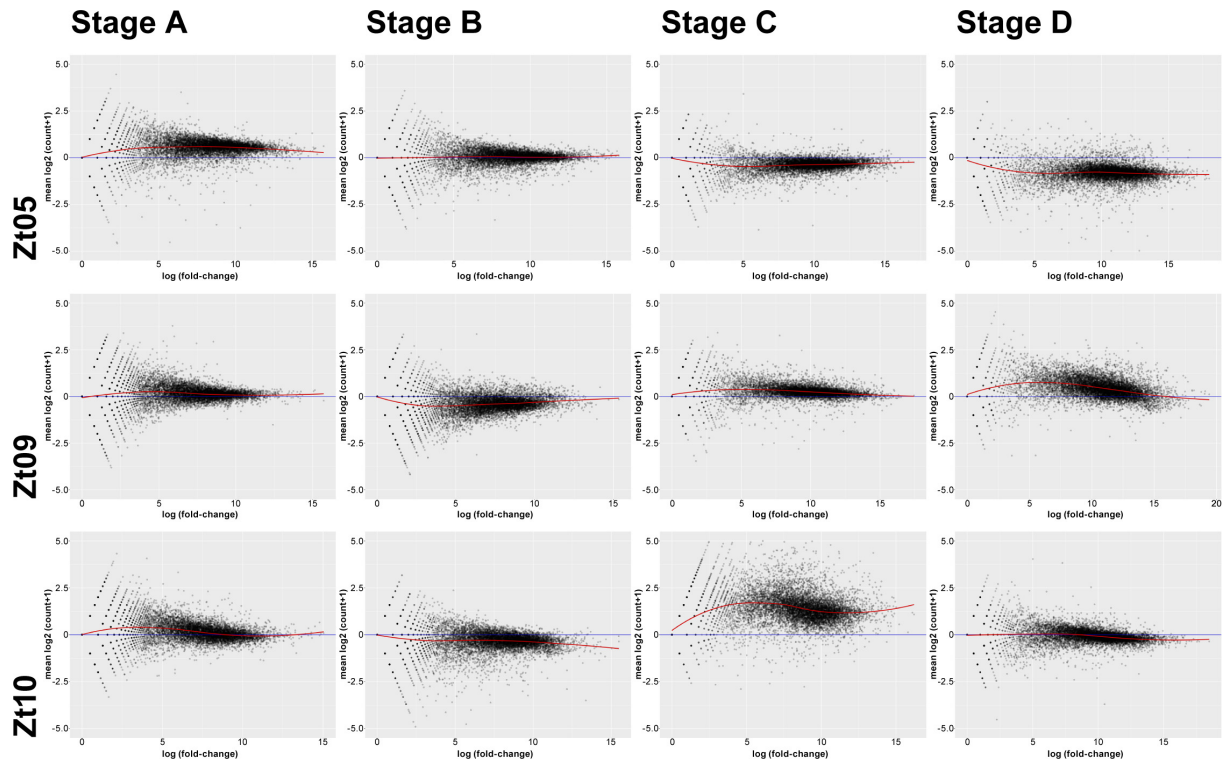

1248

1249

1250 **S10 Figure. MA plots comparing replicates for each RNA-seq dataset.**

1251 Pairwise comparisons of replicates for each wheat infection stage of each *Z. tritici* isolate without  
1252 normalization. x-axis: mean log<sub>2</sub> (read count per gene+1), y-axis: log (fold-change). The greatest  
1253 variation among replicates was between the Zt10 stage C datasets.

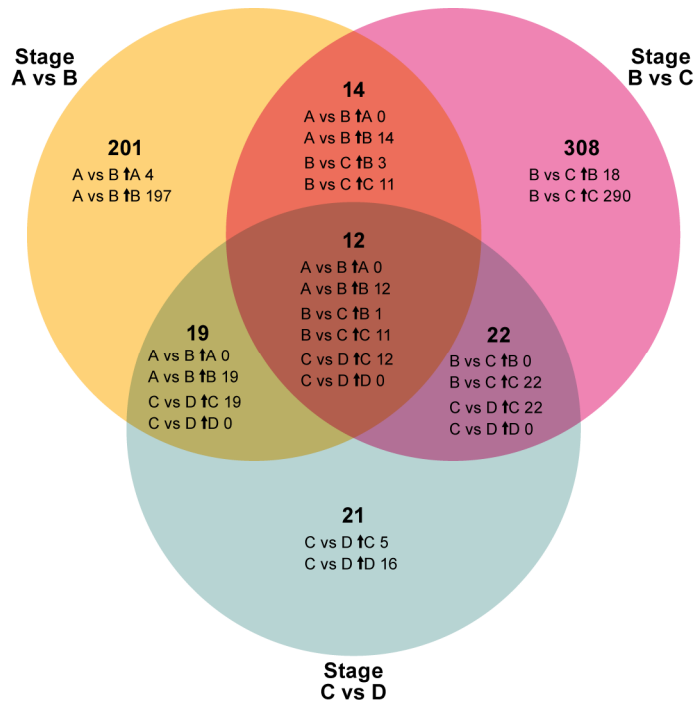

1254

1255

1256 **S11 Figure. 597 genes are differentially expressed between the infection stages in all three**  
1257 **isolates, and 79 genes are differentially expressed between more than two stages.**

1258 The Venn diagram illustrates how genes that are differentially expressed between *Z. tritici*  
1259 infection stages are shared between stage comparisons. Differential expression analyses were  
1260 performed with DESeq2. Differentially expressed genes have  $P_{adj} \leq 0.01$  and an absolute  $\log_2$  fold  
1261 change between infection stages of  $\geq 2$ . Small arrows (↑) indicate the stage in which genes are  
1262 significantly up-regulated.

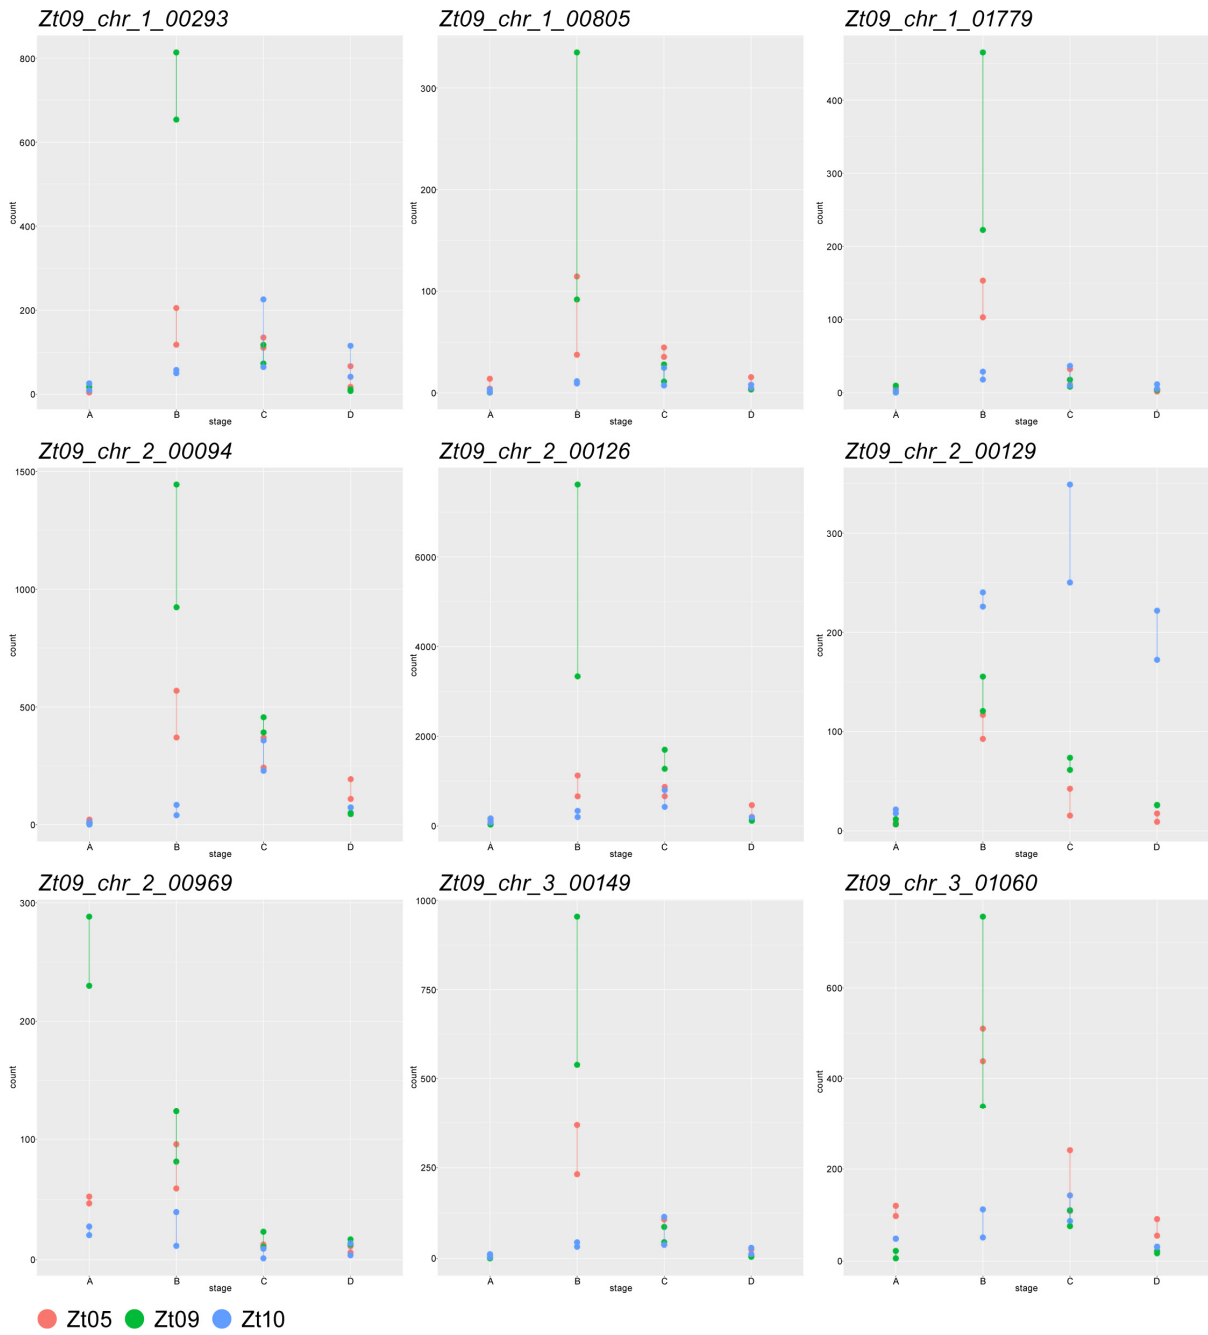

1263

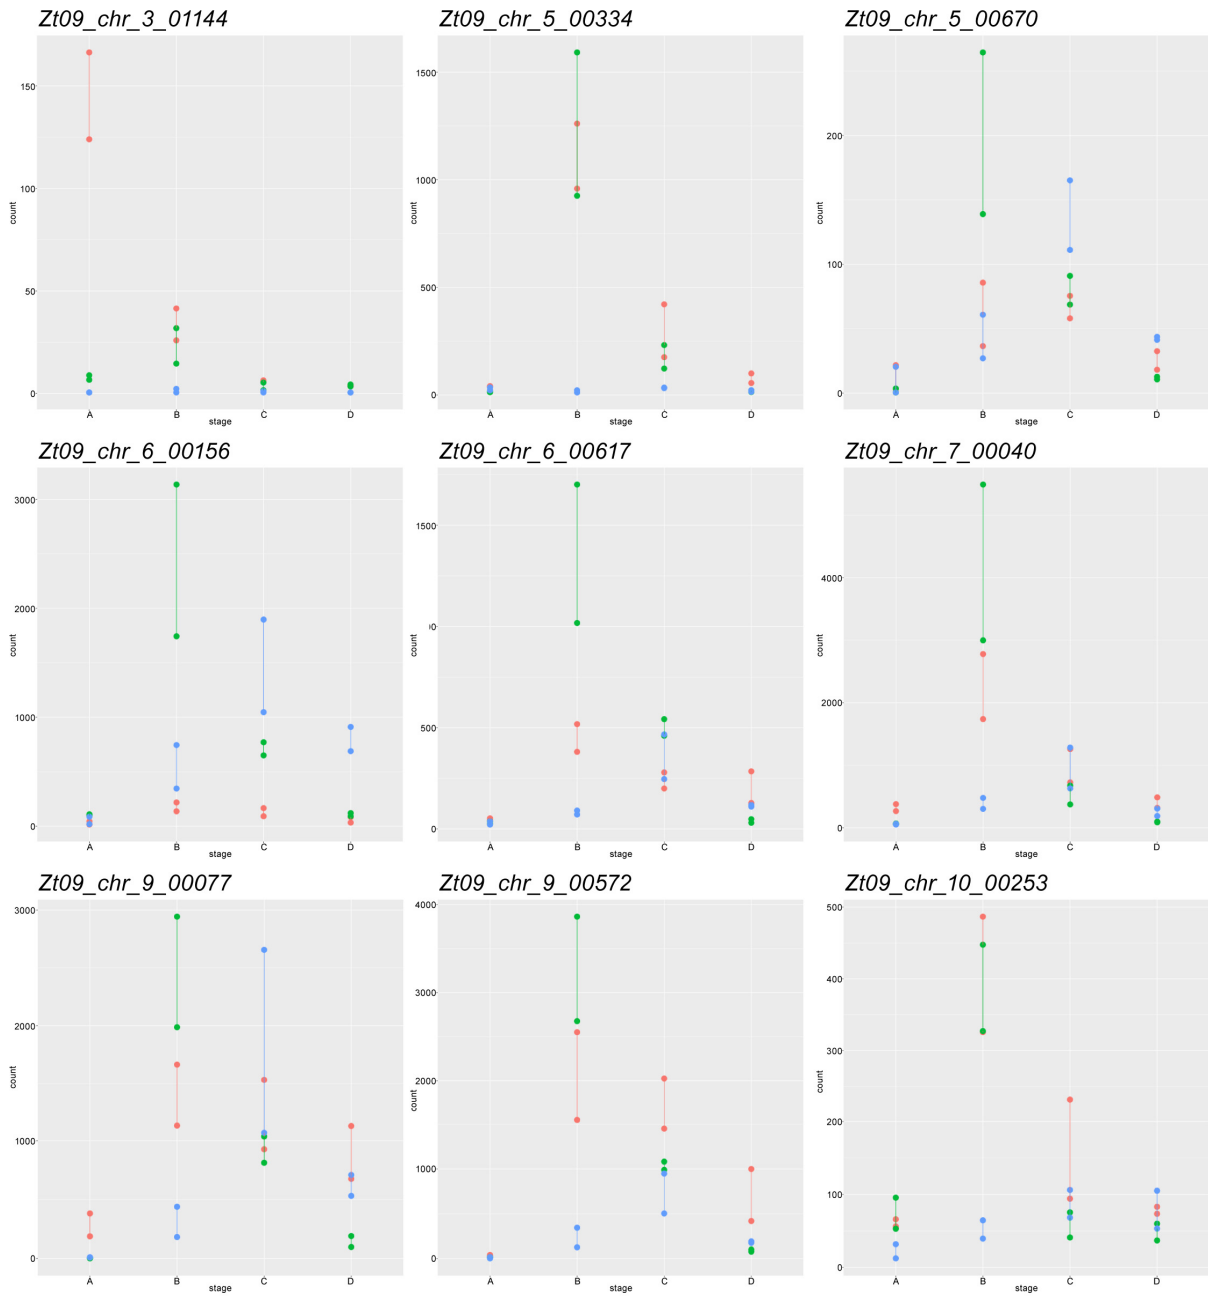

1264

● Zt05 ● Zt09 ● Zt10

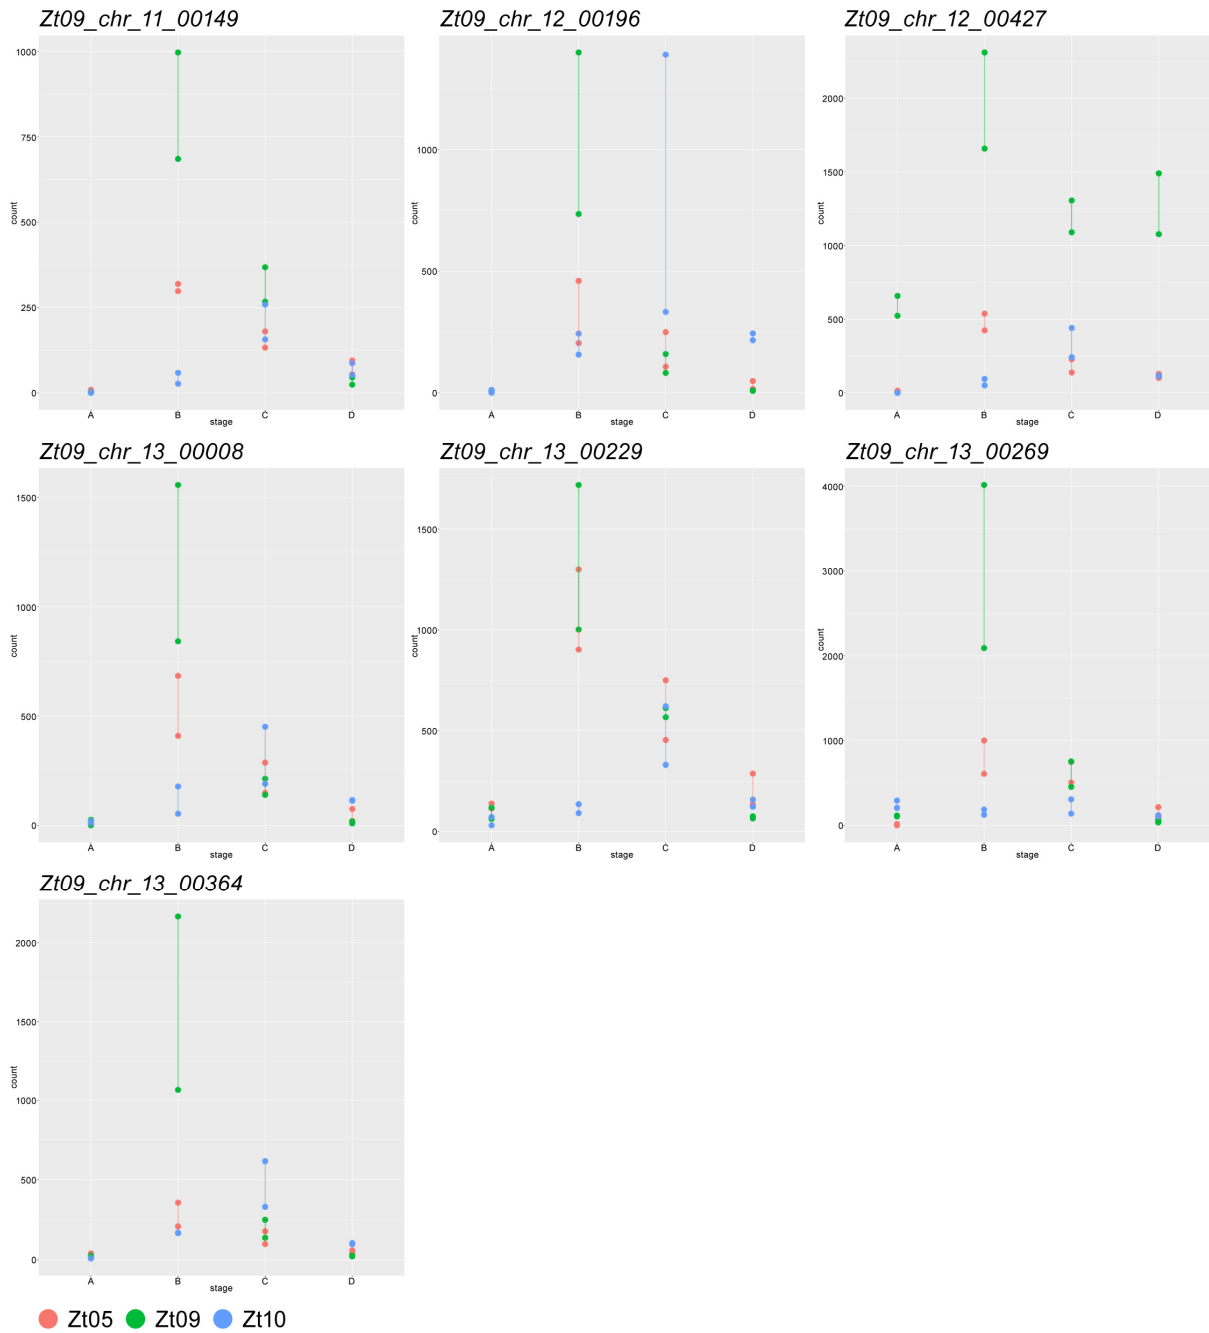

1267 **S12 Figure 1-3. Expression profiles of core *Z. tritici* biotrophic effector candidates based on**  
1268 **normalized read counts per gene.**

1269 Read counts were normalized across the four core infection stages (A to D) and the three *Z. tritici*  
1270 isolates Zt05, Zt09, and Zt10 and represent a measure of relative gene expression between  
1271 infection stages and between isolates.



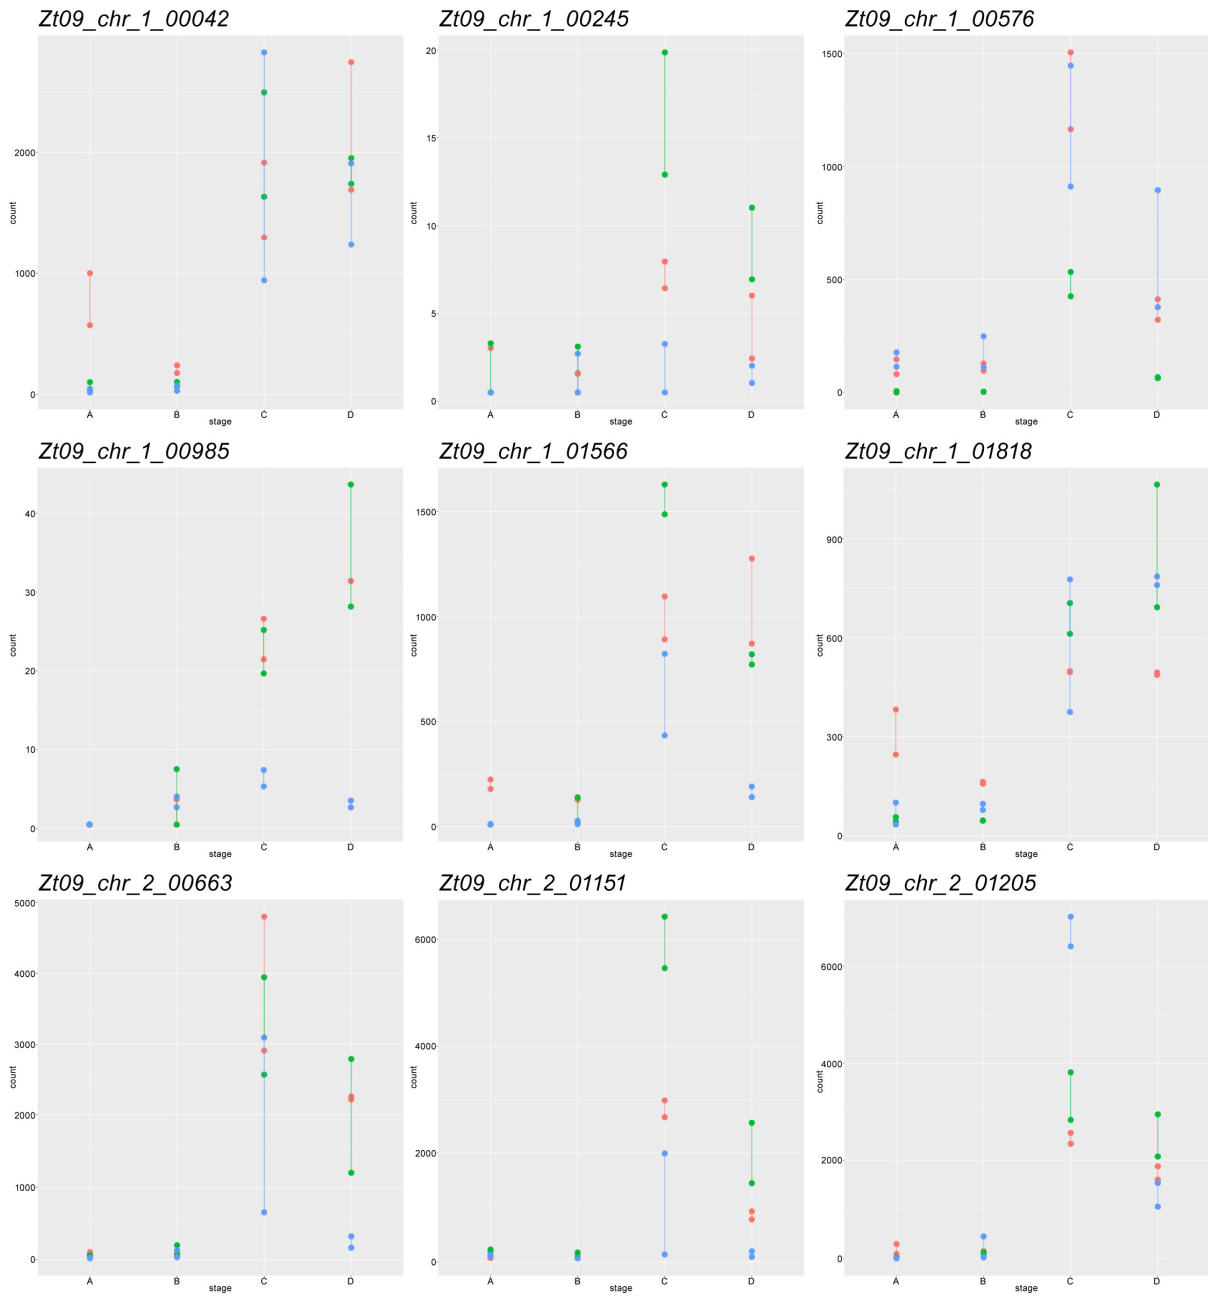

1272

● Zt05 ● Zt09 ● Zt10

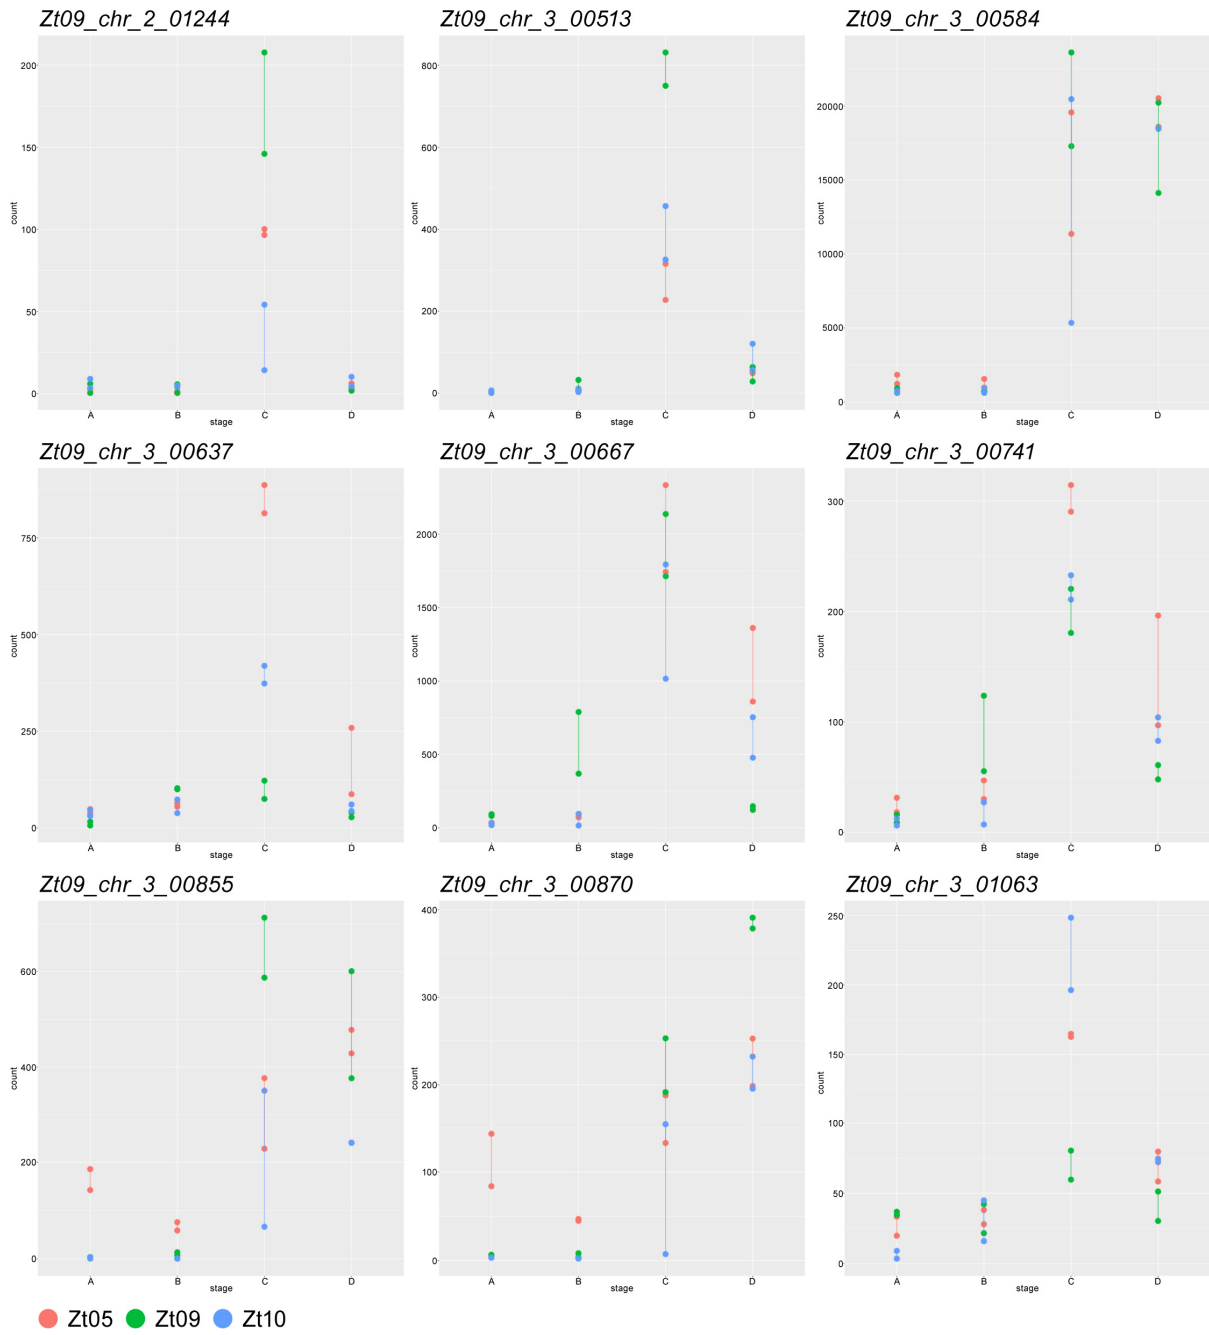

1273

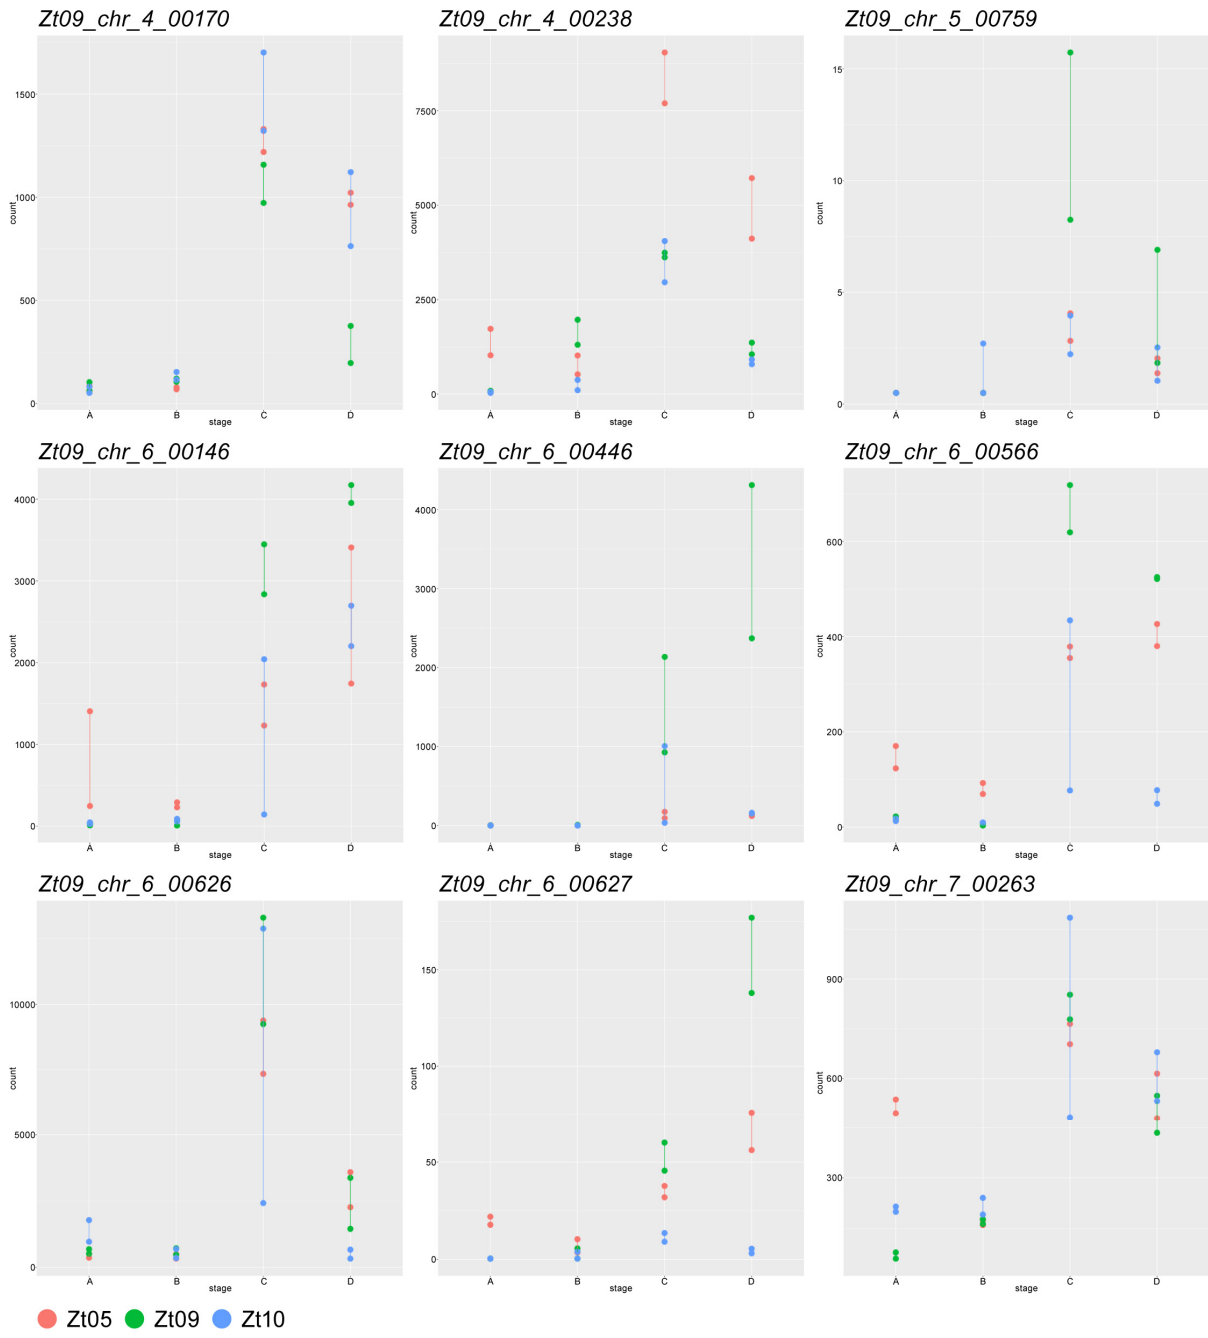

1274

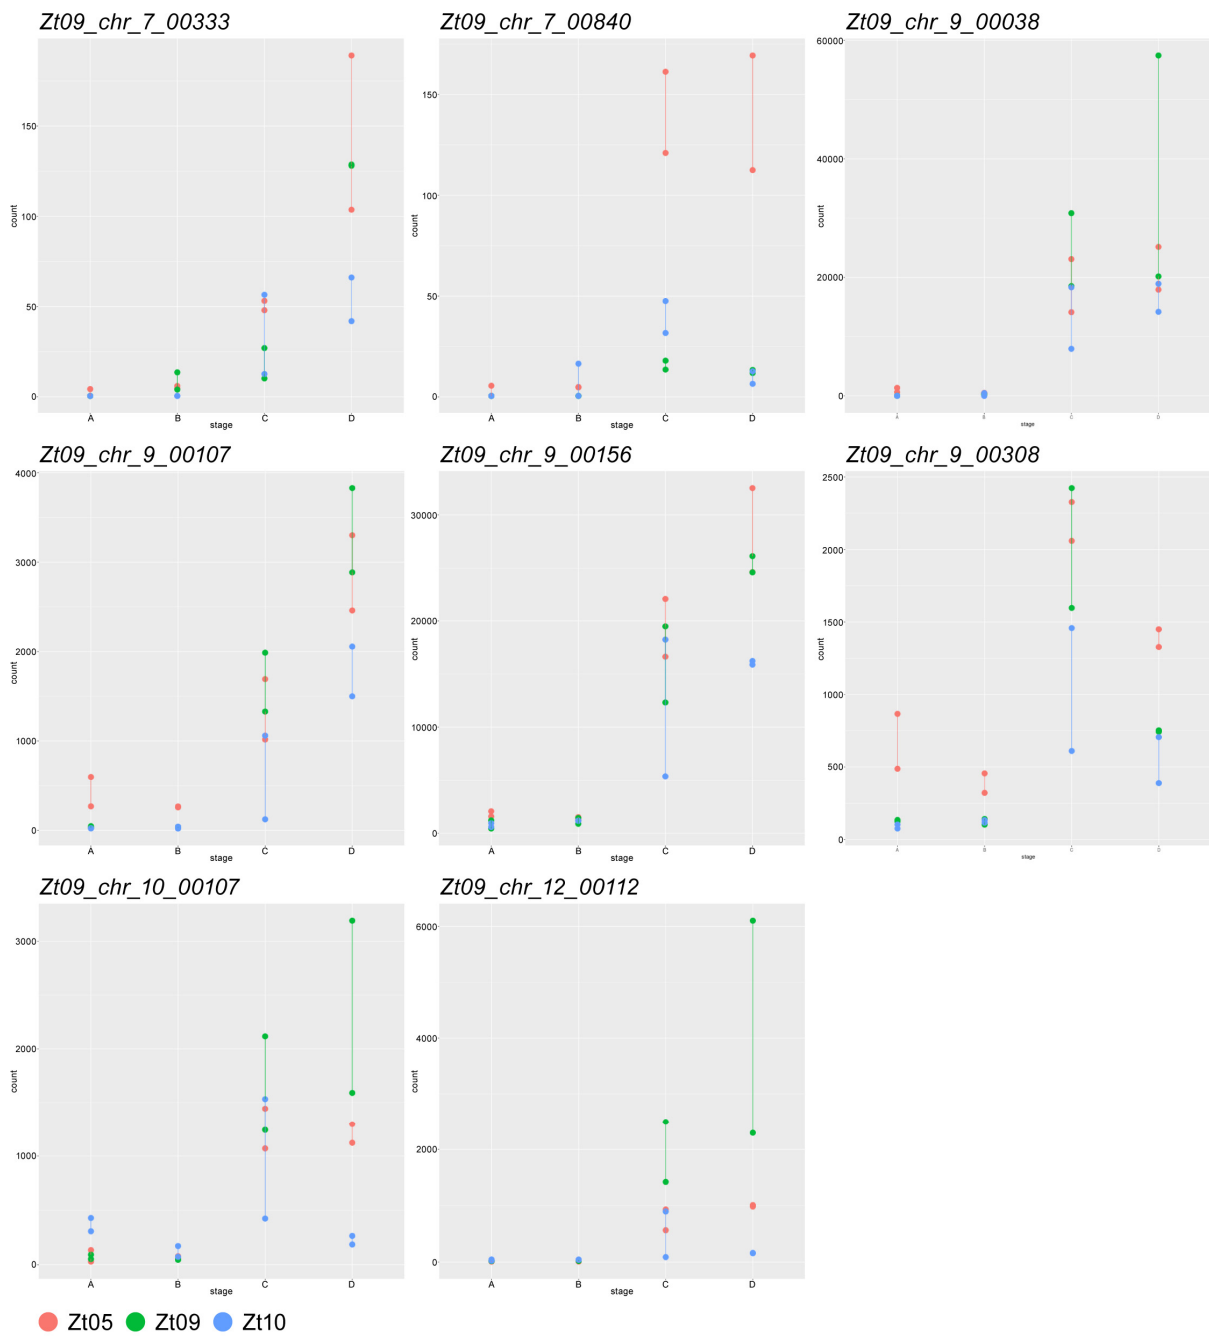

1275

1276

1277 **S13 Figure 1-4. Expression profiles of *Z. tritici* core necrotrophic effector candidates based**  
1278 **on normalized read counts per gene.**

1279 Read counts were normalized across the four core infection stages (A to D) and the three *Z. tritici*  
1280 isolates Zt05, Zt09, and Zt10 and represent a measure of relative gene expression between  
1281 infection stages and between isolates.

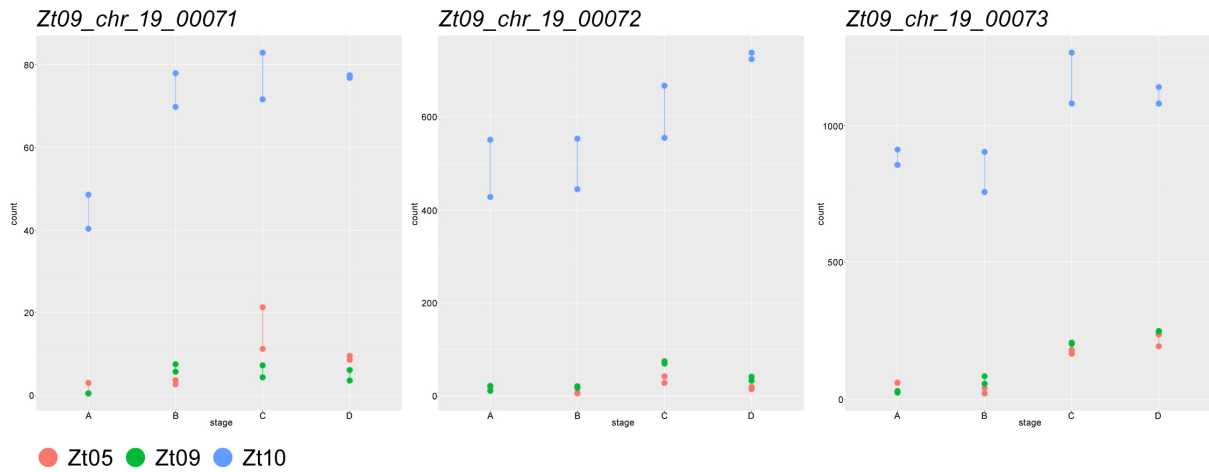

1282

1283

1284 **S14 Figure. Expression profiles of three *Z. tritici* genes located on accessory chromosome**  
1285 **19 in Zt09.**

1286 The neighboring genes *Zt09\_chr\_19\_00071*, *Zt09\_chr\_19\_00072*, and *Zt09\_chr\_19\_00073* are  
1287 significantly higher expressed in Zt10 during all four infection stages. Read counts were  
1288 normalized across the four core infection stages (A to D) and the three *Z. tritici* isolates (Zt05,  
1289 Zt09, and Zt10) and represent a measure of relative gene expression between infection stages and  
1290 between isolates.

1291

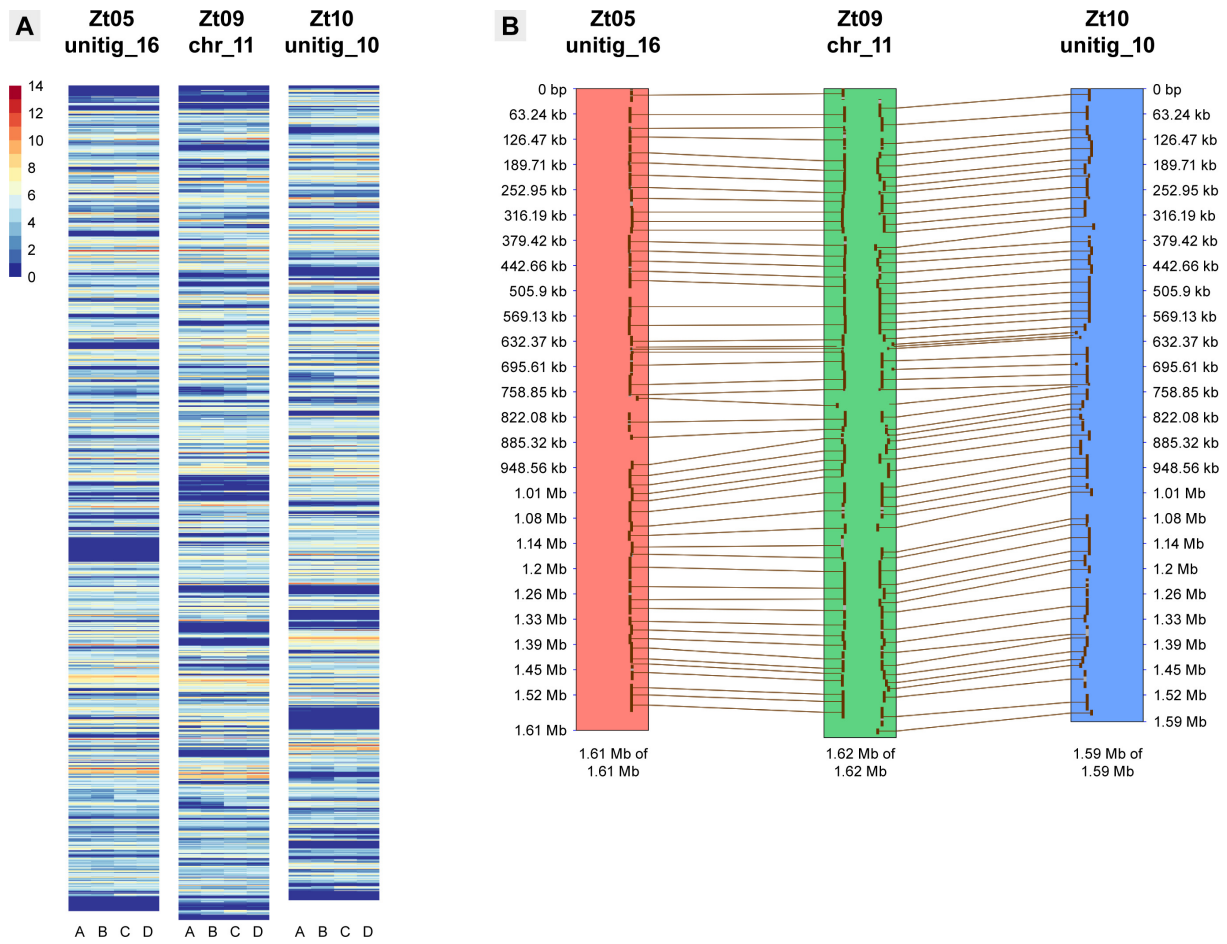

1292

1293

1294 **S15 Figure. Distribution of transcriptionally active loci on core chromosome 11.**

1295 **(A)** Heatmaps of log<sub>2</sub>-transformed FPKM expression values for 1-kb windows along IPO323/Zt09  
1296 core chromosome 11 and unitigs 16 and 10 in Zt05 and Zt10 for the four wheat infection stages.

1297 **(B)** Synteny plot comparing IPO323/Zt09 chromosome 11 and unitigs 16 and 10 in Zt05 and Zt10.

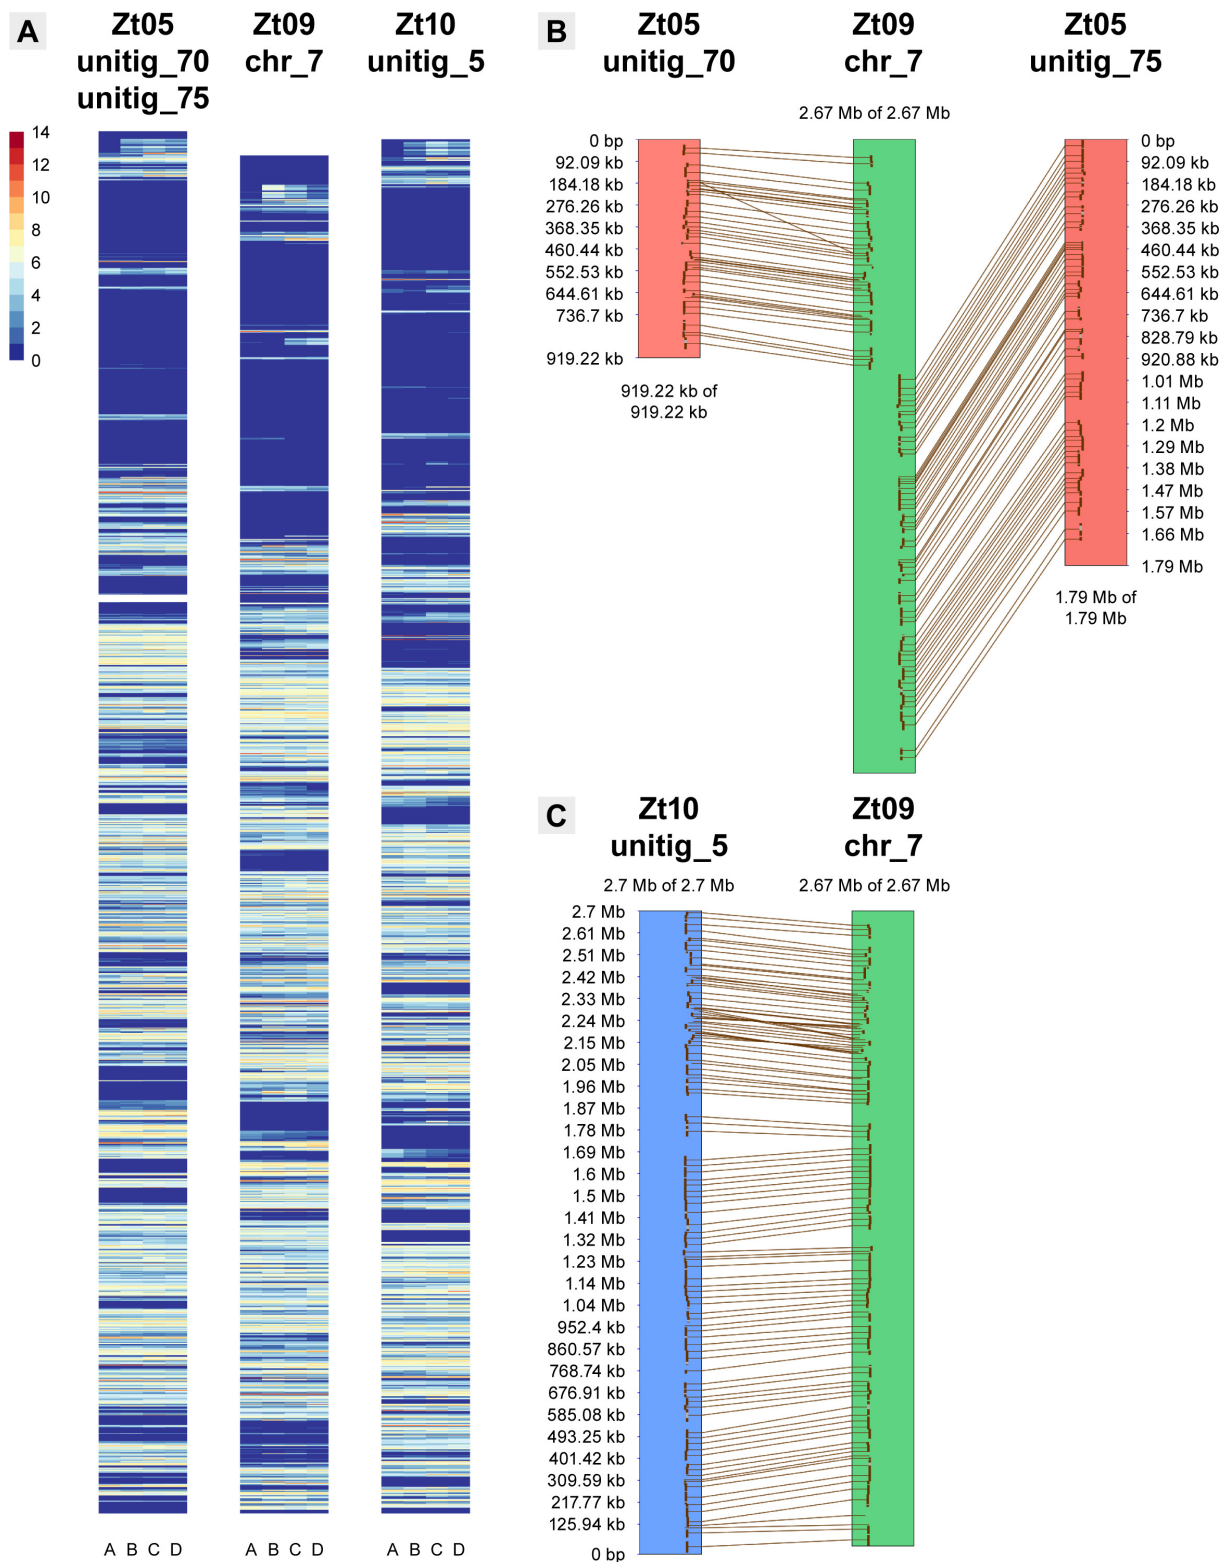

1298

1299 **S16 Figure. Distribution of transcriptionally active loci on core chromosome 7.**

1300 **(A)** Heatmaps of log<sub>2</sub>-transformed FPKM expression values for 1-kb windows along IPO323/Zt09  
 1301 core chromosome 7 and unitig 5 in Zt10 and unitigs 70 and 75 in Zt05 for the four wheat infection  
 1302 stages. **(B)** Synteny plots comparing IPO323/Zt09 chromosome 7 and unitigs 70 and 75 of Zt05  
 1303 and **(C)** unitig 5 of Zt10.

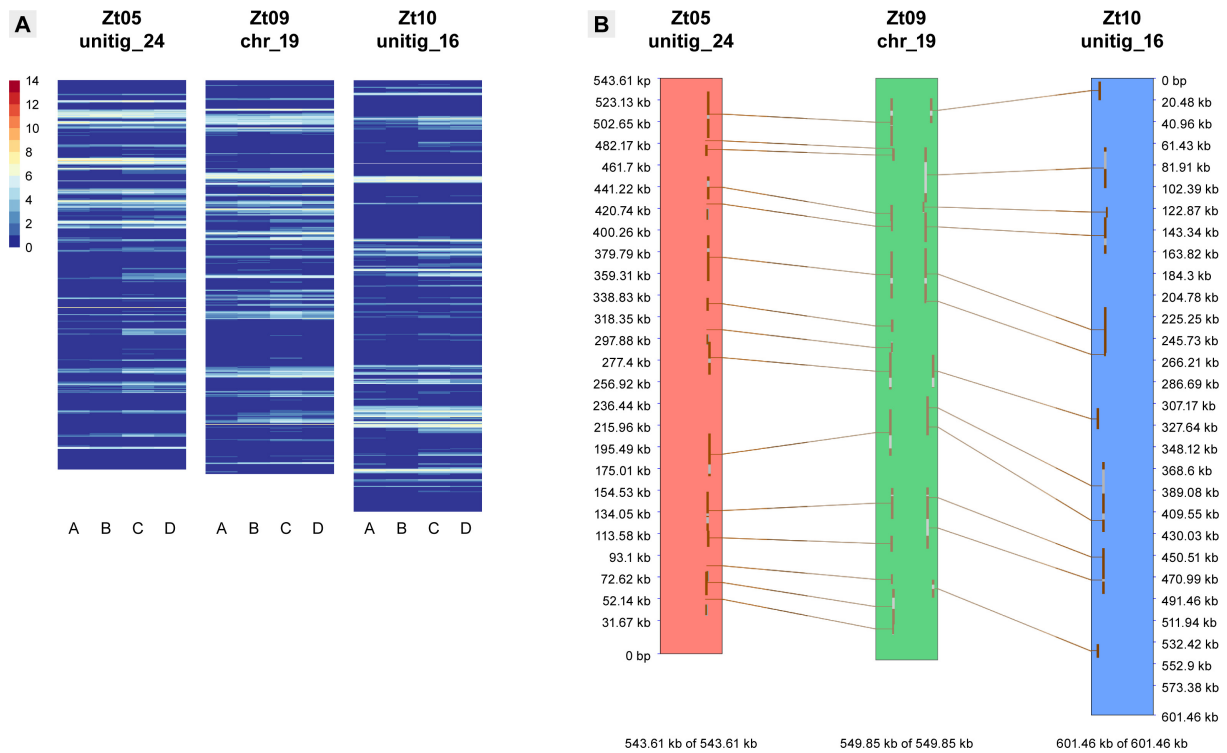

1304

1305

1306 **S17 Figure. Distribution of transcriptionally active loci on accessory chromosome 19.**

1307 **(A)** Heatmaps of log<sub>2</sub>-transformed FPKM expression values for 1-kb windows along IPO323/Zt09  
1308 accessory chromosome 19 and the syntenic unitigs 24 and 16 in Zt05 and Zt10 for the four wheat  
1309 infection stages. **(B)** Synteny plot comparing IPO323/Zt09 chromosome 19 and unitigs 24 and 16  
1310 of Zt05 and Zt10, respectively.

1311



1312 **S1 Animation. *Z. tritici* initial wheat infection stage.**

1313 Tomographic animation of confocal image z-stack showing infection hypha of *Z. tritici* isolate Zt09  
1314 entering wheat leaf tissue by open stoma at 4 dpi. The hypha grows closely attached to stomatal  
1315 guard cell. Nuclei and wheat cells are displayed in *purple* and fungal structures in *green*. Reference  
1316 transmitted images are in *grey*. Scale bar = 25  $\mu\text{m}$ .

1317

1318 **S2 Animation. *Z. tritici* initial wheat infection stage.**

1319 Tomographic animation of confocal image z-stack showing epiphyllous proliferation, infecting  
1320 hyphae, and hyphal growth inside wheat sub-stomatal cavity and mesophyll of *Z. tritici* isolate  
1321 Zt05 at 3 dpi. Nuclei and wheat cells are displayed in *purple* and fungal structures in *green*.  
1322 Reference transmitted images are in *grey*. Scale bar = 25  $\mu\text{m}$ .

1323

1324 **S3 Animation. Biotrophic colonization of wheat mesophyll by *Z. tritici* Zt05.**

1325 Tomographic animation of confocal image z-stack showing epiphyllous hyphae as well as the  
1326 dense biotrophic intercellular hyphal network of *Z. tritici* isolate Zt05 inside wheat mesophyll at  
1327 7 dpi. Long, straight hyphae grow in the interspace of wheat epidermis and mesophyll cells.  
1328 Hyphae grow in close contact to plant cells. Nuclei and wheat cells are displayed in *purple* and  
1329 fungal structures in *green*. Scale bar = 50  $\mu\text{m}$ .

1330

1331 **S4 Animation. Biotrophic colonization of wheat mesophyll by *Z. tritici* Zt09.**

1332 Tomographic animation of confocal image z-stack showing biotrophic intercellular hyphae of  
1333 *Z. tritici* isolate Zt09 inside wheat leaf tissue at 11 dpi. Nuclei and wheat cells are displayed in  
1334 *purple* and fungal structures in *green*. Reference transmitted images are in *grey*. Scale bar = 25  $\mu\text{m}$ .

1335

1336 **S5 Animation. *Z. tritici* Zt05 pycnidium development.**

1337 Tomographic animation of confocal image z-stack showing the development of primal structures  
1338 of *Z. tritici* Zt05 pycnidium in the wheat sub-stomatal cavity during the early lifestyle transition  
1339 stage at 11 dpi. Nuclei and wheat cells are displayed in *purple* and fungal structures in *green*.  
1340 Reference transmitted images are in *grey*. Scale bar = 25  $\mu\text{m}$ .

1341

1342 **S6 Animation. *Z. tritici* Zt09 pycnidium development.**

1343 Tomographic animation of confocal image z-stack showing the development of primal structures  
1344 of *Z. tritici* Zt09 pycnidium in the wheat sub-stomatal cavity during the lifestyle transition stage at  
1345 13 dpi. Nuclei and wheat cells are displayed in *purple* and fungal structures in *green*. Reference  
1346 transmitted images are in *grey*. Scale bar = 25  $\mu\text{m}$ .

1347

1348 **S7 Animation. Development of two pycnidium initials of *Z. tritici* Zt10.**

1349 Tomographic animation of confocal image z-stack showing *Z. tritici* Zt10 pycnidium in the wheat  
1350 sub-stomatal cavity developing from two initial stomata during the early lifestyle transition stage  
1351 at 13 dpi. Nuclei and wheat cells are displayed in *purple* and fungal structures in *green*. The  
1352 fluorescence of *Z. tritici* hyphae inside plant tissue is very weak. *Purple* fungal nuclei are mainly  
1353 visible. Reference transmitted images are in *grey*. Scale bar = 25  $\mu\text{m}$ .

1354

1355 **S8 Animation. Mature pycnidia of *Z. tritici* Zt05.**

1356 Tomographic animation of confocal image z-stack showing asexual pycnidia of *Z. tritici* isolate  
1357 Zt05 with pycnidiospores during necrotrophic infection stage at 21 dpi. The intercellular space of  
1358 wheat mesophyll is densely colonized by *Z. tritici* hyphae. Nuclei and wheat cells are displayed in  
1359 *purple* and fungal structures in *green*. The fluorescence of *Z. tritici* hyphae inside the plant tissue  
1360 is weak. *Purple* fungal nuclei are mainly visible. Reference transmitted images are in *grey*. Scale  
1361 bar = 50  $\mu\text{m}$ .

1362

1363 **S9 Animation. Pycnidium of *Z. tritici* Zt09.**

1364 Tomographic animation of confocal image z-stack showing asexual pycnidium of *Z. tritici* isolate  
1365 Zt09 at 20 dpi. Hyphae grow in close contact to collapsing wheat mesophyll cells. Nuclei and wheat  
1366 cells are in *purple* and fungal structures in *green*. Reference transmitted images are in *grey*. Scale  
1367 bar = 25  $\mu\text{m}$ .

1368

## 1369 **Supporting information – S1 Text**

1370

### 1371 **Supplementary Results**

#### 1372 **Comparative analysis of *Z. tritici* infection development by confocal microscopy**

1373 We set out to characterize the infection development of the three *Z. tritici* isolates Zt05, Zt09 and  
1374 Zt10 on the surface as well as within wheat leaves. To this end, we conducted a detailed survey  
1375 where we analyzed leaf material harvested at 3-5, 7, 8, 10-14, 17, 19-21, 25, and 28 days after  
1376 inoculation (dpi) by confocal laser-scanning microscopy. We used large z-stacks of longitudinal  
1377 optical sections to reconstruct the spatial and temporal fungal colonization outside and within  
1378 infected tissue. We first focused on shared characteristics of the three *Z. tritici* isolates during host  
1379 colonization and reproduction. Thereby, as described in details below, we identified four distinct  
1380 infection stages that we define as the core *Z. tritici* infection program (Fig 3). Furthermore, we  
1381 characterized the differences and isolate-specific aspects of infection development of the three  
1382 isolates including temporal, spatial, and quantitative variation of host colonization.

1383

#### 1384 **The shared core infection program of *Z. tritici* is characterized by four infection** 1385 **stages**

1386 The first infection stage A is the penetration of wheat leaf tissue by *Z. tritici* hyphae. Germination  
1387 of fungal cells on the leaf surface is initiated and developing infection hyphae enter wheat stomata.  
1388 We observed that germ tubes emerge from *Z. tritici* cells at different time points post inoculation  
1389 indicating that the fungi sense and respond to particular host-derived cues that trigger the  
1390 developmental switch from spores to hyphal growth [1]. Germ tubes develop into filaments of  
1391 which some grow directed towards stomatal openings and enter the leaf (Fig 3A, stage A, S1 and  
1392 S2 Animation). Occasionally, we noticed slight, spatially restricted swelling of hyphae on top of  
1393 stomata that resemble primitive appressoria as also previously reported [2,3]. However, we never  
1394 observed a direct penetration of epidermal cells. During stomatal passage and in the sub-stomatal  
1395 cavities, *Z. tritici* infection hyphae grow in tight contact to the wheat guard cells. The close physical  
1396 contact between hyphae and plant cells might facilitate delivery of *Z. tritici* effector molecules [4]  
1397 or serve as a structural scaffold to direct fungal hyphae in the host tissue [5]. However, not all  
1398 inoculated *Z. tritici* cells caused stomatal penetrations. We found that a portion of cells did not  
1399 form germ tubes within 28 dpi and that development of filaments was stopped before entering  
1400 stomata; what we also expect to happen in field infections.

1401 The subsequent infection stage B is characterized by biotrophic growth of *Z. tritici* and the  
1402 symptomless colonization of wheat mesophyll (Fig 3A, stage B, S3 and S4 Animation). For  
1403 successful infections, the pathogen must avoid recognition by the host immune system and/or

1404 suppress activation of defense responses during biotrophic growth. We observed strict  
1405 intercellular hyphal colonization, starting from sub-stomatal cavities into adjacent mesophyll  
1406 tissue, whereat the hyphae grow in close contact with host cells. Remarkably, hyphae first grow  
1407 in the interspace of epidermis and first mesophyll layer. There, hyphae spread in the grooves  
1408 between adjacent epidermal cells and only subsequently explore subjacent mesophyll cell layers.  
1409 The transition from symptomless biotrophic to necrotrophic colonization and the development of  
1410 disease symptoms like chlorosis and necrotic lesions represent the third infection stage C (Fig 3A,  
1411 stage C). From there on, *Z. tritici* colonizes a biochemically changing host environment (Fig 2B)  
1412 and feeds on nutrients released by the host cell death to build pycnidia. Hyphae are branching and  
1413 grow in all mesophyll layers, surrounding individual wheat mesophyll cells. Simultaneously,  
1414 primal structures of the asexual fruiting bodies, the pycnidia, are established and begin to develop.  
1415 Hyphae form ring-like scaffolds in the sub-stomatal cavities where hyphae align and build  
1416 stomata (S5-S7 Animation) that later give rise to conidiogenous cells.  
1417 The last stage D concludes the infection and is characterized by necrotrophic colonization and  
1418 asexual reproduction (Fig 3A, stage D). *Z. tritici* hyphae eventually grow in an environment that is  
1419 very nutrient rich and attractive to other microbial competitors, but also putatively toxic e.g. due  
1420 to high concentrations of reactive oxygen species (Fig 2B) In necrotic leaf regions, the dead  
1421 mesophyll tissue is heavily colonized and the asexual fruiting bodies are visible and matured  
1422 (S8 and S9 Animation). Hyphae wrap around dead, collapsed mesophyll cells several times. The  
1423 pathogen may keep this tight contact to the degrading plant cells to increase the acquisition of  
1424 nutrients and maybe also to protect them from competing saprotrophic species. Sub-stomatal  
1425 cavities within the colonized leaf areas are occupied by sub-globose pycnidia that can grow into  
1426 the adjacent mesophyll tissue. Mature pycnidia harbour hyaline, oblong asexual pycnidiospores  
1427 that are released through the former stomatal opening.  
1428 In general, the described infection stages of *Z. tritici* can be well distinguished by considering the  
1429 majority of all infection events within inoculated leaf regions. However, we also observed that  
1430 different infections stages are present simultaneously within one leaf. Infections by individual  
1431 *Z. tritici* cells occur within a temporal range after inoculation and are not fully synchronized.  
1432 Moreover, environmental influences and host physiological processes act differently on individual  
1433 leaves and plants which also can lead to the temporal variation in infection development of  
1434 *Z. tritici*.

1435

### 1436 **Highly differentiated infection phenotypes of the three *Z. tritici* isolates on Obelisk** 1437 **wheat**

1438 Although we clearly recognize the four core infection stages for the three *Z. tritici* isolates, we  
1439 found that the infection phenotypes of Zt05, Zt09, and Zt10 are highly differentiated. We observed

1440 temporal, spatial and quantitative variation in the infection development of these isolates on the  
1441 wheat cultivar Obelisk.

1442 The duration of the initial infection stage A—in particular the period between inoculation and  
1443 stomatal penetrations—is different in the three *Z. tritici* isolates. For Zt05, infection hyphae enter  
1444 stomata within 5 dpi. Germ-tube formation and stomatal penetration is usually slower for Zt09  
1445 (up to 8 dpi) and most delayed for Zt10 (up to 10 dpi) (Fig 3A, stage A). We also noticed strong  
1446 epiphyllous proliferation and mycelium formation for Zt05 during all infection stages and  
1447 frequently, several infection hyphae of Zt05 enter one stoma (Fig 3A, stage A: Zt05). In general,  
1448 hyphae of Zt05 and Z09 penetrate stomata at high frequencies, while we saw fewer stomatal  
1449 penetrations for the Zt10 leading to patchy infections within the inoculated leaf areas (Fig 3A,  
1450 stage C and D: Zt10).

1451 The extent of biotrophic colonization during infection stage B comprises the most pronounced  
1452 difference between the three isolates. Zt05 builds biotrophic hyphal networks in the mesophyll  
1453 tissue with long “runner” hyphae growing primarily longitudinally between epidermis and  
1454 mesophyll (Fig 3A, stage B: Zt05, Fig 3B.1, S3 Animation). Biotrophic hyphal networks of Zt09 are  
1455 smaller and located mainly in the interspace of epidermis and mesophyll as well as between the  
1456 cells of the upper mesophyll layer (Fig 3A, stage B: Zt09, Fig 3B.2). Biotrophic colonization by Zt10,  
1457 however, is very poor and hyphal growth is limited to the mesophyll cells adjacent to sub-stomatal  
1458 cavities (Fig 3A, stage B: Zt10, Fig 3B.3). Since biotrophic colonization depends on successful  
1459 evasion of host immunity [6], the different extent of colonization could reflect different strategies  
1460 to bypass recognition in a given host genotype.

1461 During the later infection stages, differences between the isolates are smaller and primarily relate  
1462 to temporal variation. Transition to necrotrophic growth usually first occurs for Zt05 (9 to 14 dpi),  
1463 followed by Zt09 (13 to 16 dpi), and Zt10 (13 and 17 dpi) (Fig 3A, stage C). Studying the  
1464 development of the asexual fruiting bodies, we frequently noticed the formation of two pycnidia  
1465 in one sub-stomatal cavity for Zt10 (Fig 3A, stages C and D: Zt10, S7 Animation). This was observed  
1466 less often for the other two isolates. The onset of infection stage D occurs in the same temporal  
1467 order as for stage C, first for Zt05, followed by Zt09, and last by Zt10. At 28 dpi, inoculated leaf  
1468 areas are usually fully necrotic for Zt09 and frequently covered by several distinct necrotic lesions  
1469 for Zt10 (S1 Fig).

1470 Taken together, we observed highly differentiated infection phenotypes for the three *Z. tritici*  
1471 isolates due to isolate-specific infection development. However, the final production of asexual  
1472 pycnidia did not differ significantly between the three isolates (Fig 1), suggesting that the isolate-  
1473 specific aspects in host-pathogen interaction sum up to equally good strategies for host  
1474 colonization and asexual reproduction.

1475 With several independent plant infection experiments using the three isolates Zt05, Zt09, and  
1476 Zt10 on the wheat cultivar Obelisk, we found that the temporal disease progress and,  
1477 consequently, the duration of the different infection can stages vary between experiments.  
1478 However, although the precise timing for the onset of the four stages can differ between  
1479 experiments, the relative temporal differences between the isolates, as described above, remain  
1480 consistent.

1481

### 1482 **Karyotypes and synteny analyses of the three *Z. tritici* isolates**

1483 Putatively dispensable chromosomes in the size range of 225 to 1,125 kb were separated by  
1484 pulsed-field gel electrophoresis (PFGE) and visualized for the three *Z. tritici* isolates (S4 Fig). The  
1485 previously reported loss of chromosome 18 (~574 kb) in Zt09 [7] could not be demonstrated by  
1486 PFGE, as the chromosome could not be separated from the chromosomes 17 (~584 kb) and 16  
1487 (~607 kb) with almost the same size.

1488 We observed intense chromosomal bands around 540 kb and 710 kb in Zt05 and around 615 kb  
1489 in Zt10 (S4 Fig). This indicates that both isolates possess additional chromosomes to the seven  
1490 (Zt05) and four (Zt10) chromosomes that we identified based on separated chromosomal bands  
1491 by PFGE. Indeed, analyses of *de novo* genome assemblies based on long-read SMRT Sequencing  
1492 data for Zt05 and Zt10, show eight and five mainly full chromosome unitigs (indicated by  
1493 telomeric repeats at both ends) in the size range of 290 to 905 kb (S2 Table) with synteny to  
1494 IPO323/Zt09 chromosomes 14 to 21 (S5 and S6 Fig).

1495 On the PFGE gel, we identified a chromosomal band around 640 kb for Zt10 that possibly  
1496 represents unitig 15 (634 kb). This unitig shares no synteny with an IPO323 chromosome  
1497 suggesting that this is a hitherto not described accessory chromosome in the species. However, as  
1498 there is only one telomeric repeat present at one end of unitig 15 the assembly does not represent  
1499 the full chromosome. Moreover, transcribed regions on unitig 15 are syntenic to a larger block on  
1500 Zt05 unitig 20 that was identified as homologous to chromosome 18 of IPO323. We further  
1501 conducted blast searches with the sequences of the transcribed regions on unitig 15 and received  
1502 hits for genes on chromosomes 18, 20, and 21 of the reference IPO323/Zt09 indicating breakage  
1503 of macrosynteny [8].

1504

### 1505 **Percentage of mapped RNA-seq reads reflects infection stage-specific fungal 1506 biomass**

1507 For transcriptome datasets representing initial infection (stage A) and biotrophic growth  
1508 (stage B), where comparably little fungal biomass is present and the wheat tissue is still fully  
1509 intact, on average 8.02% and 8.2% of the filtered reads were aligned to the fungal genomes (Table  
1510 2, S5 Table). Exceptionally high alignment rates were obtained for isolate Zt05, (average stage A:

1511 13.52%, average stage B: 12.41%), likely reflecting the strong proliferation on the leaf surface as  
1512 well as the expanded biotrophic hyphal networks (Fig 3: Zt05, S3 Animation). For RNA-seq  
1513 samples covering the lifestyle transition (stage C) and necrotrophic growth (stage D), where  
1514 *Z. tritici* hyphal networks rapidly expand and the wheat mesophyll cells die, the amount of fungal-  
1515 derived reads increased to 23.95% and 55% on average, respectively. The constant increase in  
1516 fungal-derived RNA-seq reads during wheat infection reflects the increase in fungal biomass  
1517 within the leaf tissue due to mesophyll colonization and lifestyle transition.

1518

## 1519 **References**

- 1520 1. Turrà D, El Ghalid M, Rossi F, Di Pietro A (2015) Fungal pathogen uses sex pheromone  
1521 receptor for chemotropic sensing of host plant signals. *Nature* 527: 521–524.
- 1522 2. Cohen L, Eyal Z, Aviv T (1993) The histology of processes associated with the infection of  
1523 resistant and susceptible wheat cultivars with *Septoria tritici*. *Plant Pathol* 42: 737–743.  
1524 doi:10.1111/j.1365-3059.1993.tb01560.x.
- 1525 3. Kema GHJ, Yu D, Rijkenberg FHJ, Shaw MW, Baayen RP (1996) Histology of pathogenesis of  
1526 *Mycosphaerella graminicola* in wheat. *Phytopathology* 7: 777–786. doi:10.1094/Phyto-86-  
1527 777.
- 1528 4. Lo Presti L, Lanver D, Schweizer G, Tanaka S, Liang L, et al. (2015) Fungal Effectors and  
1529 Plant Susceptibility. *Annu Rev Plant Biol* 66: 513–545.
- 1530 5. Tucker SL, Talbot NJ (2001) Surface attachment and pre-penetration stage development  
1531 by plant pathogenic fungi. *Annu Rev Phytopathol* 39: 385–417.
- 1532 6. Jones JDG, Dangl JL (2006) The plant immune system. *Nature* 444: 323–329.
- 1533 7. Kellner R, Bhattacharyya A, Poppe S, Hsu TY, Brem RB, et al. (2014) Expression Profiling of  
1534 the Wheat Pathogen *Zymoseptoria tritici* Reveals Genomic Patterns of Transcription and  
1535 Host-Specific Regulatory Programs. *Genome Biol Evol* 6: 1353–1365.
- 1536 8. Hane JK, Rouxel T, Howlett BJ, Kema GH, Goodwin SB, et al. (2011) A novel mode of  
1537 chromosomal evolution peculiar to filamentous Ascomycete fungi. *Genome Biol* 12: R45.

1538

1539 **Supporting information – S2 Text**

1540

1541 **Supplementary Materials and Methods**

1542 **Detection of H<sub>2</sub>O<sub>2</sub> in *Z. tritici* infected wheat leaves**

1543 To visualize and localize the accumulation of the reactive oxygen species H<sub>2</sub>O<sub>2</sub> within *Z. tritici*  
1544 infected leaf tissue, we conducted 3,3'-diaminobenzidine (DAB) staining [1] at 4, 10, 14, 18, and  
1545 21 days post inoculation (dpi). Inoculated leaf parts were excised with a razorblade and immersed  
1546 in DAB solution (1 mg/mL 3,3'-diaminobenzidine tetrahydrochloride (Thermo Fisher Scientific,  
1547 Rockford, USA) in 0.05% [v/v] Tween 20). Samples were protected from light and DAB solution  
1548 was infiltrated in two steps: 1<sup>st</sup> at low pressure (600 mbar) for two times 15 min and 2<sup>nd</sup> at gentle  
1549 shaking (22 rpm) for 90 min. Subsequently, leaf samples were incubated overnight in de-staining  
1550 solution (96% ethanol: acetic acid = 3:1 [v/v]) at gentle shaking (25 rpm). Cleared samples were  
1551 stored in 96% ethanol and examined in 40% glycerol. Presence of H<sub>2</sub>O<sub>2</sub> is indicated by reddish-  
1552 brown precipitate in cleared leaf tissue. Infected leaf samples were documented by an iPhone 7  
1553 camera prior to the DAB staining and by a Canon EOS 600D post staining.

1554

1555 **Staining of infected wheat leaves and confocal laser-scanning microscopy**

1556 Infected leaf parts were excised and de-stained in 96% ethanol. Samples were transferred to 10%  
1557 KOH [w/v] at 85°C for 3 min to increase tissue permeability. For neutralization, leaf material was  
1558 washed three times with 1X phosphate-buffered saline (PBS, pH 7.4) and subsequently incubated  
1559 in a staining solution of 0.02% Tween 20 in 1X PBS (pH 7.4) with 10 µg/mL wheat germ agglutinin  
1560 conjugated to fluorescein isothiocyanate (WGA-FITC) and 20 µg/mL propidium iodide (PI).  
1561 Samples were protected from light and the staining solution was vacuum-infiltrated for 2 h where  
1562 pressure was continuously reduced to 400 mbar for 5 min followed by ventilation of the  
1563 desiccator and return to standard pressure. The staining solution was replaced by 1X PBS (pH 7.4)  
1564 and the stained leaf samples were directly subjected to confocal microscopy analysis or stored  
1565 lightproof at 4°C for later use. WGA was used to specifically label fungal hyphae [2] but was  
1566 occasionally found to also bind to plant cell walls and bacteria. PI stains DNA and binds to plant  
1567 and fungal cell walls [3]. FITC was excited with an argon laser at 488 nm and fluorescence was  
1568 detected between 500 and 540 nm. A diode-pumped solid-state laser at 561 nm was employed for  
1569 excitation of PI and emission was detected from 600 to 670 nm.

1570

1571 **Generation of DNA plugs and karyotyping by pulsed-field gel electrophoresis**

1572 A non-protoplast protocol was used to produce DNA plugs for separating small chromosomes  
1573 (~0.2 - 1.6 Mb) by pulsed-field gel electrophoresis (PFGE) [4]. Single cells of the three *Z. tritici*



1574 isolates were harvested from liquid YMS cultures. For preparation of plugs,  $5 \times 10^8$  cells were used  
1575 as input and embedded in 1.1% low range agarose (Bio-Rad). Solidified agarose blocks were  
1576 incubated in lysis buffer (1% SDS, 0.45 M EDTA, 1.5 mg/mL Proteinase K (Roth)) at 55°C for 48 h  
1577 and subsequently washed three times in 1X TE buffer for 20 min. Plugs were directly submitted  
1578 to pulsed-field gel electrophoresis or stored in 0.5 M EDTA at 4°C until further use.  
1579 PFGE was conducted using a contour-clamped homogeneous electric field (CHEF)-DR III  
1580 apparatus (Bio-Rad) in 1% agarose in 0.5X TBE buffer applying the following conditions:  
1581 temperature 14°C, 120° angle, 5 V/cm with a ramped 50 - 150 s switching interval for 48 to 68 h.  
1582 Chromosomal DNA of *Saccharomyces cerevisiae* (Bio-Rad) was used as standard size marker. Gels  
1583 were stained for 30 min in 1 µg/mL ethidium bromide solution and chromosome bands were  
1584 detected with the Thyphoon Trio™ (GE).

1585

## 1586 **References**

- 1587 1. Thordal-Christensen H, Zhang Z, Wei Y, Collinge DB (1997) Subcellular localization of H2O2  
1588 in plants. H2O2 accumulation in papillae and hypersensitive response during the barley-  
1589 powdery mildew interaction. *Plant J* 11: 1187–1194. doi:10.1046/j.1365-  
1590 313X.1997.11061187.x.
- 1591 2. Robin JB, Arffa RC, Avni I, Rao NA (1986) Rapid visualization of three common fungi using  
1592 fluorescein-conjugated lectins. *Investig Ophthalmol Vis Sci* 27: 500–506.  
1593 doi:10.1001/archophth.1988.01060140433047.
- 1594 3. Rounds CM, Lubeck E, Hepler PK, Winship LJ (2011) Propidium Iodide Competes with Ca<sup>2+</sup>  
1595 + to Label Pectin in Pollen Tubes and Arabidopsis Root Hairs 1 [ W ][ OA ]. 157: 175–187.  
1596 doi:10.1104/pp.111.182196.
- 1597 4. Stukenbrock EH, Jørgensen FG, Zala M, Hansen TT, McDonald BA, et al. (2010) Whole-  
1598 genome and chromosome evolution associated with host adaptation and speciation of the  
1599 wheat pathogen *Mycosphaerella graminicola*. *PLoS Genet* 6: e1001189.

1600

## 1601 **Supporting information – S3 Text**

1602

## 1603 **Supplementary Information**

1604 **Tools and *commands* used for genome analyses and processing and analyses of *Z. tritici* transcriptome data**

1605

### 1607 **# Quality control of RNA sequencing data**

1608 FastQC ([www.bioinformatics.babraham.ac.uk/projects/fastqc/](http://www.bioinformatics.babraham.ac.uk/projects/fastqc/)) version 0.11.2

1609

### 1610 **# Removal of residual TruSeq adapter sequences**

1611 Trimmomatic [1] version 0.33

```
1612 java -jar /.../trimmomatic-0.33.jar SE -threads 1 -phred33 \
```

```
1613 reads.fastq reads-adap.fastq \
```

```
1614 ILLUMINACLIP:/.../Trimmomatic/adapters/TruSeq3-SE.fa:2:30:15 MINLEN:100
```

1615

### 1616 **# Trimming of 12 nucleotides at 5' end of all reads**

1617 Trimmomatic [1] version 0.33

```
1618 java -jar /.../trimmomatic-0.33.jar SE -threads 1 -phred33 \
```

```
1619 reads-adap.fastq reads-adap-trim.fastq \
```

```
1620 HEADCROP:12
```

1621

### 1622 **# Filtering of reads based on quality scores**

1623 **At least 80 % of bases must have a quality score  $\geq 20$  or read was dropped.**

1624 FASTX-toolkit ([http://hannonlab.cshl.edu/fastx\\_toolkit/](http://hannonlab.cshl.edu/fastx_toolkit/)) version 0.0.14

```
1625 fastq_quality_filter -q 20 -p 80 -v -Q33 \
```

```
1626 -i reads-adap-trim.fastq -o reads-adap-trim-filt.fastq
```

1627

### 1628 **# Masking of low quality bases**

1629 **Nucleotides with quality score  $< 20$  were masked with 'N'.**

1630 FASTX-toolkit ([http://hannonlab.cshl.edu/fastx\\_toolkit/](http://hannonlab.cshl.edu/fastx_toolkit/)) version 0.0.14

```
1631 fastq_masker -q 20 -r N -v -Q33 \
```

```
1632 -i reads-adap-trim-filt.fastq -o reads-adap-trim-fil-maskt.fastq
```

1633

### 1634 **# Mapping of reads to genomes of *Z. tritici* isolates**

1635 TopHat2 [2,3] version 2.0.9

```
1636 tophat --b2-sensitive --read-mismatches=10 --read-gap-length=10 --read-edit-dist=20 \
```

```
1637 --library-type=fr-firststrand \  
1638 -o ../output_directory \  
1639 ../reference_genome_index \  
1640 ../reads-adap-trim-filt-mask.fastq  
1641  
1642 # Manipulation of RNA-seq read alignments  
1643 SAMtools [4] version 0.1.19  
1644 samtools view \  
1645 -o ../read_alignment_accepted_hits.sam \  
1646 ../read_alignment_accepted_hits.bam  
1647 samtools sort \  
1648 ../read_alignment_accepted_hits.bam \  
1649 ../read_alignment_accepted_hits_sort  
1650 samtools index \  
1651 ../read_alignment_accepted_hits_sort.bam  
1652  
1653 # Calculation of relative gene expression levels among the four infection stages within one  
1654 Z. tritici isolate  
1655 Cuffdiff2 in Cufflinks [5] version 2.2.1  
1656 cuffdiff --library-type fr-firststrand --library-norm-method geometric \  
1657 --dispersion-method per-condition --FDR 0.001 \  
1658 -L Ztxx_stage_A,Ztxx_stage_B,Ztxx_stage_C,Ztxx_stage_D \  
1659 ../Ztxx_genes.gff \  
1660 ../Ztxx_stage_A_rep1_read_alignment_accepted_hits_sort.bam \  
1661 ../Ztxx_stage_A_rep2_read_alignment_accepted_hits_sort.bam \  
1662 ../Ztxx_stage_B_rep1_read_alignment_accepted_hits_sort.bam \  
1663 ../Ztxx_stage_B_rep2_read_alignment_accepted_hits_sort.bam \  
1664 ../Ztxx_stage_C_rep1_read_alignment_accepted_hits_sort.bam \  
1665 ../Ztxx_stage_C_rep2_read_alignment_accepted_hits_sort.bam \  
1666 ../Ztxx_stage_D_rep1_read_alignment_accepted_hits_sort.bam \  
1667 ../Ztxx_stage_D_rep2_read_alignment_accepted_hits_sort.bam \  
1668 -o ../output_directory \  
1669  
1670 # Counting of mapped sequencing reads per gene  
1671 HTSeq [6] version 0.6.1p1  
1672 htseq-count -m union --type=gene --idattr=Name --stranded=reverse \  

```

```
1673 /.../read_alignment_accepted_hits.sam \  
1674 /.../Ztxx_genes.gff \  
1675 > /.../Ztxx_genes_counts.txt  
1676  
1677 # Differential gene expression analyses  
1678 R package DESeq2 [7] version 1.10.1  
1679 # Comparison between infection stages across all isolates  
1680 ddsMatrix <- DESeqDataSetFromMatrix(countData = countdata, colData = condition.table,  
1681                                     design = ~ strain+stage)  
1682 dds <- DESeq(ddsMatrix, betaPrior = T, modelMatrixType = "expanded")  
1683 DE_genes_AB <- results(dds, contrast=c("stage", "B", "A"))  
1684 DE_genes_BC <- results(dds, contrast=c("stage", "C", "B"))  
1685 DE_genes_CD <- results(dds, contrast=c("stage", "D", "C"))  
1686  
1687 # Comparison within infection stages between two isolates  
1688 dds$group <- factor(paste0(dds$strain, dds$stage))  
1689 design(dds) <- ~ group  
1690 dds <- DESeq(dds)  
1691 DE_genes_Ztxx_Ztyy_stageA <- results(dds, contrast=c("group", "ZtxxA", "ZtyyA"))  
1692  
1693 # Gene ontology (GO) term enrichment analyses  
1694 R package topGO [8] version 2.28.0  
1695  
1696 # Protein families (PFAM) enrichment analyses  
1697 Custom python script  
1698 #!/usr/bin/python  
1699  
1700 import os,sys,re,scipy.stats  
1701 import numpy as np  
1702  
1703 bck=open(os.path.abspath(sys.argv[2])).readlines()  
1704 subset=[i.rstrip() for i in open(os.path.abspath(sys.argv[1])).readlines()]  
1705  
1706 des=open("./pfam_desc.txt").readlines()  
1707  
1708 pfam_desc={}  
1709 for i in des:  
1710     i=i.rstrip()  
1711     s=i.split("\t")  
1712     if not pfam_desc.has_key(s[0]):  
1713         pfam_desc[s[0]]=s[2]  
1714  
1715 pfam_bck={}  
1716 pfam_subset={}  
1717 nb_gene_pfam_bck=0  
1718 nb_gene_pfam_subset=0  
1719
```

```
1720 for line in bck:
1721     s=line.rstrip().split()
1722     gene=s[0]
1723     if len(s)>1:
1724         t=s[-1].split(";")
1725         nb_gene_pfam_bck+=1
1726         if gene in subset:
1727             nb_gene_pfam_subset+=1
1728         for i in t:
1729             if not pfam_bck.has_key(i):
1730                 pfam_bck[i]=1
1731             else:
1732                 pfam_bck[i]+=1
1733
1734         if gene in subset:
1735             if not pfam_subset.has_key(i):
1736                 pfam_subset[i]=1
1737             else:
1738                 pfam_subset[i]+=1
1739
1740 pfam_domains=pfam_bck.keys()
1741
1742 M=nb_gene_pfam_bck
1743 N=nb_gene_pfam_subset
1744
1745
1746 print "ACC\tDESC\tNB_PROT_DOMAIN_SET\tNB_PROT_DOMAIN_OTHER\tENRICHMENT\tPVALUE"
1747 for domain in pfam_domains:
1748     x=0
1749     n=pfam_bck[domain]
1750     if pfam_subset.has_key(domain):
1751         x=pfam_subset[domain]
1752
1753     obs = np.array([[x, N-x],[n-x, M-N-(n-x)])]
1754     fo=x/float(N)
1755     fe2=(n-x)/float(M-N)
1756     enrich=0.0
1757     if fe2>0 and fo>0:
1758         enrich=fo/fe2
1759     pvalue_hypergeo=scipy.stats.hypergeom.sf(x,M,n,N)
1760     chi2, pvalue_chi2, dof, ex = scipy.stats.chi2_contingency(obs)
1761     if x>0 and enrich>1:
1762         print "%s\t%s\t%s\t%s\t%.1f\t%.6f"
1763     %(domain,re.sub("\s","_",pfam_desc[domain]),x,n-x,enrich,pvalue_chi2)
1764
```

## 1765 # Calculation of genomic distances between genes and TEs / H3K9me3 and H3K27me3

1766 BEDtools [9] version 2.26.0

```
1767 bedtools closest -d -t first \
```

```
1768 -a ../Ztxx_genes.bed \
```

```
1769 -b ../Ztxx_features.bed \
```

```
1770 > ../Ztxx_genes_feature_distances.txt
```

1771

## 1772 # De novo genome assemblies of Zt05 and Zt10 based on PacBio long reads

1773 SMARTanalysis suite [10] version 2.3.0

1774 HGAP version 3.0

1775 Quiver

```
1776 source Local_SMRTanalysis/current/etc/setup.sh
```

1777

1778 *fofnToSmrtpipeInput.py HGAP.input.fofn > HGAP.input.xml*

1779

1780 *smrtpipe.py -D NPROC=2 -D MAX\_THREADS=2 \*

1781 *--output=Results\_SMRT -params=HGAP.input.xml xml:HGAP.input.xml*

1782

1783 **# Synteny mapping and analyses of IPO323/Zt09 chromosomes and Zt05 and Zt10 unitigs**

1784 SyMAP [11] version 4.2

1785 Applying default settings and running NUCmer and PROmer to compute raw hits for anchor  
1786 clustering.

1787 Minimal contig size: Zt05: 1,000 kb

1788 Zt09: 100,000 kb

1789 Zt10: 10,000 kb

1790

1791 Mugsy [12] version 1.r2.2

1792 Generation of pairwise genome alignments of IPO323 – Zt05 and IPO323 – Zt10 applying default  
1793 settings of Mugsy.

1794 Custom python script to extract unique DNA blocks with a minimum length of 1 bp and calculate  
1795 the total amount of unique DNA.

```
1796 alignment = maf_parse(args.maf)
1797 min_len = int(args.min_len)
1798
1799 count = 0
1800 if args.mode == "normal":
1801     for mga in alignment:
1802         strains_i = args.include.split(",")
1803         for position in xrange(0, len(mga[0]["seq"]), 1):
1804             temp_bin = []
1805             all_there = 0
1806             for record in mga:
1807                 if any(strain in record["id"] for strain in strains_i):
1808                     all_there += 1
1809                     temp_bin.append(record["seq"][position])
1810             if all_there == len(strains_i) and len(temp_bin) ==
1811 len(strains_i):
1812                 if int(mga[0]["len"]) >= min_len:
1813                     if "-" in temp_bin:
1814                         pass
1815                     else:
1816                         count += 1
1817             print "%sbp conserved" % count
1818
1819 elif args.mode == "reverse":
1820     for mga in alignment:
1821         strains_i = args.include.split(",")
1822         strains_e = args.exclude.split(",")
1823         exclude_there = 0
1824         all_there_except = 0
1825         for record in mga:
1826             if any(strain in record["id"] for strain in strains_i):
1827                 all_there_except += 1
1828             elif any(strain in record["id"] for strain in strains_e):
```

```
1829         exclude_there += 1
1830     else:
1831         pass
1832     if all_there_except == len(strains_i) and exclude_there == 0:
1833         if int(mga[0]["len"]) >= min_len:
1834             count += int(mga[0]["len"])
1835     print "%sbp unique" % count
1836
```

## 1837 References

- 1838 1. Bolger AM, Lohse M, Usadel B (2014) Trimmomatic: A flexible trimmer for Illumina  
1839 sequence data. *Bioinformatics* 30: 2114–2120. doi:10.1093/bioinformatics/btu170.
- 1840 2. Kim D, Pertea G, Trapnell C, Pimentel H, Kelley R, et al. (2013) TopHat2: accurate alignment  
1841 of transcriptomes in the presence of insertions, deletions and gene fusions. *Genome Biol*  
1842 14: R36. Available: <http://genomebiology.com/2013/14/4/R36>.
- 1843 3. Trapnell C, Roberts A, Goff L, Pertea G, Kim D, et al. (2012) Differential gene and transcript  
1844 expression analysis of RNA-seq experiments with TopHat and Cufflinks. *Nat Protoc* 7: 562–  
1845 578.
- 1846 4. Li H, Handsaker B, Wysoker A, Fennell T, Ruan J, et al. (2009) The Sequence Alignment/Map  
1847 format and SAMtools. *Bioinformatics* 25: 2078–2079. doi:10.1093/bioinformatics/btp352.
- 1848 5. Trapnell C, Hendrickson DG, Sauvageau M, Goff L, Rinn JL, et al. (2013) Differential analysis  
1849 of gene regulation at transcript resolution with RNA-seq. *Nat Biotechnol* 31: 46–53.
- 1850 6. Anders S, Pyl PT, Huber W (2015) HTSeq—a Python framework to work with high-  
1851 throughput sequencing data. *Bioinformatics* 31: 166–169.
- 1852 7. Love MI, Huber W, Anders S (2014) Moderated estimation of fold change and dispersion  
1853 for RNA-seq data with DESeq2. *Genome Biol* 15: 550.
- 1854 8. Alexa A, Rahnenführer J, Lengauer T (2006) Improved scoring of functional groups from  
1855 gene expression data by decorrelating GO graph structure. *Bioinformatics* 22: 1600–1607.  
1856 doi:10.1093/bioinformatics/btl140.
- 1857 9. Quinlan AR, Hall IM (2010) BEDTools: A flexible suite of utilities for comparing genomic  
1858 features. *Bioinformatics* 26: 841–842. doi:10.1093/bioinformatics/btq033.
- 1859 10. Chin C-S, Alexander DH, Marks P, Klammer AA, Drake J, et al. (2013) Nonhybrid, finished  
1860 microbial genome assemblies from long-read SMRT sequencing data. *Nat Methods* 10:  
1861 563–569.
- 1862 11. Soderlund C, Bomhoff M, Nelson WM (2011) SyMAP v3.4: A turnkey synteny system with  
1863 application to plant genomes. *Nucleic Acids Res* 39. doi:10.1093/nar/gkr123.
- 1864 12. Angiuoli S V., Salzberg SL (2011) Mugsy: Fast multiple alignment of closely related whole  
1865 genomes. *Bioinformatics* 27: 334–342. doi:10.1093/bioinformatics/btq665.
- 1866
